# Supplementary material for: The facile synthesis of 2-bromoindoles via Cs2CO3-promoted intramolecular cyclization of 2-(gem-dibromovinyl)anilines under transition-metal-free conditions
Source: Royal Society of Chemistry journal article supplement (doi:10.1039/c2ra22172a), 2012-10-30
Supplement: c2ra22172a.pdf [file c2ra22172a.pdf]

## *Supporting information :*

# **The facile synthesis of 2-bromoindoles via Cs<sub>2</sub>CO<sub>3</sub>-promoted intramolecular cyclization of 2-(*gem*-dibromovinyl)anilines under transition-metal-free conditions**

Pinhua Li,<sup>[a]</sup> Yong Ji,<sup>[b]</sup> Wei Chen,<sup>[a]</sup> Xiuli Zhang,<sup>[b]</sup> and Lei Wang\*<sup>[a] [c]</sup>

[a] Department of Chemistry, Huaibei Normal University, Huaibei, Anhui 235000, P R China

Tel: + 86-561-3802-069 Fax: + 86-561-3090-518 E-mail: leiwang@chnu.edu.cn

[b] Department of Chemistry, Anhui Agricultural University, Hefei, Anhui 230062, P R China

[c] State Key Laboratory of Organometallic Chemistry, Shanghai Institute of Organic Chemistry, Chinese Academy of Sciences, Shanghai 200032, P R China

### *Table of Contents for Supporting Information*

---

|                                                                            |    |
|----------------------------------------------------------------------------|----|
| 1. General considerations.....                                             | 2  |
| 2. General procedures .....                                                | 2  |
| 3. The <sup>1</sup> H NMR spectra of isotope experiments.....              | 7  |
| 4. ICP-AES analysis of Cs <sub>2</sub> CO <sub>3</sub> sample.....         | 8  |
| 5. Characterization data for starting materials and all the products ..... | 9  |
| 6. <sup>1</sup> H and <sup>13</sup> C NMR spectra of compounds.....        | 21 |
| 7. References .....                                                        | 68 |

---

## 1. General considerations

All reagents were purchased from commercial suppliers and used without further purification. 2-(*gem*-Dibromovinyl)-*N*-methylsulfonylanilines were prepared according to the literature.<sup>[1]</sup> All Cs<sub>2</sub>CO<sub>3</sub>-promoted intramolecular cyclization reactions of *gem*-dibromoolefins were carried out under an air atmosphere. <sup>1</sup>H NMR and <sup>13</sup>C NMR spectra were measured on a Bruker Avance NMR spectrometer (400 MHz or 100MHz, respectively) with CDCl<sub>3</sub> as solvent and recorded in ppm relative to internal tetramethylsilane standard. The peak patterns are indicated as follows: s, singlet; d, doublet; t, triplet; m, multiplet; q, quartet. The coupling constants, *J*, are reported in Hertz (Hz). High resolution mass spectroscopy data of the product were collected on a Waters Micromass GCT instrument.

## 2. General procedures

### (1) Typical synthetic procedure of 6a-D

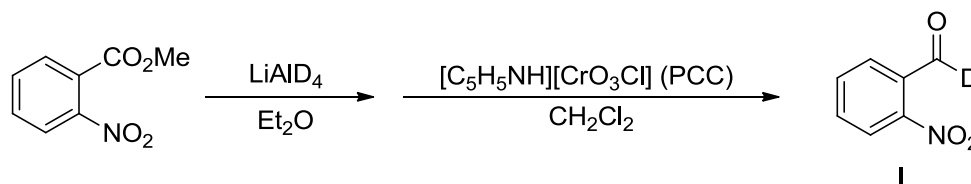

To a suspension of methyl 2-nitrobenzoate (5.44 g, 30 mmol) in Et<sub>2</sub>O (90 mL) was added LiAlD<sub>4</sub> (0.672 g, 16 mmol) in several portions at 0 °C. After addition, the mixture was stirred at 0 °C for another 2 h before quenched by pouring into HCl (1.0 mol/L, 100 mL). The resulting mixture was extracted with Et<sub>2</sub>O (2×60 mL), washed with NaHCO<sub>3</sub> (aq. 20 mL), brine (20 mL), and dried over MgSO<sub>4</sub>. The crude material was chromatographed with 25% EtOAc in hexanes to afford the benzyl alcohol as a yellow solid (1.52 g, 33%), which was directly used in next step.

The benzyl alcohol (1.50 g) solution in DCM (30 mL) was added PCC (pyridinium chlorochromate, 3.2 g), and the mixture was stirred at room temperature overnight. The resulting mixture was filtered through a celite pad. After the celite was washed with DCM (40 mL), the

combined organic solvent was evaporated and chromatographed with 20% EtOAc in hexanes to give the deuterated 2-nitrobenzaldehyde-D (**I**) as a slightly yellow solid (1.19 g, 80%).

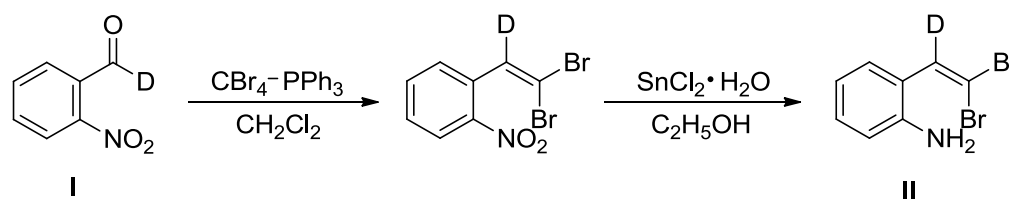

To a solution of 2-nitrobenzaldehyde-D (**I**, 1.19 g, 7.76 mmol) and  $\text{CBr}_4$  (3.86 g, 11.64 mmol) in DCM (40 mL) at 0 °C was added dropwise a solution of  $\text{PPh}_3$  (6.10 g, 23.28 mmol) in DCM (20 mL) by an addition funnel. The addition rate was controlled so that the internal temperature was at 1–5 °C. After addition (about 1 h), the mixture was stirred for another 0.5 h before it was warmed to room temperature, and stirred for an additional 1 h. The reaction mixture was filtered through a short plug of silica gel (12 g) and was washed with a copious amount of DCM until no product was found. Solvent was removed under reduced pressure to give a mixture of the desired intermediate and triphenylphosphine oxide. To the mixture was added EtOH (95%, 20 mL) and  $\text{SnCl}_2\cdot\text{H}_2\text{O}$  (8.76 g, 38.8 mmol). The suspension was heated at 100 °C (reflux) for 45 min, and then cooled to room temperature. After most of the ethanol was removed under reduced pressure,  $\text{H}_2\text{O}$  (20 mL) and EtOAc (20 mL) were added. To the resulting mixture, solid  $\text{K}_2\text{CO}_3$  was added carefully until pH > 10. The EtOAc layer was separated from the heterogeneous mixture, and the aqueous phase was extracted with EtOAc until it was free of the product (4×20 mL). The combined organic solution was washed with brine and dried over  $\text{Na}_2\text{SO}_4/\text{K}_2\text{CO}_3$ . Solvent was removed under reduced pressure and the residue was redissolved in  $\text{Et}_2\text{O}$ . The resulting precipitated  $\text{Ph}_3\text{P}(\text{O})$  was removed by filtration. The product was further purified by flash chromatography using 10% EtOAc in hexanes. The product (**II**) was obtained as a white solid (1.60 g, 74% yield over 2 steps).

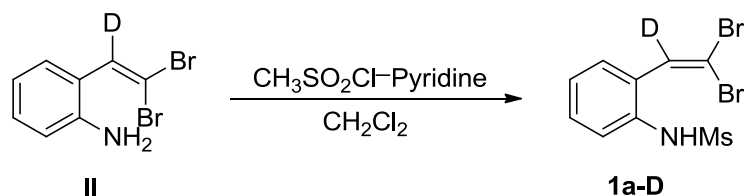

To a solution of **II** (1.38g, 5.0 mmol) and pyridine (0.8 mL, 10 mmol) in DCM (10 mL) was added dropwise MsCl (0.58 mL, 7.5 mmol) at 0 °C. The mixture was warmed slowly to room temperature, stirred for an additional 12 h, and diluted with EtOAc (10 mL). The mixture was washed with NaHSO<sub>4</sub> (20%, 2×10 mL), NaHCO<sub>3</sub> (aq. 10 mL), brine (10 mL), and dried over anhydrous Na<sub>2</sub>SO<sub>4</sub>. The crude mixture was purified by column chromatography on silica gel to afford the product **1a-D** as a white solid (1.71 g, 96% yield). <sup>1</sup>H NMR (CDCl<sub>3</sub>, 400 MHz) δ: 7.56–7.54 (m, 1H), 7.46–7.38 (m, 2H), 7.27–7.24 (m, 1H), 6.64 (s, 1H), 3.07 (s, 3H); <sup>13</sup>C NMR (CDCl<sub>3</sub>, 100 MHz) δ: 133.76, 130.00, 129.11, 125.79, 122.39, 95.60, 40.15. HRMS (EI) ([M]<sup>+</sup>) Calcd. for C<sub>9</sub>H<sub>8</sub>DBr<sub>2</sub>NO<sub>2</sub>S: 353.8784, Found: 353.8788.

## (2) Typical procedure for the preparation of 2-(*gem*-dibromovinyl)-*N*-methylsulfonylaniline

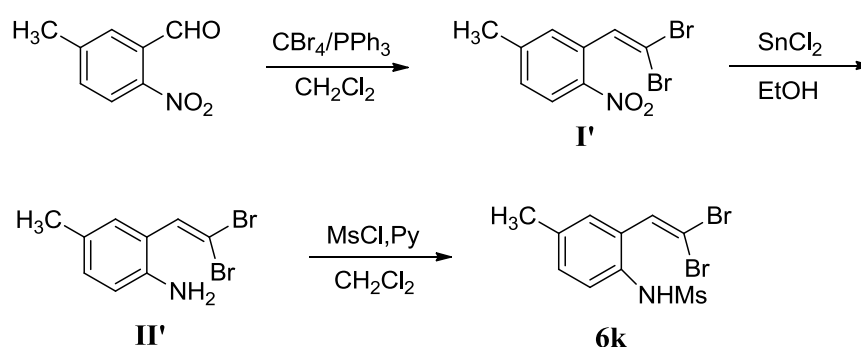

At 0 °C, to a solution of 4-methyl-2-nitrobenzaldehyde (1.65 g, 10 mmol) and CBr<sub>4</sub> (6.65 g, 20 mmol) in DCM (50 mL) was added dropwise a solution of PPh<sub>3</sub> (10.5 g, 40 mmol) in DCM (50 mL) by an addition funnel. The addition rate was controlled so that the internal temperature was below 5 °C. After addition (about 1 h), the mixture was stirred for another 2 hrs before

warmed to r. t., and stirred for an additional 3 h. The DCM was removed under vacuum, then EtOAc (200 mL) was added and stirred for 0.5 h, the mixture was filtered and washed with EtOAc until no product was found. Solvent was removed under reduced pressure, the residue was purified by flash chromatography using 10% EtOAc in hexanes. The product (**I'**) was obtained as a light yellow solid (2.60 g, 81%).

**I'** (1.61 g, 5.0 mmol) and  $\text{SnCl}_2 \cdot \text{H}_2\text{O}$  (67.7 g, 25 mmol) were mixed in EtOH (95%, 50 mL). The mixture was refluxed at 100 °C for 2 h, and then cooled to r. t. After most of the ethanol was removed under vacuum,  $\text{H}_2\text{O}$  (50 mL) and EtOAc (100 mL) were added. To the resulting mixture, solid  $\text{NaHCO}_3$  was added carefully until pH >10. The EtOAc layer was separated and the aqueous phase was extracted with EtOAc until it was free of the product. The combined organic solution was washed with brine and dried over  $\text{Na}_2\text{SO}_4$ . Solvent was removed under vacuum. The crude product (**II'**) was resolved in DCM (20 mL), and pyridine (1.0 g, 12.5 mmol) was added. After the mixture was cooled to 0 °C, methanesulfonyl chloride (0.69 g, 6.0 mmol) was added, the mixture was stirred for 4 h before warmed to r. t., and stirred for an additional 5 h. After the reaction was completed, the mixture was washed with HCl (1.0 mol/L, 15 mL), The DCM layer was separated and the aqueous phase was extracted with DCM until it was free of the product. Solvent was removed and the product was further purified by flash chromatography using 25% EtOAc in hexanes. The product **6k** was obtained as a white solid (1.06 g, 58% yield over 2 steps).  $^1\text{H}$  NMR ( $\text{CDCl}_3$ , 400 MHz):  $\delta$  7.50 (s, 1H), 7.40 (d,  $J$  = 8.0 Hz, 1H), 7.25 (s, 1H), 7.19 (d,  $J$  = 8.4 Hz, 1H), 6.53 (s, 1H), 3.02 (s, 3H), 2.36 (s, 3H);  $^{13}\text{C}$  NMR ( $\text{CDCl}_3$ , 100 MHz):  $\delta$  136.22, 133.62, 130.97, 130.58, 130.01, 123.66, 94.95, 39.98, 20.89. HRMS (EI) ( $[\text{M}]^+$ ) Calcd. for  $\text{C}_{10}\text{H}_{11}\text{NO}_2\text{SBr}_2$ : 366.8877, Found: 366.8875.

### **(3) Typical procedure for the synthesis of 2-bromoindole (8a) via $\text{Cs}_2\text{CO}_3$ -promoted intramolecular cyclization of 2-(*gem*-dibromovinyl)-*N*-methanesulfonylaniline (6a)**

In air atmosphere, a 10 mL of sealable reaction tube with a Teflon-coated screw cap

equipped with a magnetic stir bar was charged with 2-(*gem*-dibromovinyl)-*N*-methylsulfonylaniline (**6a**, 0.50 mmol), Cs<sub>2</sub>CO<sub>3</sub> (0.50 mmol) and EtOH (2.0 mL). The reaction vessel was placed in an oil bath. After the reaction was carried out at 80 °C for 8 h, it was cooled to room temperature, extracted twice with Et<sub>2</sub>O. The organic layers were combined, dried over Na<sub>2</sub>SO<sub>4</sub>, and concentrated under reduced pressure to yield the crude product, which was further purified by flash chromatography on silica gel (eluant: hexane/ethyl acetate) to give the desired product 2-bromoindole (**8a**).

**(4) Typical procedure for the synthesis of 2-bromo-*N*-methylsulfonylindole (9a) via Cs<sub>2</sub>CO<sub>3</sub>-promoted intramolecular cyclization of 2-(*gem*-dibromovinyl)-*N*-methylsulfonylaniline (6a)**

In air atmosphere, a 10 mL of sealable reaction tube with a Teflon-coated screw cap equipped with a magnetic stir bar was charged with 2-(*gem*-dibromovinyl)-*N*-methylsulfonylaniline (**6a**, 0.50 mmol), Cs<sub>2</sub>CO<sub>3</sub> (0.25 mmol) and EtOH (2.0 mL). The reaction vessel was placed in an oil bath. After the reaction was carried out at 80 °C for 8 h, it was cooled to room temperature, extracted twice with Et<sub>2</sub>O. The organic layers were combined, dried over Na<sub>2</sub>SO<sub>4</sub>, and concentrated under reduced pressure to yield the crude product, which was further purified by flash chromatography on silica gel (eluant: hexane/ethyl acetate) to give the desired product 2-bromo-*N*-methylsulfonylindole (**9a**).

### 3. The $^1\text{H}$ NMR spectra of isotope experiment

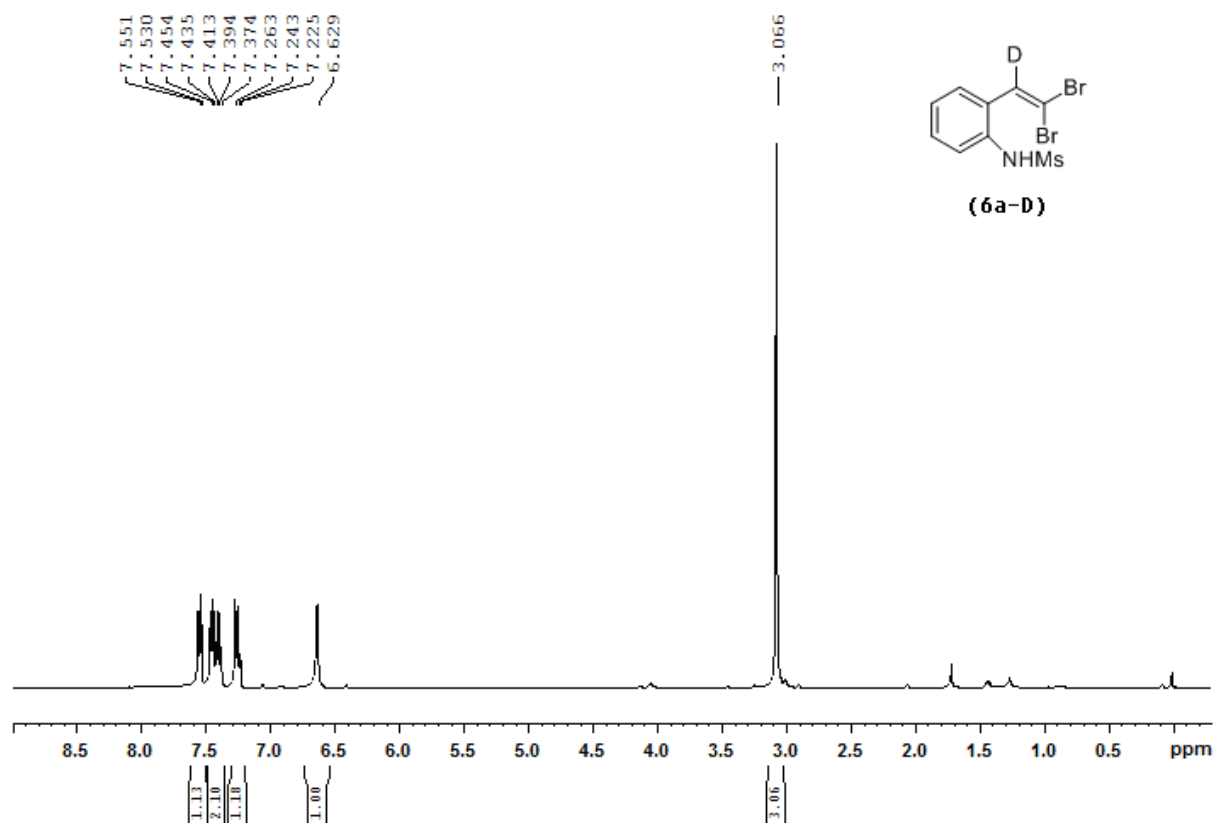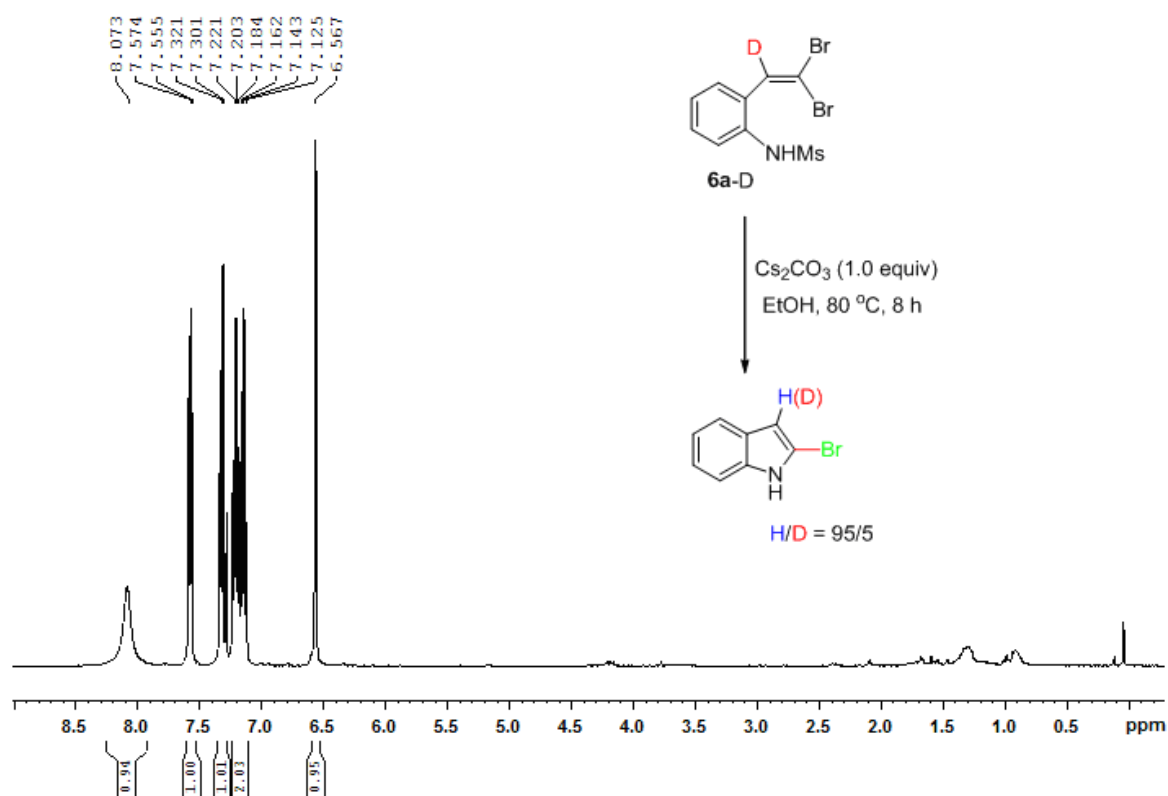

#### 4. ICP-AES analysis of Cs<sub>2</sub>CO<sub>3</sub> sample

**Table S1.** ICP-MS (Inductively Coupled Plasma Mass Spectroscopy) analysis of metal elements in Cs<sub>2</sub>CO<sub>3</sub> sample

| Sample                                                           | Element (µg/g, ppm) |    |    |      |      |    |    |
|------------------------------------------------------------------|---------------------|----|----|------|------|----|----|
|                                                                  | Ni                  | Co | Fe | Cu   | Pd   | Ru | Rh |
| Cs <sub>2</sub> CO <sub>3</sub> (99.995%)<br>sample from Aldrich | ND                  | ND | ND | 0.30 | 0.01 | ND | ND |

ND: Not detected.

### 中国科学技术大学理化科学实验中心 检 测 报 告

报告编号：ICP-2012-100

报告日期：2012.07.20

样品名称：粉末

委托单位：淮北师范大学

送检方式：委托测试

送检日期：2012.07.16

| 样品编号                                                                   | 测定元素含量(µg/g) |      |
|------------------------------------------------------------------------|--------------|------|
|                                                                        | Cu           | Pd   |
| Wang01                                                                 | 0.30         | 0.01 |
| 说明：1. 本报告涂改增删无效；<br>2. 本报告只对来样负责；<br>3. 如果客户对本报告有异议，请于报告发出之日起15日内提出异议。 |              |      |

注：采用等离子体质谱仪测定  
 仪器型号：Xseries 2  
 生产商：Thermo Sciendtific(USA).



## 5. Characterization data for starting materials and all the products

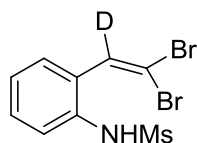

**6a-D:**  $^1\text{H}$  NMR ( $\text{CDCl}_3$ , 400 MHz)  $\delta$ : 7.55–7.53 (m, 1H), 7.45–7.37 (m, 2H), 7.26–7.23 (m, 1H), 6.63 (s, 1H), 3.07 (s, 3H);  $^{13}\text{C}$  NMR ( $\text{CDCl}_3$ , 100 MHz)  $\delta$ : 133.76, 130.00, 129.11, 125.79, 122.39, 95.60, 40.15. HRMS (EI) ( $[\text{M}]^+$ ) Calcd. for  $\text{C}_9\text{H}_8\text{DBr}_2\text{NO}_2\text{S}$ : 353.8784, Found: 353.8788.

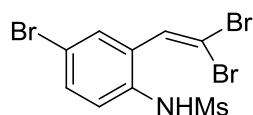

**6d:**  $^1\text{H}$  NMR ( $\text{CDCl}_3$ , 400 MHz)  $\delta$ : 7.57 (d,  $J = 2.0$  Hz, 1H), 7.52 (d,  $J = 2.0$  Hz, 1H), 7.37–7.31 (m, 2H), 6.66 (s, 1H), 3.07 (s, 3H);  $^{13}\text{C}$  NMR ( $\text{CDCl}_3$ , 100 MHz)  $\delta$ : 132.89, 132.88, 132.61, 131.80, 130.68, 123.71, 118.78, 97.16, 40.27. HRMS (EI) ( $[\text{M}]^+$ ) Calcd. for  $\text{C}_9\text{H}_8\text{NO}_2\text{SBr}_3$ : 430.7826, Found: 430.7829.

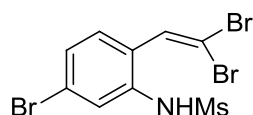

**6h:**  $^1\text{H}$  NMR ( $\text{CDCl}_3$ , 400 MHz)  $\delta$ : 7.74 (s, 1H), 7.36 (d,  $J = 5.2$  Hz, 2H), 7.29 (d,  $J = 8.8$  Hz, 1H), 6.59 (s, 1H), 3.12 (s, 3H);  $^{13}\text{C}$  NMR ( $\text{CDCl}_3$ , 100 MHz)  $\delta$ : 135.01, 132.02, 131.16, 128.58, 127.14, 124.18, 123.64, 96.84, 40.45. HRMS (EI) ( $[\text{M}]^+$ ) Calcd. for  $\text{C}_9\text{H}_8\text{NO}_2\text{SBr}_3$ : 430.7826, Found: 430.7830.

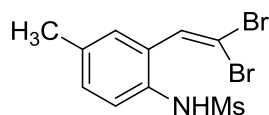

**6k:**  $^1\text{H}$  NMR ( $\text{CDCl}_3$ , 400 MHz)  $\delta$ : 7.50 (s, 1H), 7.40 (d,  $J = 8.0$  Hz, 1H), 7.25 (s, 1H), 7.19 (d,  $J = 8.4$  Hz, 1H), 6.53 (s, 1H), 3.02 (s, 3H), 2.36 (s, 3H);  $^{13}\text{C}$  NMR ( $\text{CDCl}_3$ , 100 MHz)  $\delta$ : 136.22, 133.62, 130.97, 130.58, 130.01, 123.66, 94.95, 39.98, 20.89. HRMS (EI) ( $[\text{M}]^+$ ) Calcd. for  $\text{C}_{10}\text{H}_{11}\text{NO}_2\text{SBr}_2$ : 366.8877, Found: 366.8875.

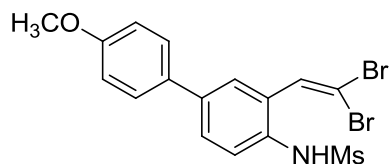

**6l:**  $^1\text{H}$  NMR ( $\text{CDCl}_3$ , 400 MHz)  $\delta$ : 7.62–7.58 (m, 3H), 7.53–7.50 (m, 3H), 7.00 (d,  $J$  = 8.4 Hz, 2H), 6.42 (s, 1H), 3.87 (s, 3H), 3.10 (s, 3H);  $^{13}\text{C}$  NMR ( $\text{CDCl}_3$ , 100 MHz)  $\delta$ : 159.51, 138.62, 133.19, 132.09, 131.93, 129.57, 128.04, 128.02, 122.97, 114.39, 95.96, 55.39, 40.21. HRMS (EI) ( $[\text{M}]^+$ ) Calcd. for  $\text{C}_{16}\text{H}_{15}\text{NO}_3\text{SBr}_2$ : 458.9139, Found: 458.9136.

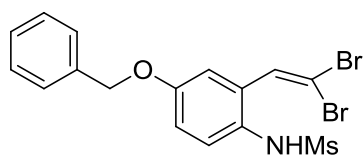

**6m:**  $^1\text{H}$  NMR ( $\text{CDCl}_3$ , 400 MHz)  $\delta$ : 7.53 (s, 1H), 7.44–7.38 (m, 5H), 7.36 (d,  $J$  = 6.8 Hz, 1H), 7.11 (s, 1H), 7.01 (d,  $J$  = 8.8 Hz, 1H), 6.19 (s, 1H), 5.09 (s, 2H), 3.00 (s, 3H);  $^{13}\text{C}$  NMR ( $\text{CDCl}_3$ , 100 MHz)  $\delta$ : 157.32, 136.31, 133.44, 132.88, 128.71, 128.20, 127.44, 127.35, 126.13, 116.49, 115.71, 94.81, 70.41, 39.98. HRMS (EI) ( $[\text{M}]^+$ ) Calcd. for  $\text{C}_{16}\text{H}_{15}\text{NO}_3\text{SBr}_2$ : 458.9139, Found: 458.9142.

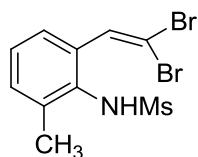

**6o:**  $^1\text{H}$  NMR ( $\text{CDCl}_3$ , 400 MHz)  $\delta$ : 7.58 (s, 1H), 7.33–7.31 (m, 1H), 7.16–7.14 (m, 2H), 6.61 (s, 1H), 2.98 (s, 3H), 2.33 (s, 3H);  $^{13}\text{C}$  NMR ( $\text{CDCl}_3$ , 100 MHz)  $\delta$ : 138.10, 135.52, 135.23, 131.65, 131.45, 127.87, 127.39, 92.55, 41.64, 18.88. HRMS (EI) ( $[\text{M}]^+$ ) Calcd. for  $\text{C}_{10}\text{H}_{11}\text{NO}_2\text{SBr}_2$ : 366.8877, Found: 366.8879.

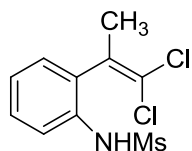

**6t:**  $^1\text{H}$  NMR ( $\text{CDCl}_3$ , 400 MHz)  $\delta$ : 7.63 (d,  $J$  = 8.4 Hz, 1H), 7.38–7.34 (m, 1H), 7.21–7.18 (m, 1H), 7.12 (d,  $J$  = 7.2 Hz, 1H), 6.51 (s, 1H), 3.09 (s, 3H), 2.18 (s, 3H);  $^{13}\text{C}$  NMR ( $\text{CDCl}_3$ , 100 MHz)  $\delta$ : 133.32, 132.25, 131.22, 129.50, 128.74, 125.13, 120.25, 119.85, 40.15, 22.51. HRMS (EI) ( $[\text{M}]^+$ ) Calcd. for  $\text{C}_{10}\text{H}_{11}\text{Cl}_2\text{NO}_2\text{S}$ : 278.9888, Found: 278.9885.

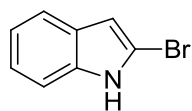

**8a**<sup>[2]</sup>: <sup>1</sup>H NMR (CDCl<sub>3</sub>, 400 MHz)  $\delta$ : 8.10 (s, 1H), 7.56 (d,  $J$  = 8.0 Hz, 1H), 7.31 (d,  $J$  = 8.0 Hz, 1H), 7.21–7.18 (m, 1H), 7.15–7.12 (m, 1H), 6.56 (s, 1H); <sup>13</sup>C NMR (CDCl<sub>3</sub>, 100 MHz)  $\delta$ : 136.36, 128.68, 122.22, 120.47, 119.61, 110.30, 108.65, 104.80.

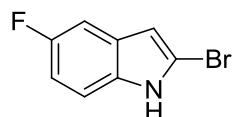

**8b**: <sup>1</sup>H NMR (CDCl<sub>3</sub>, 400 MHz)  $\delta$ : 8.11 (s, 1H), 7.18 (m, 2H), 6.94–6.89 (m, 1H), 6.49 (s, 1H); <sup>13</sup>C NMR (CDCl<sub>3</sub>, 100 MHz)  $\delta$ : 158.16 ( $J$  = 234.2 Hz), 132.96, 129.04 ( $J$  = 10.4 Hz), 111.02 ( $J$  = 9.4 Hz), 110.60 ( $J$  = 26.2 Hz), 110.25, 105.01 ( $J$  = 4.5 Hz), 104.72 ( $J$  = 23.8 Hz). HRMS (EI) ( $[M]^+$ ) Calcd. for C<sub>8</sub>H<sub>5</sub>NFBr: 212.9589, Found: 212.9593.

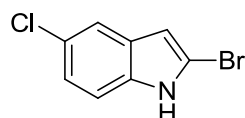

**8c**: <sup>1</sup>H NMR (CDCl<sub>3</sub>, 400 MHz)  $\delta$ : 8.18 (s, 1H), 7.51 (d,  $J$  = 1.6 Hz, 1H), 7.23–7.21 (m, 1H), 7.15–7.13 (m, 1H), 6.49 (br, 1H); <sup>13</sup>C NMR (CDCl<sub>3</sub>, 100 MHz)  $\delta$ : 134.71, 129.65, 126.24, 122.56, 119.05, 111.27, 110.09, 104.56. HRMS (EI) ( $[M]^+$ ) Calcd. for C<sub>8</sub>H<sub>5</sub>NCIBr: 228.9294, Found: 228.9297.

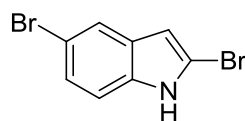

**8d**<sup>[2]</sup>: <sup>1</sup>H NMR (CDCl<sub>3</sub>, 400 MHz)  $\delta$ : 8.24 (s, 1H), 7.67 (d,  $J$  = 1.6 Hz, 1H), 7.28–7.26 (m, 1H), 7.17 (d,  $J$  = 8.4 Hz, 1H), 6.49 (d,  $J$  = 2.0 Hz, 1H); <sup>13</sup>C NMR (CDCl<sub>3</sub>, 100 MHz)  $\delta$ : 135.01, 130.30, 125.12, 122.12, 113.77, 111.75, 110.06, 104.43.

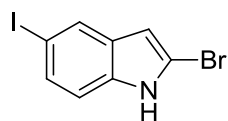

**8e**<sup>[2]</sup>: <sup>1</sup>H NMR (CDCl<sub>3</sub>, 400 MHz)  $\delta$ : 8.36 (s, 1H), 7.87 (s, 1H), 7.42 (d,  $J$  = 8.4 Hz, 1H), 7.07 (d,  $J$  = 8.4 Hz, 1H), 6.47 (s, 1H); <sup>13</sup>C NMR (CDCl<sub>3</sub>, 100 MHz)  $\delta$ : 135.46, 131.09, 130.57, 128.33,

112.20, 109.71, 104.07, 84.01.

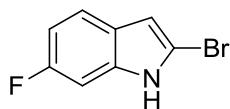

**8f**<sup>[2]</sup>: <sup>1</sup>H NMR (CDCl<sub>3</sub>, 400 MHz) δ: 8.14 (s, 1H), 7.43 (dd, *J* = 2.4, 8.4 Hz, 1H), 7.00 (d, *J* = 8.4 Hz, 1H), 6.90–6.86 (m, 1H), 6.50 (s, 1H); <sup>13</sup>C NMR (CDCl<sub>3</sub>, 100 MHz) δ: 159.80 (d, *J* = 237.3 Hz), 136.18 (d, *J* = 12.4 Hz), 125.25 (d, *J* = 1.2 Hz), 120.42 (d, *J* = 9.8 Hz), 109.24 (d, *J* = 24.2 Hz), 108.27 (d, *J* = 3.2 Hz), 104.84, 96.97 (d, *J* = 26.4 Hz).

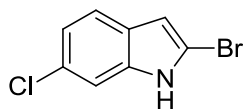

**8g**: <sup>1</sup>H NMR (CDCl<sub>3</sub>, 400 MHz) δ: 8.07 (s, 1H), 7.34 (d, *J* = 8.4 Hz, 1H), 7.18 (s, 1H), 7.00 (d, *J* = 8.4 Hz, 1H), 6.42 (s, 1H); <sup>13</sup>C NMR (CDCl<sub>3</sub>, 100 MHz) δ: 136.61, 128.19, 127.26, 121.29, 120.50, 110.34, 109.32, 104.96. HRMS (EI) ([M]<sup>+</sup>) Calcd. for C<sub>8</sub>H<sub>5</sub>NCIBr: 228.9294, Found: 228.9297.

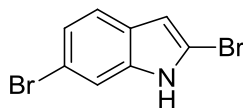

**8h**: <sup>1</sup>H NMR (CDCl<sub>3</sub>, 400 MHz) δ: 8.05 (s, 1H), 7.36 (s, 1H), 7.30 (d, *J* = 8.4 Hz, 1H), 7.13 (d, *J* = 8.4 Hz, 1H), 6.42 (s, 1H); <sup>13</sup>C NMR (CDCl<sub>3</sub>, 100 MHz) δ: 137.02, 127.57, 123.87, 120.82, 115.76, 113.23, 109.31, 105.03. HRMS (EI) ([M]<sup>+</sup>) Calcd. for C<sub>8</sub>H<sub>5</sub>NBr<sub>2</sub>: 272.8789, Found: 272.8792.

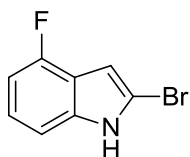

**8i**: <sup>1</sup>H NMR (CDCl<sub>3</sub>, 400 MHz) δ: 8.19 (s, 1H), 7.09–7.06 (m, 2H), 6.80–6.76 (m, 1H), 6.62 (d, *J* = 1.6 Hz, 1H); <sup>13</sup>C NMR (CDCl<sub>3</sub>, 100 MHz) δ: 159.80 (d, *J* = 237.3 Hz), 136.18 (d, *J* = 12.4 Hz), 125.25 (d, *J* = 1.2 Hz), 120.42 (d, *J* = 9.9 Hz), 109.24 (d, *J* = 24.2 Hz), 108.27 (d, *J* = 3.2 Hz), 104.84, 96.97 (d, *J* = 26.3 Hz). HRMS (EI) ([M]<sup>+</sup>) Calcd. for C<sub>8</sub>H<sub>5</sub>NFBr: 212.9589, Found: 212.9592.

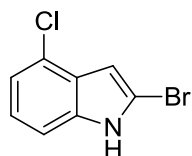

**8j:**  $^1\text{H}$  NMR ( $\text{CDCl}_3$ , 400 MHz)  $\delta$ : 8.31 (s, 1H), 7.16 (d,  $J = 7.6$  Hz, 1H), 7.10 (dd,  $J = 1.2, 7.6$  Hz, 1H), 7.07 (d,  $J = 7.6$  Hz, 1H), 6.64 (d,  $J = 1.2$  Hz, 1H);  $^{13}\text{C}$  NMR ( $\text{CDCl}_3$ , 100 MHz)  $\delta$ : 136.92, 127.57, 124.77, 122.79, 120.21, 109.44, 108.90, 103.48. HRMS (EI) ( $[\text{M}]^+$ ) Calcd. for  $\text{C}_8\text{H}_5\text{NClBr}$ : 228.9294, Found: 228.9296.

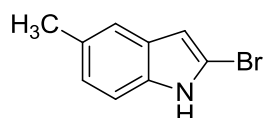

**8k:**  $^1\text{H}$  NMR ( $\text{CDCl}_3$ , 400 MHz)  $\delta$ : 7.91 (s, 1H), 7.30 (s, 1H), 7.14 (d,  $J = 8.0$  Hz, 1H), 6.98 (d,  $J = 8.4$  Hz, 1H), 6.43 (s, 1H), 2.41 (s, 3H);  $^{13}\text{C}$  NMR ( $\text{CDCl}_3$ , 100 MHz)  $\delta$ : 134.68, 129.73, 128.92, 123.74, 119.27, 109.94, 108.50, 104.35, 21.37. HRMS (EI) ( $[\text{M}]^+$ ) Calcd. for  $\text{C}_9\text{H}_8\text{NBr}$ : 208.9840, Found: 208.9842.

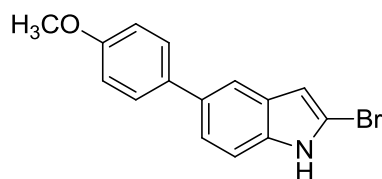

**8l:**  $^1\text{H}$  NMR ( $\text{CDCl}_3$ , 400 MHz)  $\delta$ : 8.09 (s, 1H), 7.68 (s, 1H), 7.54 (d,  $J = 7.2$  Hz, 2H), 7.38–7.31 (m, 2H), 6.98 (d,  $J = 7.2$  Hz, 2H), 6.56 (s, 1H), 3.85 (s, 3H);  $^{13}\text{C}$  NMR ( $\text{CDCl}_3$ , 100 MHz)  $\delta$ : 158.64, 135.61, 134.74, 133.77, 129.25, 128.30, 121.86, 117.62, 114.15, 110.46, 109.07, 105.12, 55.36. HRMS (EI) ( $[\text{M}]^+$ ) Calcd. for  $\text{C}_{15}\text{H}_{12}\text{NOBr}$ : 301.0102, Found: 301.0106.

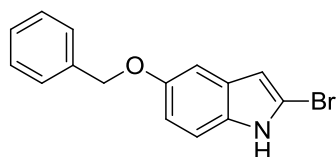

**8m:**  $^1\text{H}$  NMR ( $\text{CDCl}_3$ , 400 MHz)  $\delta$ : 7.86 (s, 1H), 7.37 (d,  $J = 7.6$  Hz, 2H), 7.31–7.27 (m, 2H), 7.23 (d,  $J = 6.8$  Hz, 1H), 7.05 (d,  $J = 8.8$  Hz, 1H), 6.97 (s, 1H), 6.80 (d,  $J = 8.8$  Hz, 1H), 6.34 (s, 1H), 4.98 (s, 2H);  $^{13}\text{C}$  NMR ( $\text{CDCl}_3$ , 100 MHz)  $\delta$ : 153.73, 137.51, 131.79, 129.20, 128.59, 127.89, 127.60, 113.08, 111.17, 109.02, 104.75, 103.25, 70.88. HRMS (EI) ( $[\text{M}]^+$ ) Calcd. for  $\text{C}_{15}\text{H}_{12}\text{NOBr}$ : 301.0102, Found: 301.0103.

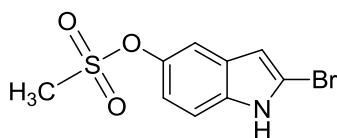

**8n:**  $^1\text{H}$  NMR ( $\text{CDCl}_3$ , 400 MHz)  $\delta$ : 8.41 (s, 1H), 7.45 (s, 1H), 7.30–7.27 (m, 1H), 7.09 (d,  $J$  = 8.8 Hz, 1H), 6.55 (s, 1H), 3.15 (s, 3H);  $^{13}\text{C}$  NMR ( $\text{CDCl}_3$ , 100 MHz)  $\delta$ : 143.46, 134.98, 128.98, 116.49, 112.63, 111.34, 110.84, 105.30, 36.98. HRMS (EI) ( $[\text{M}]^+$ ) Calcd. for  $\text{C}_{16}\text{H}_{15}\text{NO}_3\text{SBr}_2$ : 458.9139, Found: 458.9142.

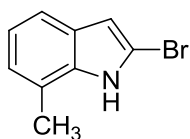

**8o:**  $^1\text{H}$  NMR ( $\text{CDCl}_3$ , 400 MHz)  $\delta$ : 7.99 (s, 1H), 7.37 (d,  $J$  = 7.6 Hz, 1H), 7.04–7.00 (m, 1H), 6.95 (d,  $J$  = 7.2 Hz, 1H), 6.52 (s, 1H), 2.42 (s, 3H);  $^{13}\text{C}$  NMR ( $\text{CDCl}_3$ , 100 MHz)  $\delta$ : 136.17, 128.36, 122.89, 120.73, 119.61, 117.41, 108.36, 105.40, 16.55. HRMS (EI) ( $[\text{M}]^+$ ) Calcd. for  $\text{C}_9\text{H}_8\text{NBr}$ : 208.9840, Found: 208.9841.

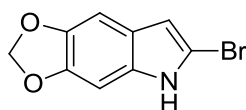

**8p:**  $^1\text{H}$  NMR ( $\text{CDCl}_3$ , 400 MHz)  $\delta$ : 7.99 (s, 1H), 6.93 (s, 1H), 6.78 (s, 1H), 6.40 (d,  $J$  = 1.6 Hz, 1H), 5.94 (s, 2H);  $^{13}\text{C}$  NMR ( $\text{CDCl}_3$ , 100 MHz)  $\delta$ : 144.92, 143.32, 131.19, 122.59, 105.32, 105.00, 100.64, 98.48, 91.59. HRMS (EI) ( $[\text{M}]^+$ ) Calcd. for  $\text{C}_9\text{H}_6\text{NO}_2\text{Br}$ : 238.9582, Found: 238.9587.

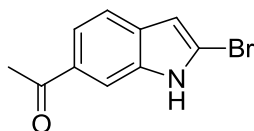

**8q:**  $^1\text{H}$  NMR ( $\text{CDCl}_3$ , 400 MHz)  $\delta$ : 9.09 (s, 1H), 8.03 (s, 1H), 7.73 (d,  $J$  = 8.4 Hz, 1H), 7.55 (d,  $J$  = 8.4 Hz, 1H), 6.58 (s, 1H), 2.66 (s, 3H).  $^{13}\text{C}$  NMR ( $\text{CDCl}_3$ , 100 MHz)  $\delta$ : 198.53, 136.07, 132.60, 131.40, 120.94, 119.22, 113.31, 111.24, 105.22, 26.79. HRMS (EI) ( $[\text{M}]^+$ ) Calcd. for  $\text{C}_{10}\text{H}_8\text{NOBr}$ : 236.9789, Found: 236.9794.

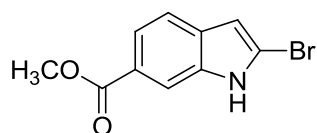

**8r**<sup>[2]</sup>: <sup>1</sup>H NMR (CDCl<sub>3</sub>, 400 MHz)  $\delta$ : 8.86 (s, 1H), 8.13 (s, 1H), 7.82 (d,  $J$  = 8.4 Hz, 1H), 7.56 (d,  $J$  = 8.4 Hz, 1H), 6.59 (s, 1H), 3.97 (s, 3H); <sup>13</sup>C NMR (CDCl<sub>3</sub>, 100 MHz)  $\delta$ : 168.14, 135.78, 132.37, 123.70, 121.51, 119.21, 112.69, 105.23, 52.19.

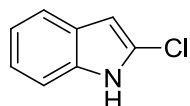

**8s**<sup>[3]</sup>: <sup>1</sup>H NMR (CDCl<sub>3</sub>, 400 MHz)  $\delta$ : 7.91 (s, 1H), 7.50 (d,  $J$  = 0.8 Hz, 1H), 7.23–7.11 (m, 3H), 6.39 (s, 1H). <sup>13</sup>C NMR (CDCl<sub>3</sub>, 100 MHz)  $\delta$ : 135.00, 128.16, 123.35, 122.29, 120.63, 119.89, 110.43, 100.79.

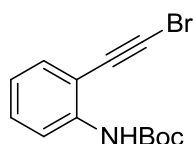

**A**: <sup>1</sup>H NMR (CDCl<sub>3</sub>, 400 MHz)  $\delta$ : 8.13 (d,  $J$  = 8.4 Hz, 1H), 7.39 (dd,  $J$  = 1.6, 8.4 Hz, 1H), 7.35–7.30 (m, 1H), 7.13 (s, 1H), 6.98–6.94 (m, 1H), 1.56 (s, 9H); <sup>13</sup>C NMR (CDCl<sub>3</sub>, 100 MHz)  $\delta$ : 152.35, 140.27, 132.41, 129.96, 122.09, 117.85, 110.65, 81.01, 75.93, 56.13, 28.29. HRMS (EI) ( $[M]^+$ ) Calcd. for C<sub>13</sub>H<sub>14</sub>NO<sub>2</sub>Br: 295.0208, Found: 295.0206.

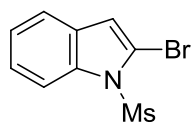

**9a**<sup>[4]</sup>: Colorless oil. <sup>1</sup>H NMR (400 Hz, CDCl<sub>3</sub>):  $\delta$  = 8.08 (d,  $J$  = 8.0 Hz, 1H), 7.50 (s, 1H), 7.33–7.28 (m, 2H), 6.83 (d,  $J$  = 6.0 Hz, 1H), 3.19 (s, 3H); <sup>13</sup>C NMR (100 Hz, CDCl<sub>3</sub>):  $\delta$  = 137.24, 129.40, 124.97, 124.07, 120.13, 114.76, 114.62, 109.45, 41.78.

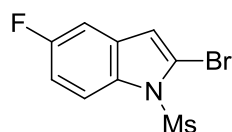

**9b**<sup>[4]</sup>: White solid, m.p. 75–77 °C. <sup>1</sup>H NMR (400 Hz, CDCl<sub>3</sub>):  $\delta$  = 8.06–8.02 (m, 1H), 7.18–7.16 (m, 1H), 7.07–7.03 (m, 1H), 6.82 (s, 1H), 3.22 (s, 3H); <sup>13</sup>C NMR (100 Hz, CDCl<sub>3</sub>):  $\delta$

= 159.8 (d,  $J = 240.3$  Hz), 133.5 (d,  $J = 1.3$  Hz), 130.2 (d,  $J = 10.1$  Hz), 116.0 (d,  $J = 9.1$  Hz), 114.2 (d,  $J = 3.9$  Hz), 112.8 (d,  $J = 25.0$  Hz), 111.1, 105.6 (d,  $J = 24.2$  Hz), 41.8.

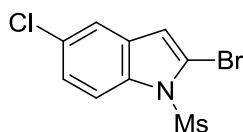

**9c:**<sup>[4]</sup> White solid, m.p. 116–118 °C.  $^1\text{H}$  NMR (400 Hz,  $\text{CDCl}_3$ ):  $\delta = 8.01$  (d,  $J = 8.8$  Hz, 1H), 7.48 (d,  $J = 1.2$  Hz, 1H), 7.28–7.26 (m, 1H), 6.80 (s, 1H), 3.23 (s, 3H);  $^{13}\text{C}$  NMR (100 Hz,  $\text{CDCl}_3$ ):  $\delta = 135.48, 130.39, 129.89, 125.10, 119.59, 115.82, 113.67, 110.90, 42.04$ .

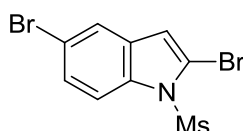

**9d:** White solid, m.p. 132–134 °C.  $^1\text{H}$  NMR (400 Hz,  $\text{CDCl}_3$ ):  $\delta = 7.95$  (d,  $J = 9.2$  Hz, 1H), 7.63 (s, 1H), 7.40 (d,  $J = 8.8$  Hz, 1H), 6.79 (s, 1H), 3.23 (s, 3H);  $^{13}\text{C}$  NMR (100 Hz,  $\text{CDCl}_3$ ):  $\delta = 135.83, 130.86, 127.76, 122.64, 117.51, 116.14, 113.52, 110.79, 42.08$ . HRMS (EI) ( $[\text{M}]^+$ ): calcd for  $\text{C}_9\text{H}_7\text{NO}_2\text{Br}_2\text{S}$ , 350.8564; found, 350.8566.

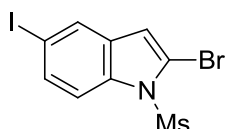

**9e:** White solid, m.p. 110–112 °C.  $^1\text{H}$  NMR (400 Hz,  $\text{CDCl}_3$ ):  $\delta = 7.85$  (d,  $J = 7.2$  Hz, 2H), 7.60–7.58 (m, 1H), 6.78 (s, 1H), 3.23 (s, 3H);  $^{13}\text{C}$  NMR (100 Hz,  $\text{CDCl}_3$ ):  $\delta = 136.45, 133.40, 131.40, 128.79, 116.47, 113.24, 110.46, 88.20, 42.07$ . HRMS (EI) ( $[\text{M}]^+$ ): calcd for  $\text{C}_9\text{H}_7\text{NO}_2\text{SBrI}$ , 398.8426; found, 398.8423.

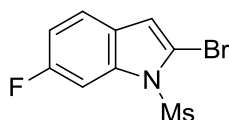

**9f:**<sup>[4]</sup> White solid, m.p. 97–99 °C.  $^1\text{H}$  NMR (400 Hz,  $\text{CDCl}_3$ ):  $\delta = 7.84$  (d,  $J = 10.4$  Hz, 1H), 7.45–7.42 (m, 1H), 7.07–7.02 (m, 1H), 6.82 (s, 1H), 3.25 (s, 3H);  $^{13}\text{C}$  NMR (100 Hz,  $\text{CDCl}_3$ ):  $\delta = 160.84$  (d,  $J = 241.1$  Hz), 137.12 (d,  $J = 12.7$  Hz), 125.59 (d,  $J = 1.6$  Hz), 120.78 (d,  $J = 9.7$  Hz), 114.13 (d,  $J = 1.2$  Hz), 112.52 (d,  $J = 24.1$  Hz), 108.93 (d,  $J = 3.8$  Hz), 102.39 (d,  $J = 29.6$  Hz).



Hz), 42.06.

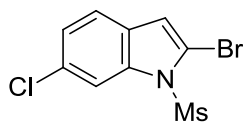

**9g:**<sup>[4]</sup> White solid, m.p. 137–139 °C. <sup>1</sup>H NMR (400 Hz, CDCl<sub>3</sub>): δ = 8.13 (s, 1H), 7.42 (d, *J* = 8.4 Hz, 1H), 7.27 (d, *J* = 7.2 Hz, 1H), 6.82 (s, 1H), 3.26 (s, 3H); <sup>13</sup>C NMR (100 Hz, CDCl<sub>3</sub>): δ = 137.24, 131.08, 127.75, 124.73, 120.78, 114.96, 114.06, 109.88, 42.16.

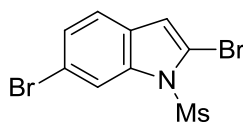

**9h:** White solid, m.p. 123–125 °C. <sup>1</sup>H NMR (400 Hz, CDCl<sub>3</sub>): δ = 8.27 (s, 1H), 7.41–7.35 (m, 2H), 6.81 (s, 1H), 3.25 (s, 3H); <sup>13</sup>C NMR (100 Hz, CDCl<sub>3</sub>): δ = 137.53, 128.10, 127.40, 121.11, 118.75, 117.74, 114.10, 109.92, 42.20. HRMS (EI) ([M]<sup>+</sup>): calcd for C<sub>9</sub>H<sub>7</sub>NO<sub>2</sub>SBr, 350.8564; found, 350.8561.

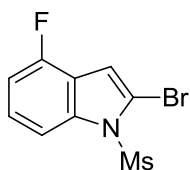

**9i:** White solid, m.p. 104–106 °C. <sup>1</sup>H NMR (400 Hz, CDCl<sub>3</sub>): δ = 7.87 (d, *J* = 8.8 Hz, 1H), 7.28–7.22 (m, 1H), 6.99–6.95 (m, 2H), 3.25 (s, 3H); <sup>13</sup>C NMR (100 Hz, CDCl<sub>3</sub>): δ = 154.55 (d, *J* = 248.1 Hz), 139.02 (d, *J* = 8.8 Hz), 125.61 (d, *J* = 7.5 Hz), 118.58 (d, *J* = 22.4 Hz), 110.80 (d, *J* = 4.1 Hz), 109.78, 109.31 (d, *J* = 2.3 Hz), 109.16, 42.07. HRMS (EI) ([M]<sup>+</sup>): calcd for C<sub>9</sub>H<sub>7</sub>NO<sub>2</sub>SFBr, 290.9365; found, 290.9359.

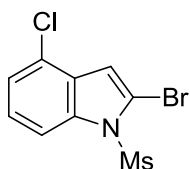

**9j:**<sup>[4]</sup> White solid, m.p. 109–111 °C. <sup>1</sup>H NMR (400 Hz, CDCl<sub>3</sub>): δ = 8.00 (d, *J* = 7.6 Hz, 1H), 7.29–7.22 (m, 2H), 6.99 (d, *J* = 1.2 Hz, 1H), 3.25 (s, 3H); <sup>13</sup>C NMR (100 Hz, CDCl<sub>3</sub>): δ = 137.66, 128.21, 125.56, 125.25, 123.80, 113.20, 112.51, 110.28, 42.16.

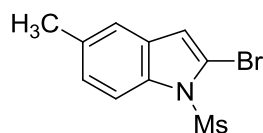

**9k:** White solid, m.p. 107–109 °C.  $^1\text{H}$  NMR (400 Hz,  $\text{CDCl}_3$ ):  $\delta$  = 7.95 (d,  $J$  = 8.8 Hz, 1H), 7.29 (s, 1H), 7.14 (d,  $J$  = 8.8 Hz, 1H), 6.77 (s, 1H), 3.16 (s, 3H), 2.44 (s, 3H);  $^{13}\text{C}$  NMR (100 Hz,  $\text{CDCl}_3$ ):  $\delta$  = 135.51, 133.78, 129.63, 126.32, 119.95, 114.53, 114.47, 109.36, 41.47, 21.17. HRMS (EI) ( $[\text{M}]^+$ ): calcd for  $\text{C}_{10}\text{H}_{10}\text{NO}_2\text{SBr}$ : 286.9616, found: 286.9618.

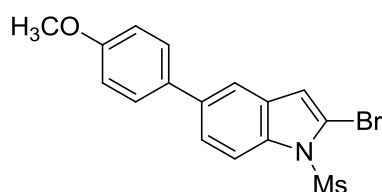

**9l:** White solid, m.p. 153–155 °C.  $^1\text{H}$  NMR (400 Hz,  $\text{CDCl}_3$ ):  $\delta$  = 8.11 (d,  $J$  = 8.0 Hz, 1H), 7.65 (s, 1H), 7.56–7.50 (m, 3H), 7.00 (d,  $J$  = 8.0 Hz, 2H), 6.88 (s, 1H), 3.87 (s, 3H), 3.22 (s, 3H);  $^{13}\text{C}$  NMR (100 Hz,  $\text{CDCl}_3$ ):  $\delta$  = 159.19, 137.16, 136.26, 133.29, 129.93, 128.31, 124.10, 117.85, 114.97, 114.81, 114.32, 109.85, 55.39, 41.73. HRMS (EI) ( $[\text{M}]^+$ ): calcd for  $\text{C}_{16}\text{H}_{14}\text{NO}_3\text{SBr}$ , 378.9878; found, 378.9879.

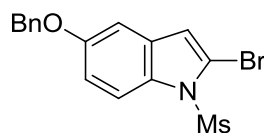

**9m:** White solid, m.p. 124–126 °C.  $^1\text{H}$  NMR (400 Hz,  $\text{CDCl}_3$ ):  $\delta$  = 7.98 (d,  $J$  = 8.8 Hz, 1H), 7.47 (d,  $J$  = 7.2 Hz, 2H), 7.43–7.39 (t,  $J$  = 7.2 Hz, 2H), 7.37–7.33 (t,  $J$  = 7.2 Hz, 1H), 7.02 (d,  $J$  = 9.2 Hz, 2H), 6.77 (s, 1H), 5.11 (s, 2H), 3.15 (s, 3H);  $^{13}\text{C}$  NMR (100 Hz,  $\text{CDCl}_3$ ):  $\delta$  = 155.88, 136.87, 132.03, 130.31, 128.65, 128.06, 127.49, 115.82, 114.67, 114.48, 109.95, 103.85, 70.52, 41.44. HRMS (EI) ( $[\text{M}]^+$ ): calcd for  $\text{C}_{16}\text{H}_{14}\text{NO}_3\text{SBr}$ , 378.9878; found, 378.9883.

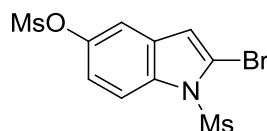

**9n:** White solid, m.p. 167–168 °C.  $^1\text{H}$  NMR (400 Hz,  $\text{CDCl}_3$ ):  $\delta$  = 8.14 (d,  $J$  = 9.2 Hz, 1H), 7.47 (d,  $J$  = 1.2 Hz, 1H), 7.24–7.21 (dd,  $J_1$  = 9.2 Hz,  $J_2$  = 2.0 Hz, 1H), 6.87 (s, 1H), 3.27 (s, 3H), 3.19 (s, 3H);  $^{13}\text{C}$  NMR (100 Hz,  $\text{CDCl}_3$ ):  $\delta$  = 145.51, 135.56, 130.10, 118.78, 116.02, 114.06,

113.35, 111.48, 42.23, 37.43. HRMS (EI) ( $[M]^+$ ): calcd for  $C_{10}H_{10}NO_5S_2Br$ , 366.9184; found, 366.9188.

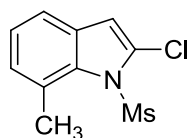

**9o:**  $^1H$  NMR ( $CDCl_3$ , 400 MHz)  $\delta$ : 7.93 (s, 1H), 7.34 (d,  $J = 7.6$  Hz, 1H), 7.13–7.02 (m, 1H), 6.91 (d,  $J = 7.6$  Hz, 1H), 3.49 (s, 3H), 2.44 (s, 3H);  $^{13}C$  NMR ( $CDCl_3$ , 100 MHz)  $\delta$ : 136.57, 128.41, 122.19, 120.90, 119.31, 117.21, 111.16, 104.42, 41.37, 16.95. HRMS (EI) ( $[M]^+$ ): calcd for  $C_{10}H_{10}NO_2SBr$ : 286.9616, found: 286.9621.

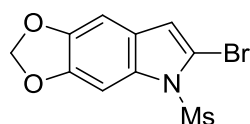

**9p:**<sup>[4]</sup> White solid.  $^1H$  NMR (400 Hz,  $CDCl_3$ ):  $\delta = 7.61$  (s, 1H), 6.86 (s, 1H), 6.70 (s, 1H), 6.00 (s, 2H), 3.16 (s, 3H);  $^{13}C$  NMR (100 Hz,  $CDCl_3$ ):  $\delta = 146.69$ , 145.41, 132.02, 123.64, 114.78, 106.41, 101.41, 98.79, 96.82, 41.51.

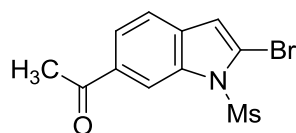

**9q:** White solid.  $^1H$  NMR (400 Hz,  $CDCl_3$ ):  $\delta = 8.71$  (s, 1H), 7.92 (d,  $J = 8.0$  Hz, 1H), 7.57 (d,  $J = 8.4$  Hz, 1H), 6.90 (s, 1H), 3.30 (s, 3H), 2.68 (s, 3H);  $^{13}C$  NMR (100 Hz,  $CDCl_3$ ):  $\delta = 197.49$ , 136.78, 133.91, 132.85, 123.85, 119.98, 115.46, 114.20, 113.02, 42.35, 26.72. HRMS (EI) ( $[M]^+$ ): calcd for  $C_{11}H_{10}NO_3SBr$ , 314.9565; found, 314.9564.

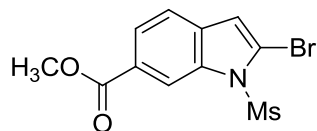

**9r:**<sup>[4]</sup> White solid, m.p. 158–160 °C.  $^1H$  NMR (400 Hz,  $CDCl_3$ ):  $\delta = 8.77$  (s, 1H), 7.98 (d,  $J = 8.0$  Hz, 1H), 7.55 (d,  $J = 8.4$  Hz, 1H), 6.89 (s, 1H), 3.95 (s, 3H), 3.29 (s, 3H);  $^{13}C$  NMR (100 Hz,  $CDCl_3$ ):  $\delta = 167.02$ , 136.56, 132.79, 126.68, 125.19, 119.79, 116.31, 114.19, 112.77, 52.28, 42.28.

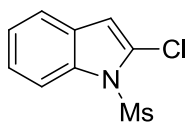

**9s:** Colorless oil.  $^1\text{H}$  NMR (400 Hz,  $\text{CDCl}_3$ ):  $\delta$  = 8.07 (d,  $J$  = 8.0 Hz, 1H), 7.51 (d,  $J$  = 7.2 Hz, 1H), 7.36–7.27 (m, 2H), 6.70 (s, 1H), 3.22 (s, 3H);  $^{13}\text{C}$  NMR (100 Hz,  $\text{CDCl}_3$ ):  $\delta$  = 136.25, 128.20, 124.95, 124.26, 124.13, 120.24, 114.54, 109.75, 41.77. HRMS (EI) ( $[\text{M}]^+$ ): calcd for  $\text{C}_9\text{H}_8\text{NO}_2\text{SCl}$ , 228.9964; found, 228.9965.

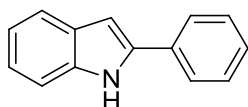

**10a<sup>[1]</sup>:**  $^1\text{H}$  NMR ( $\text{CDCl}_3$ , 400 MHz)  $\delta$ : 8.33 (s, 1H), 7.49–7.46 (m, 3H), 7.42 (d,  $J$  = 8.0 Hz, 2H), 7.38–7.34 (m, 1H), 7.27–7.23 (m, 2H), 7.19–7.16 (m, 1H), 6.87 (s, 1H);  $^{13}\text{C}$  NMR ( $\text{CDCl}_3$ , 100 MHz)  $\delta$ : 137.92, 136.86, 132.41, 129.31, 129.04, 127.73, 125.19, 122.38, 120.70, 120.31, 110.94, 100.03.

## 6. $^1\text{H}$ and $^{13}\text{C}$ NMR spectra of compounds

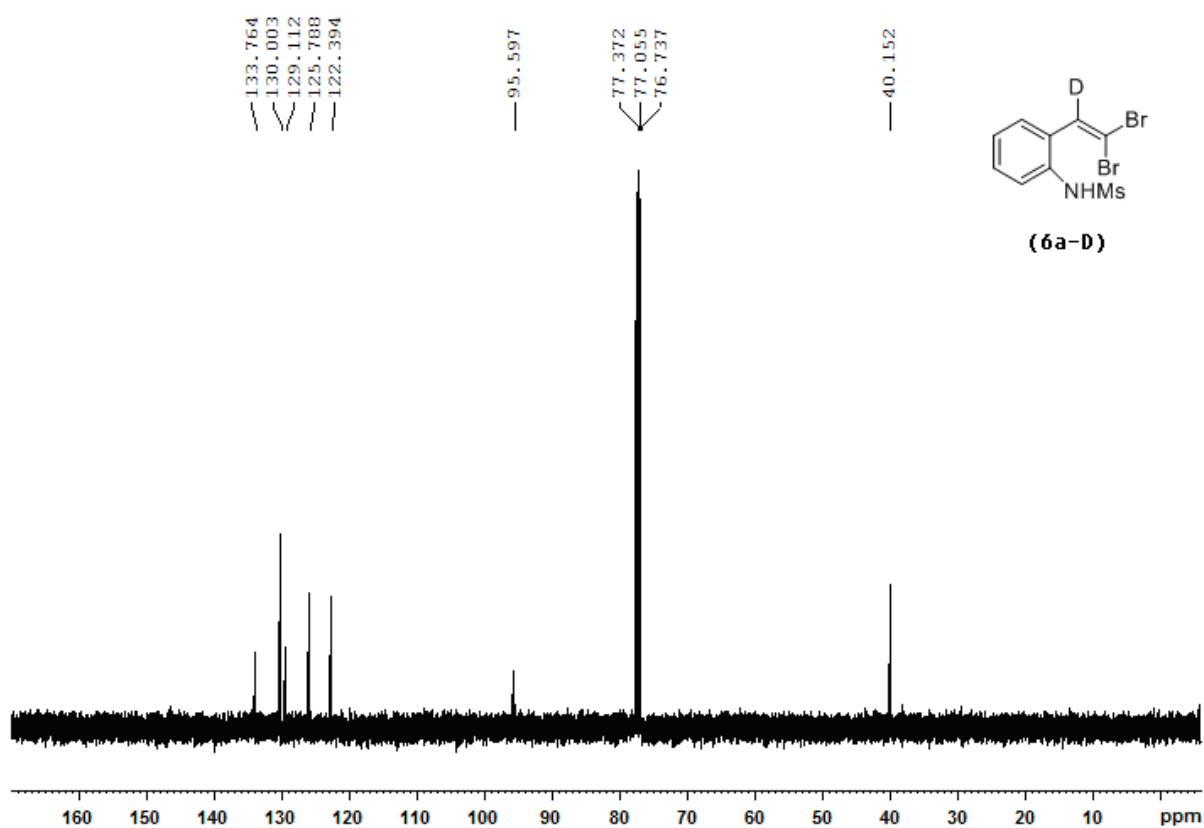

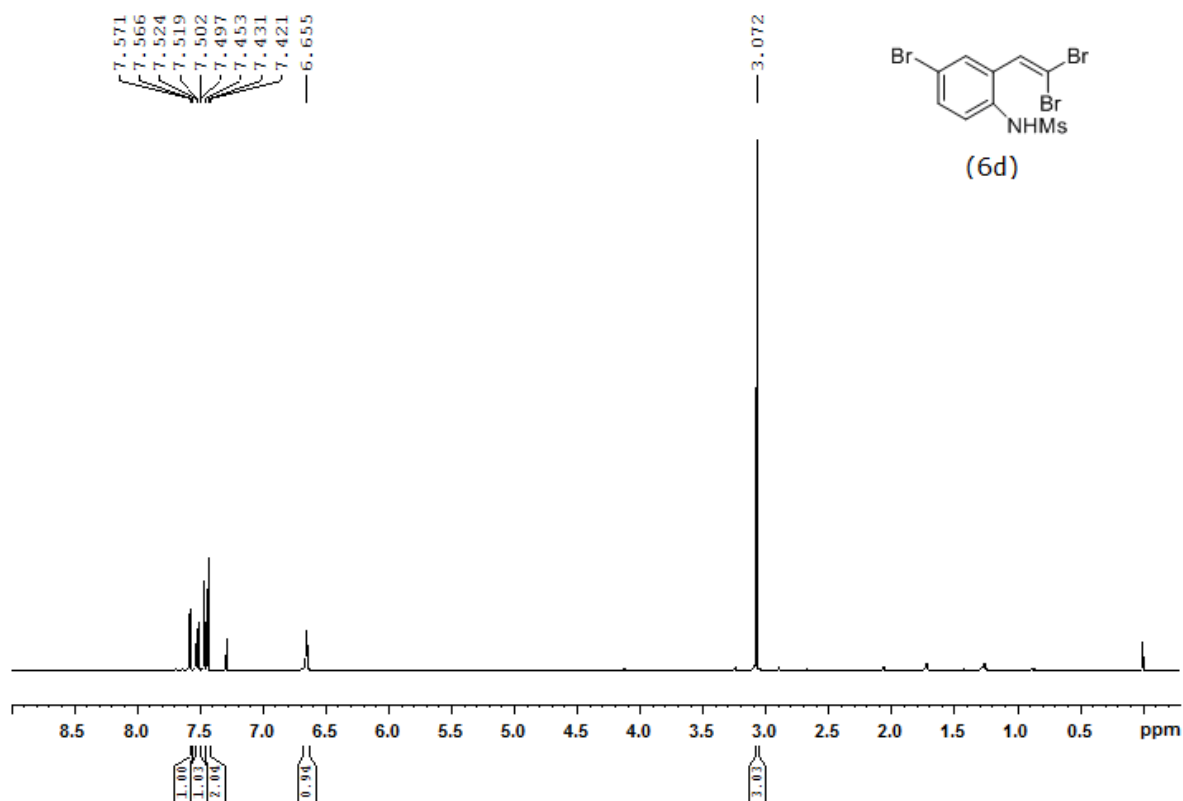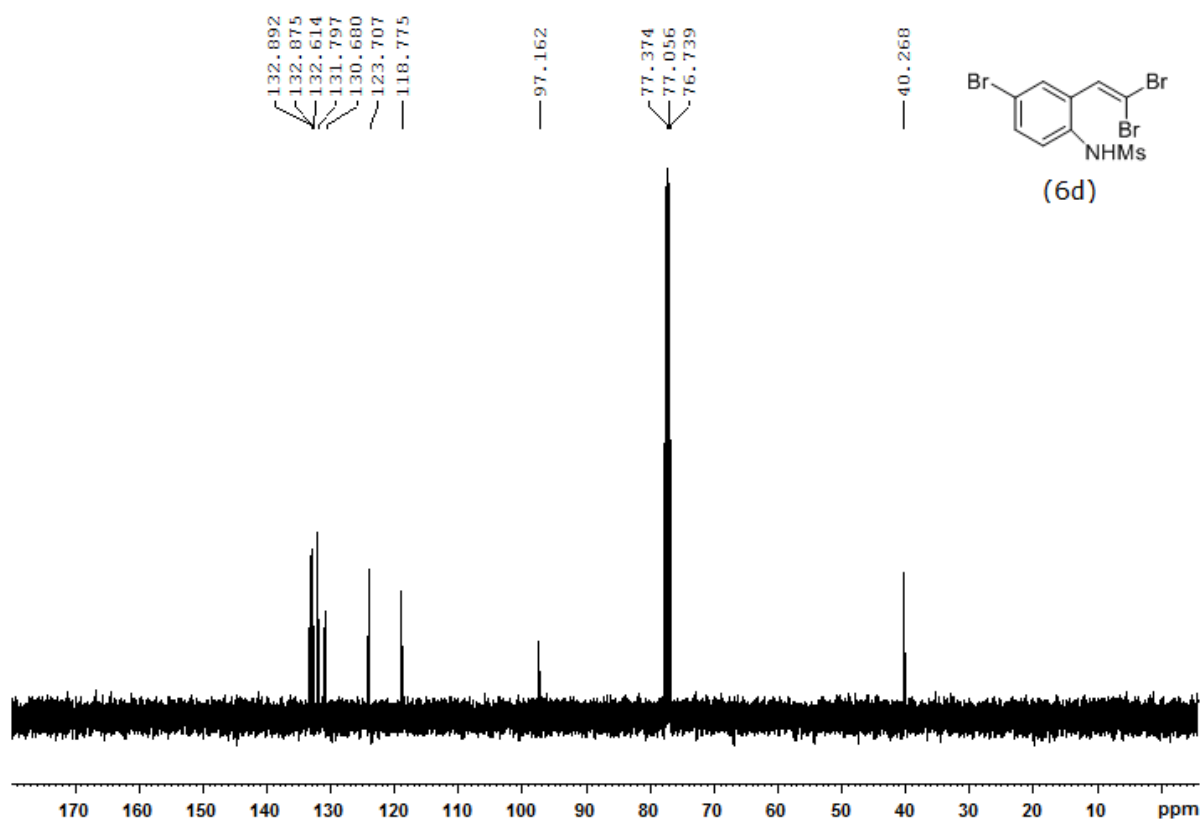

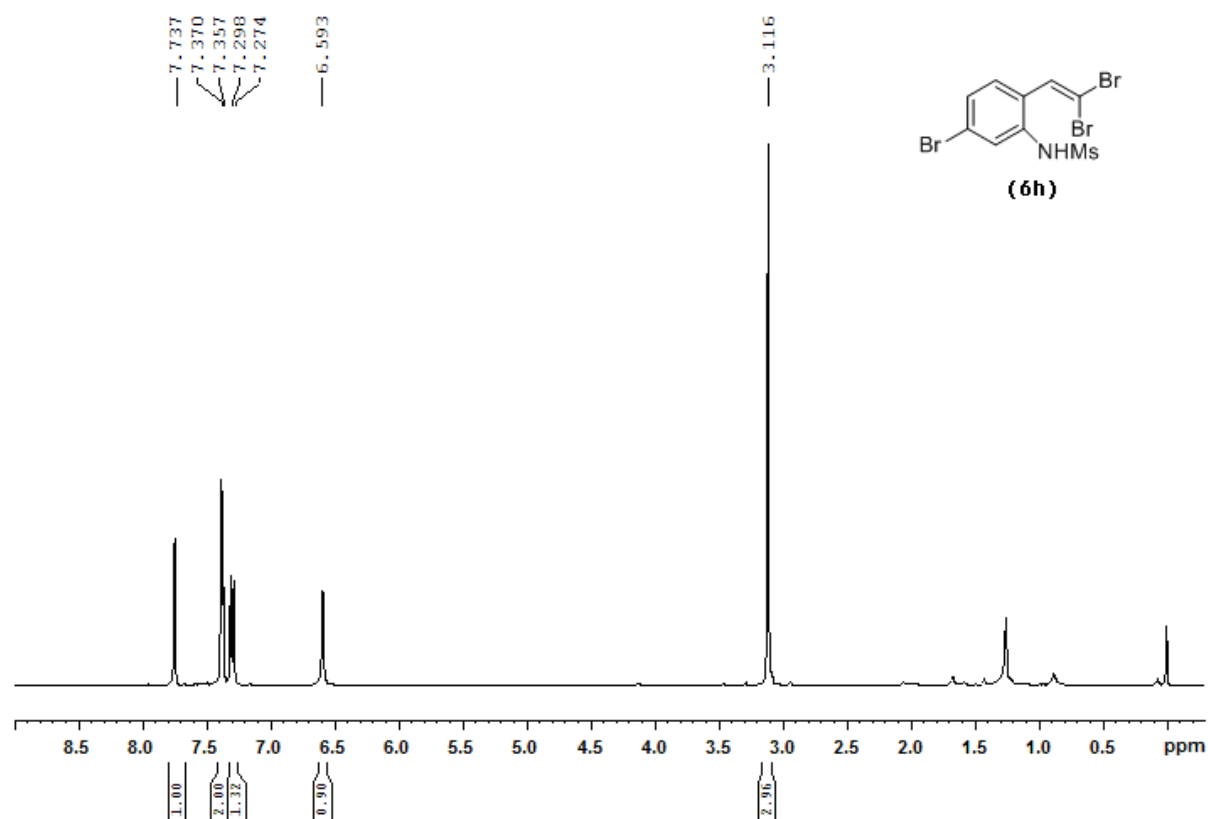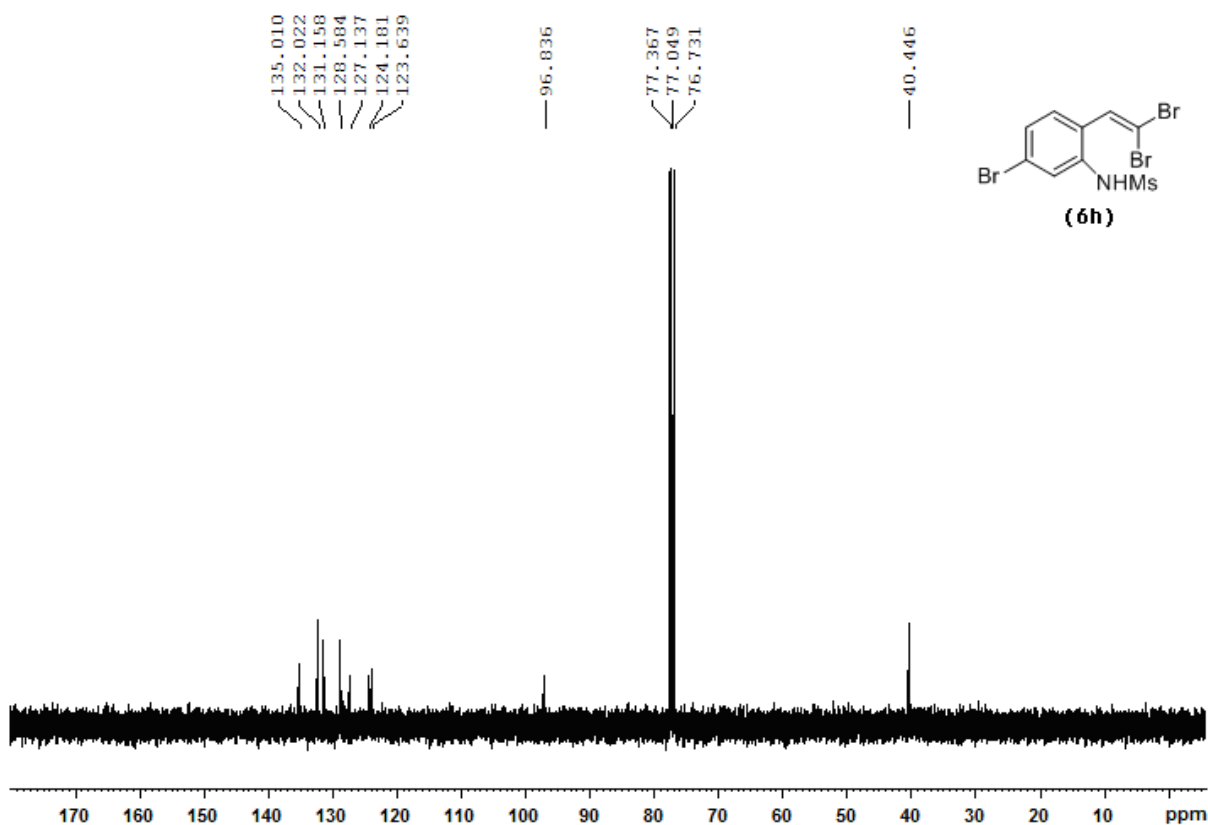

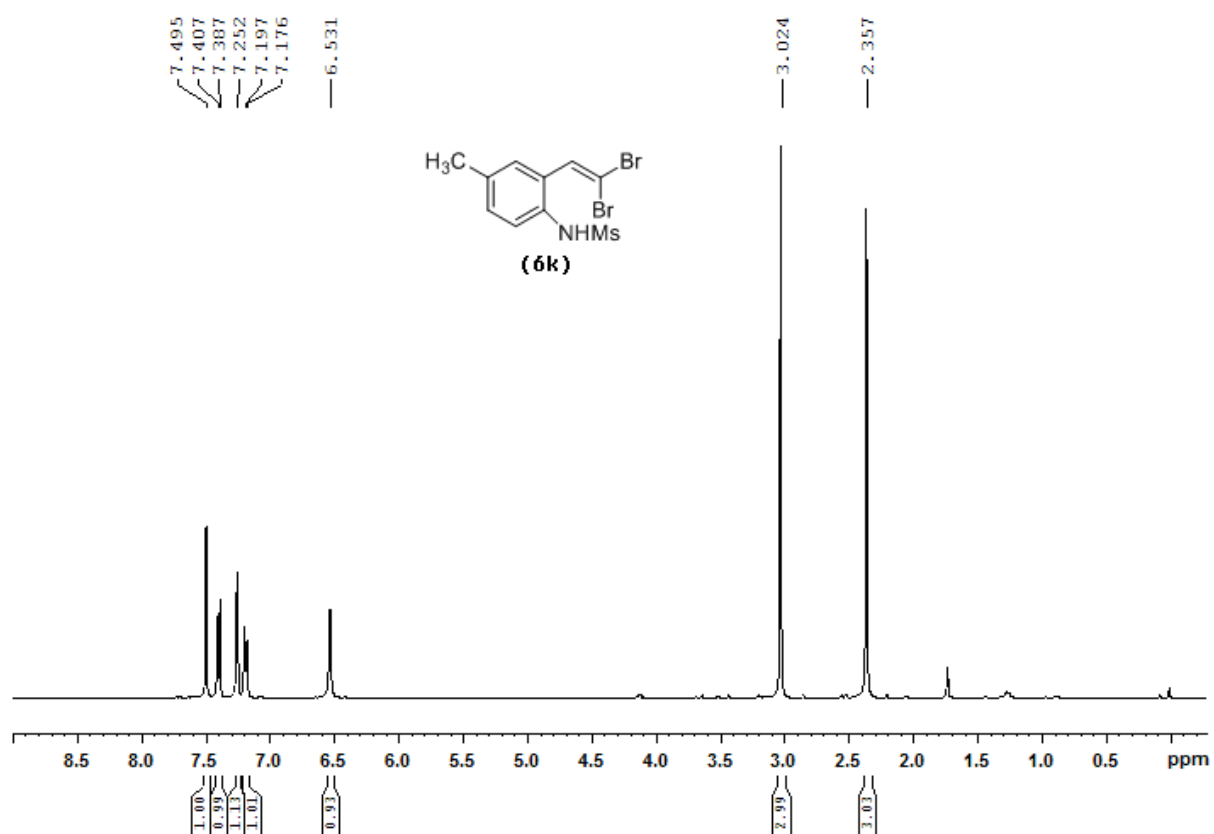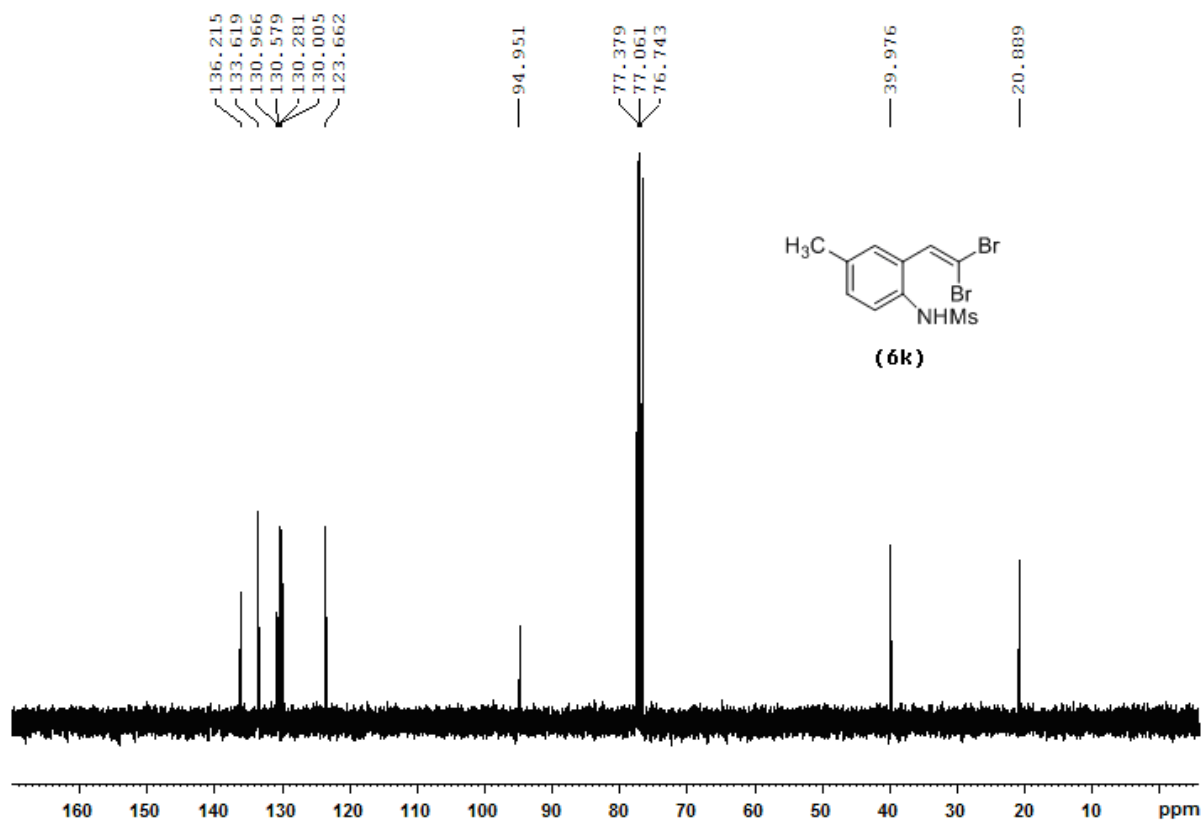



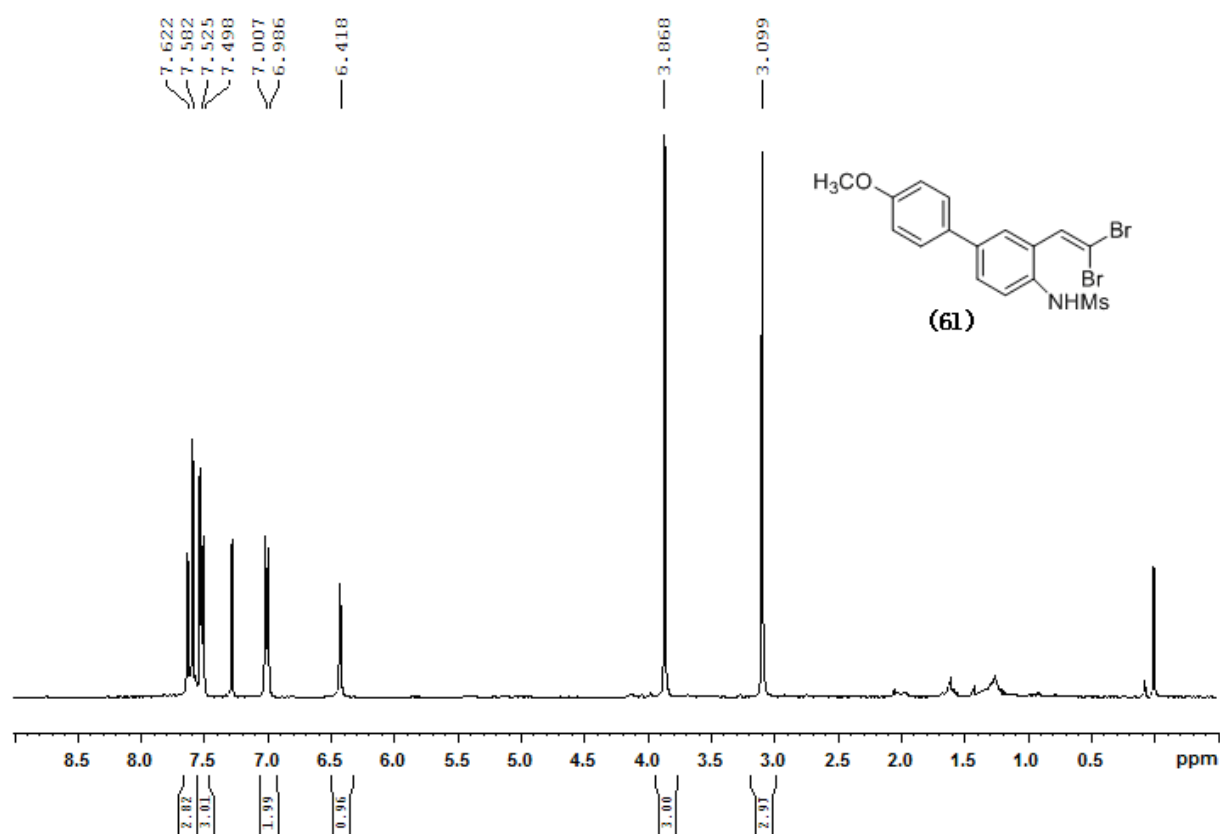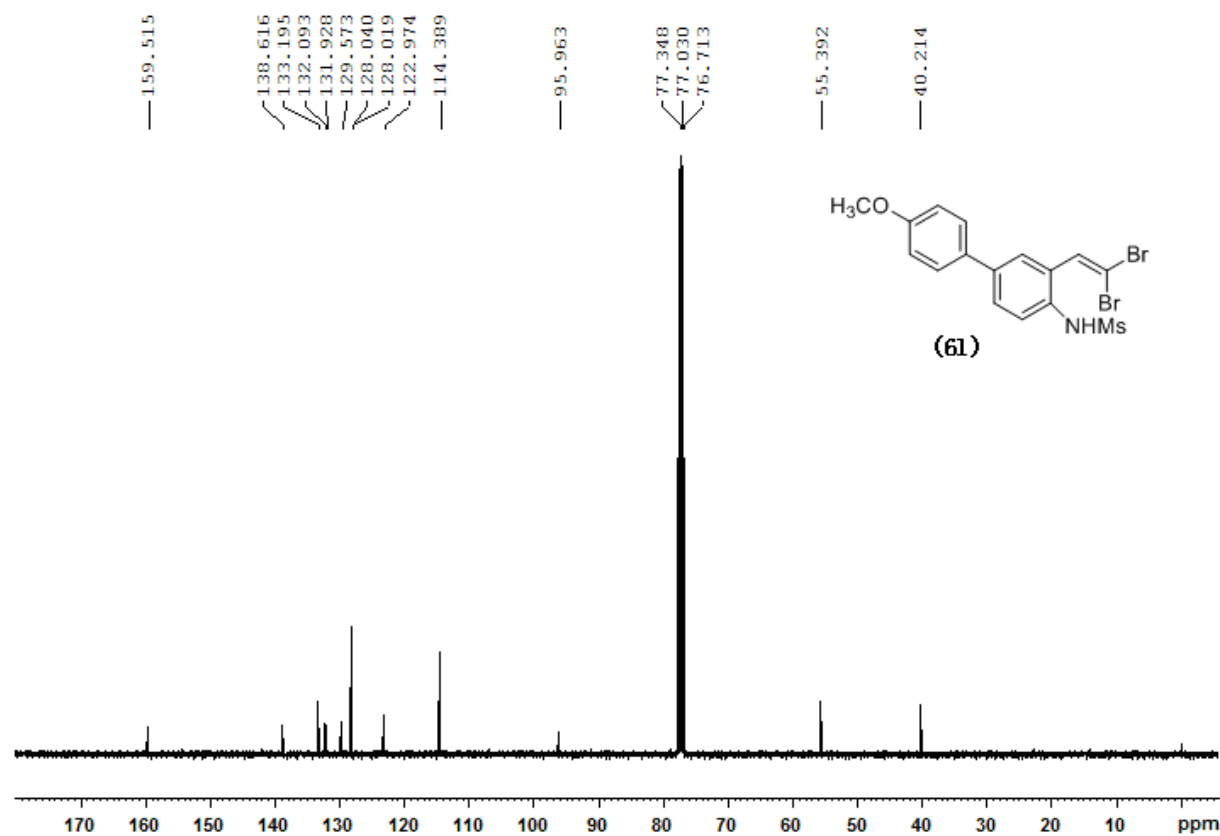

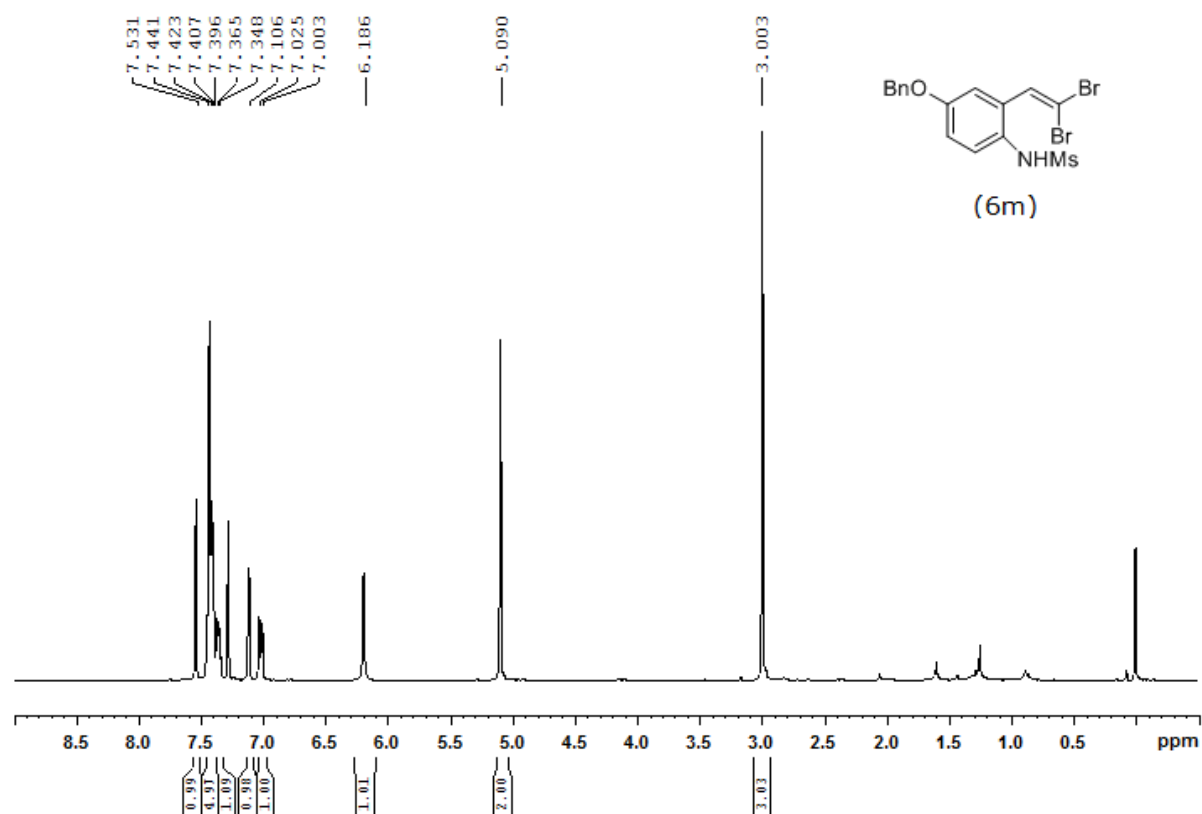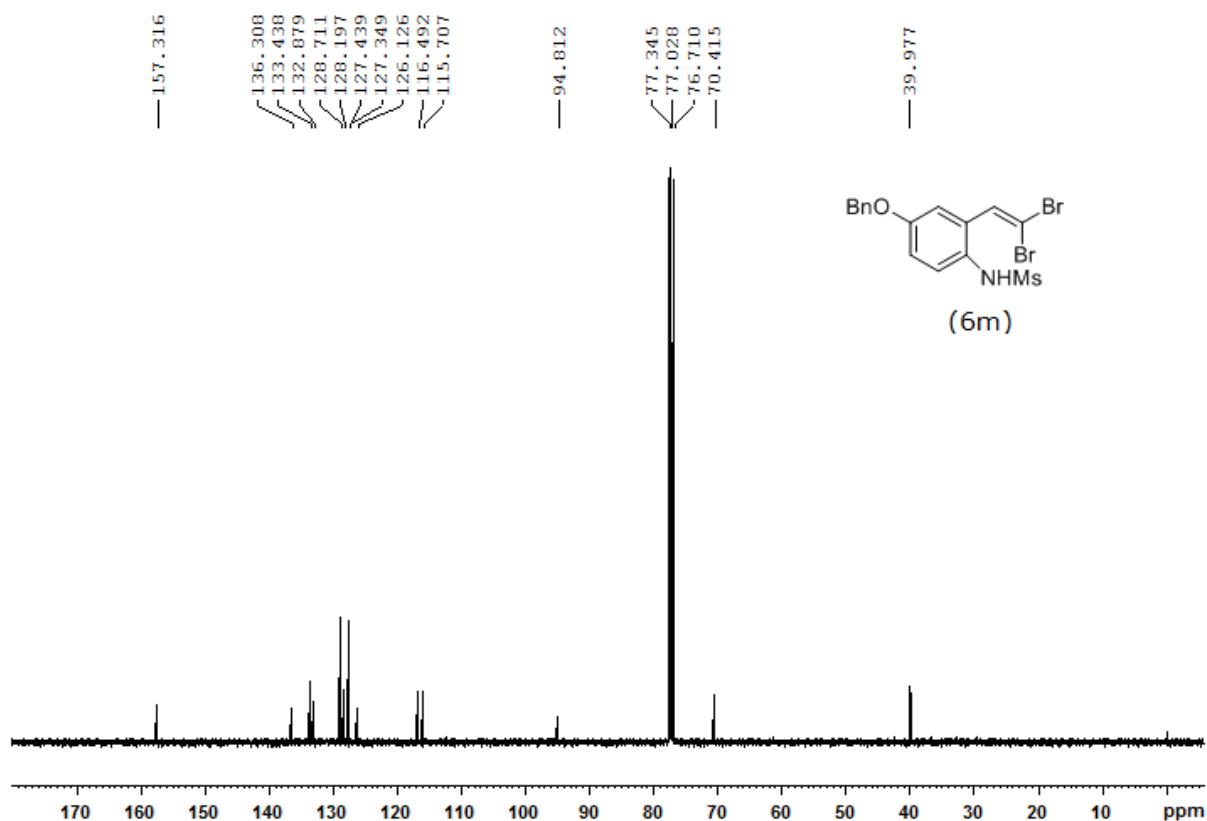

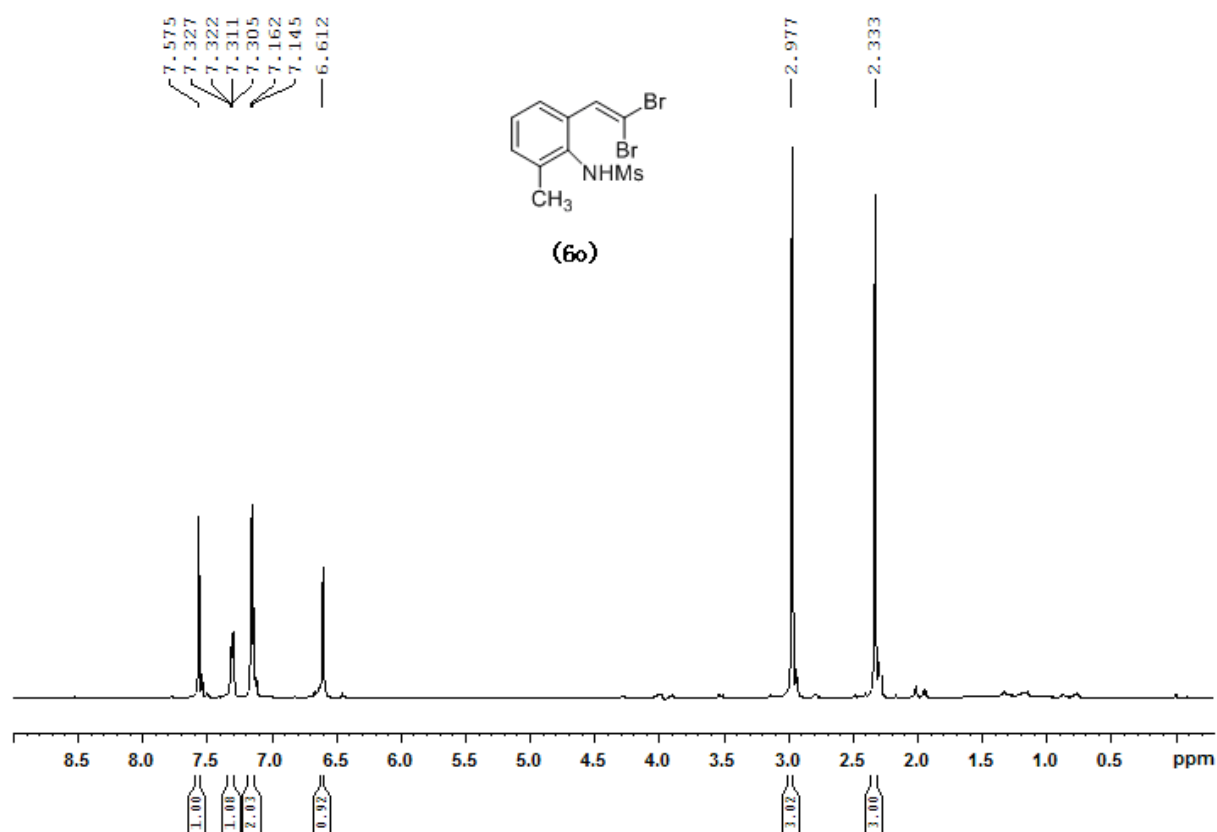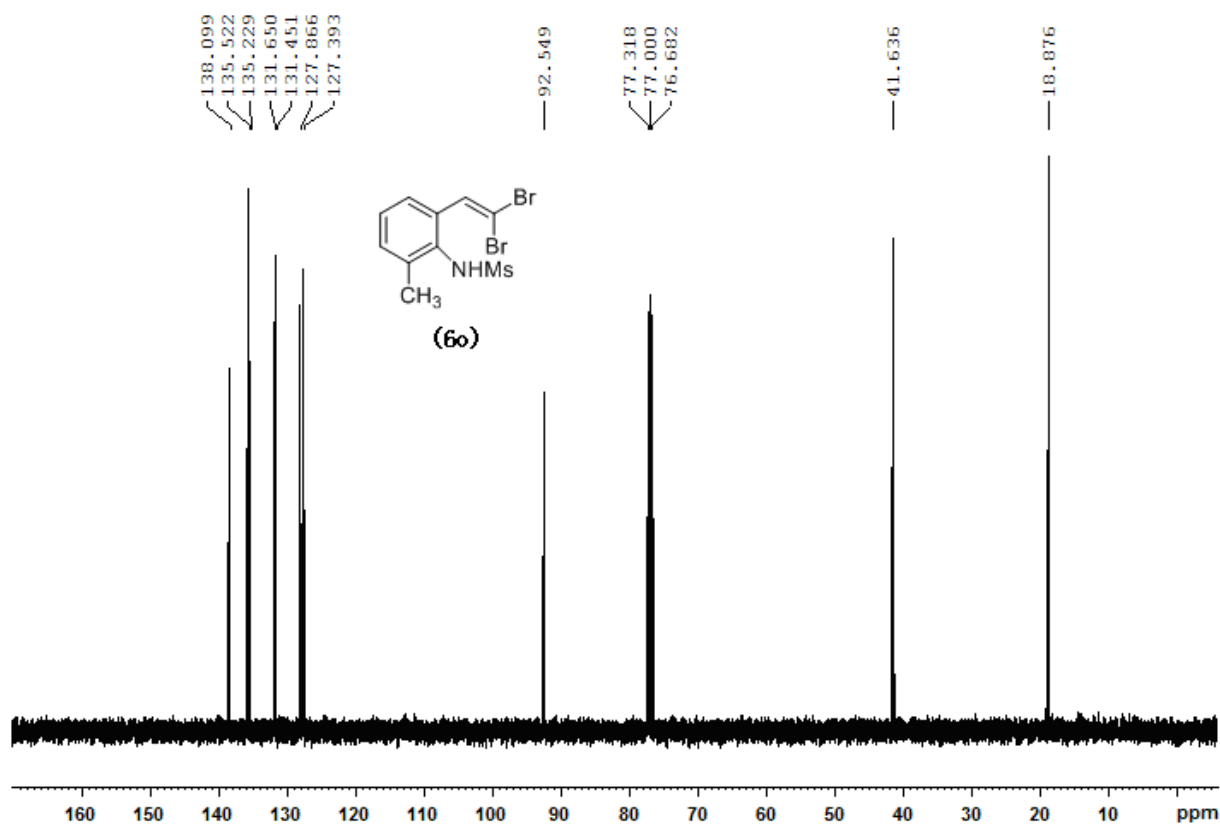

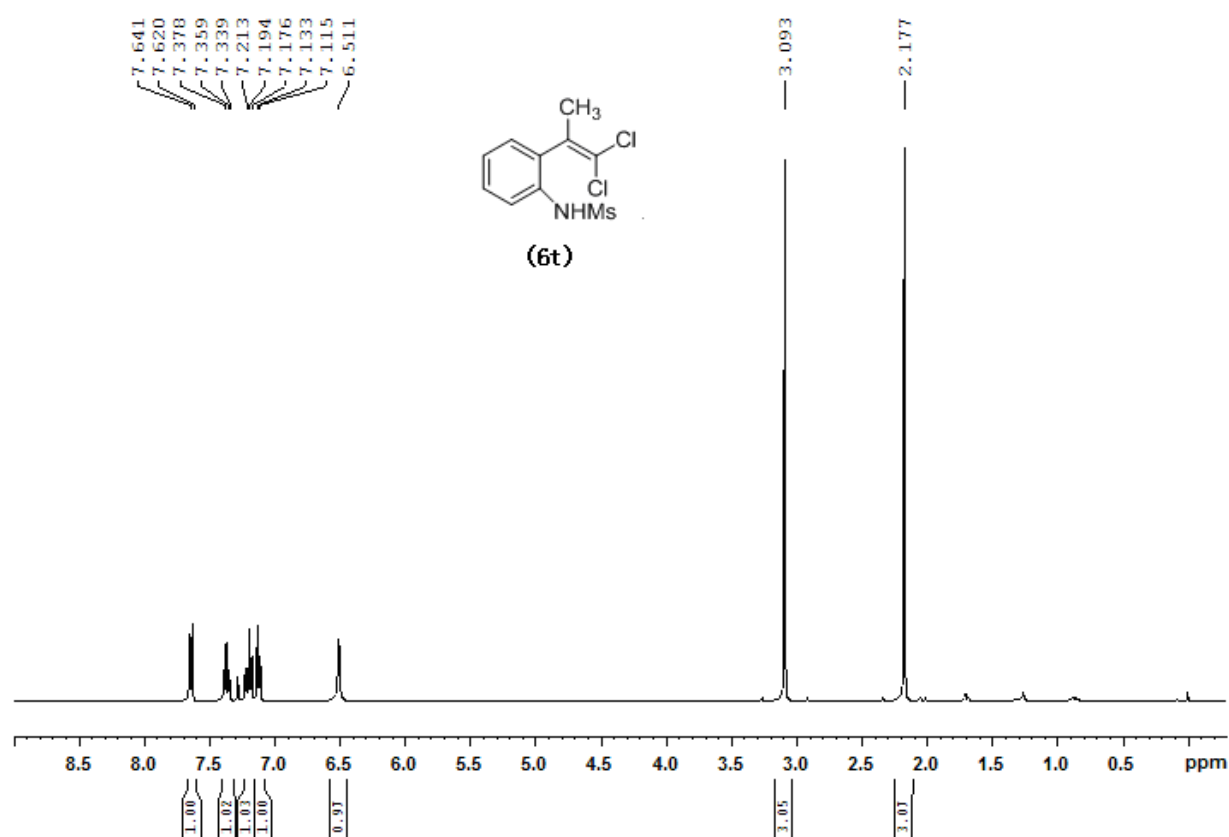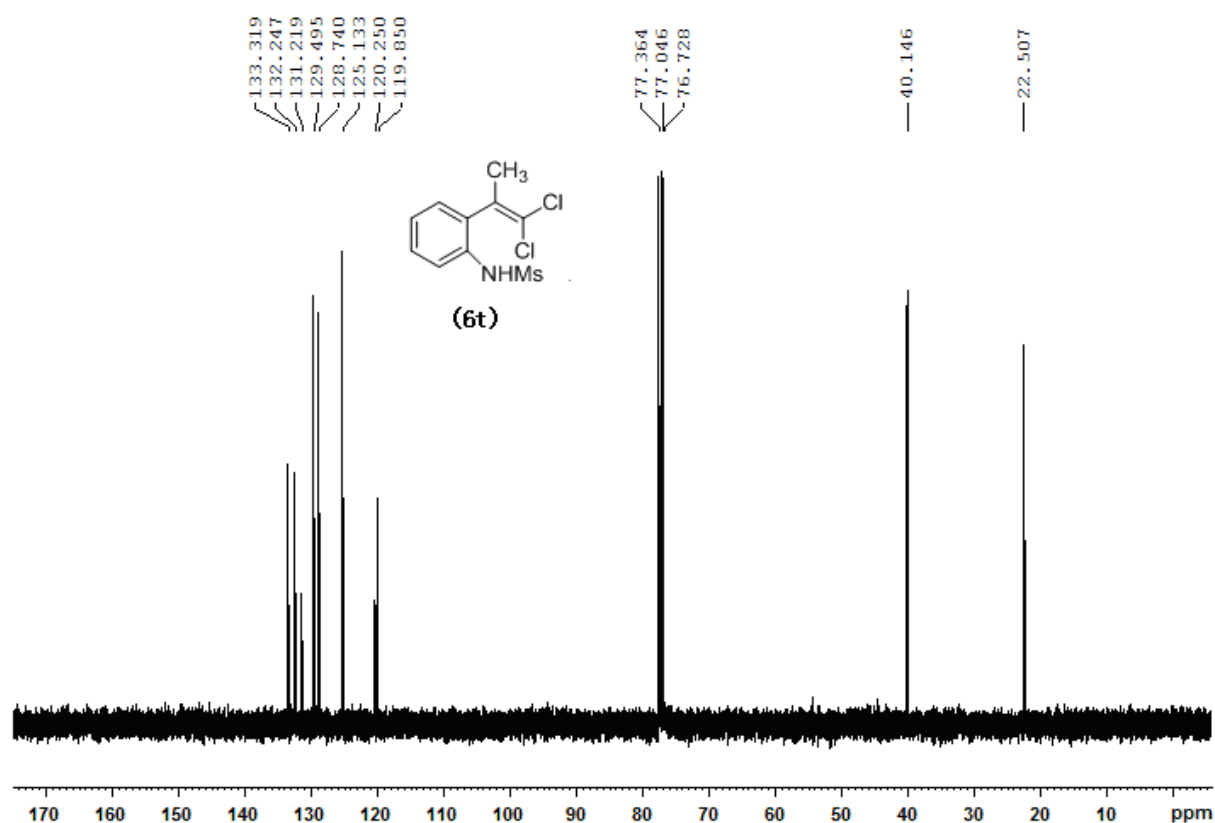

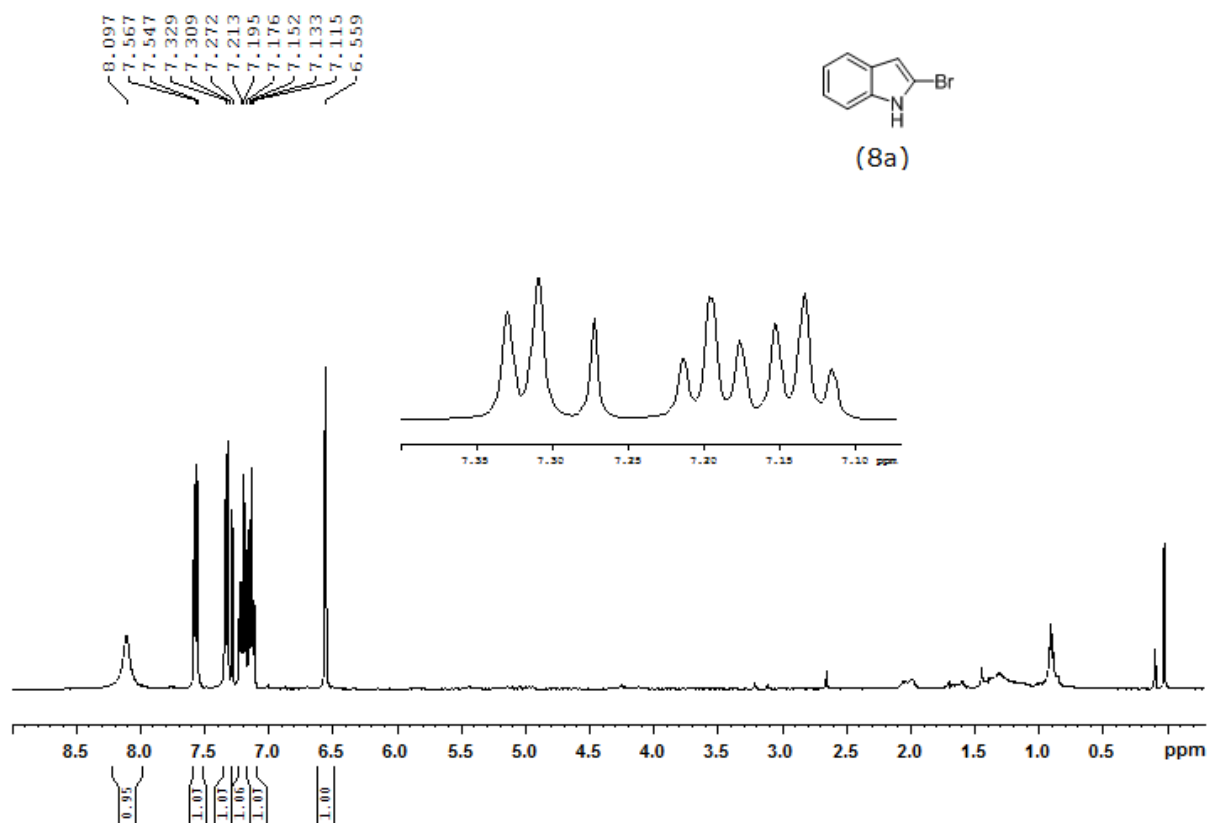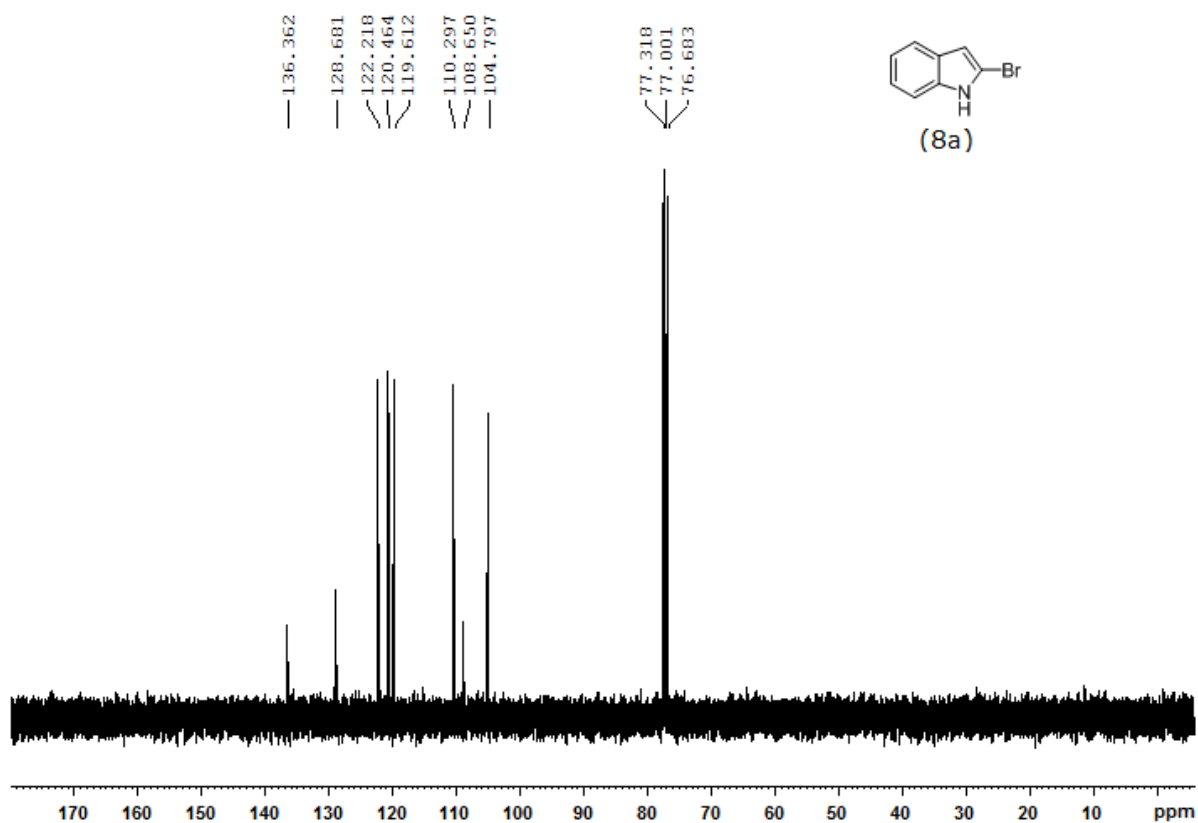

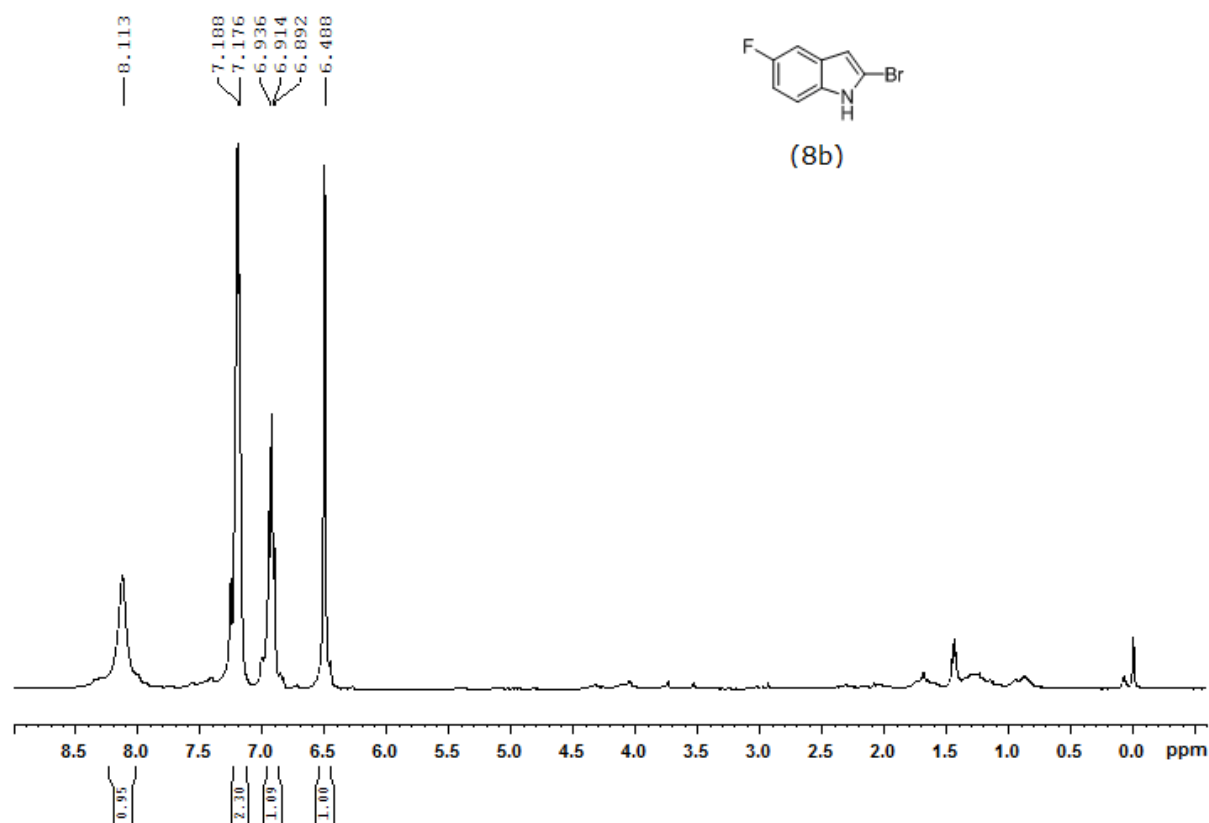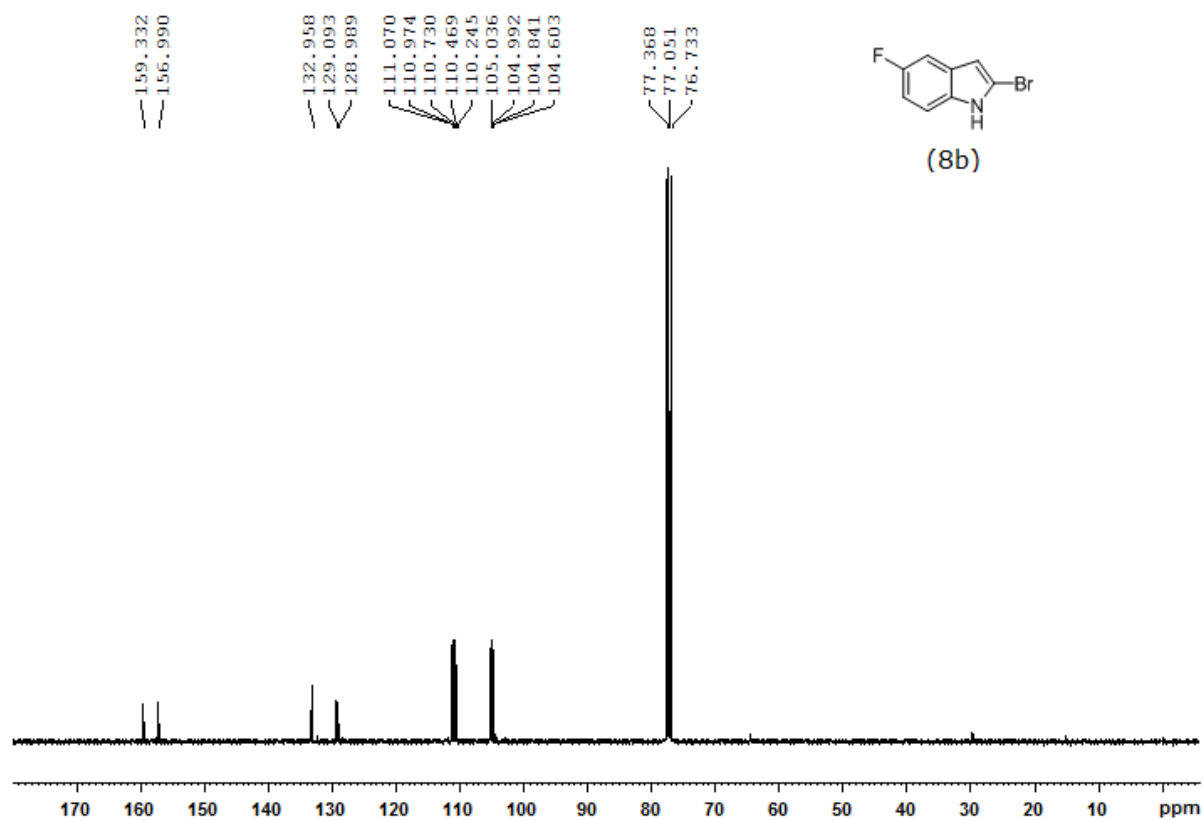

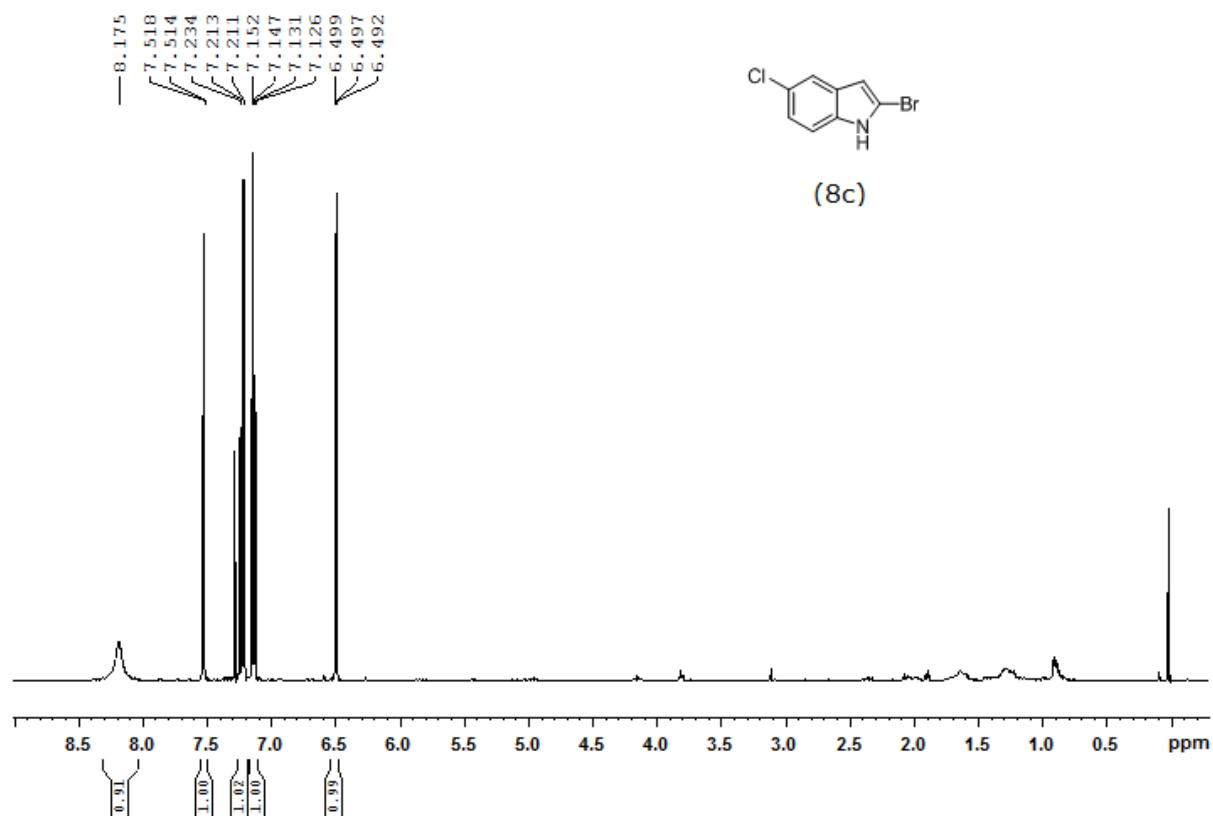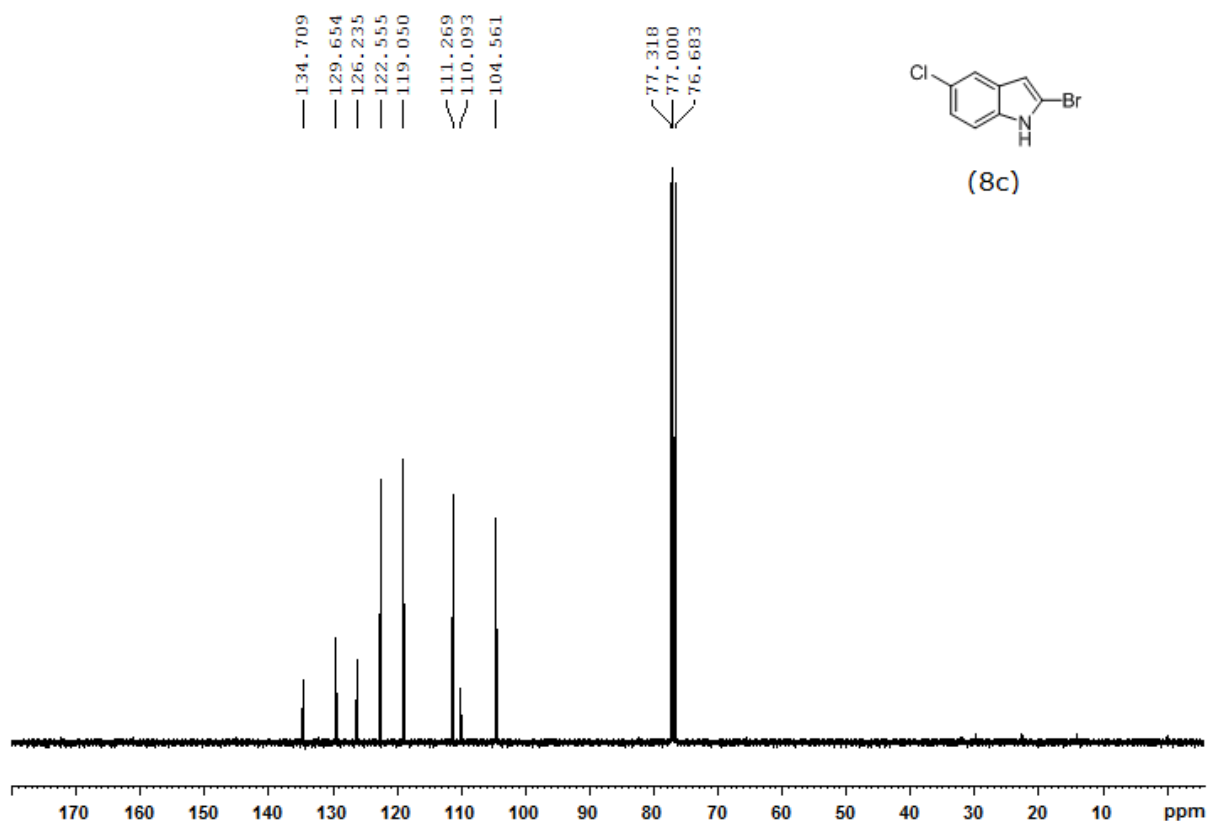

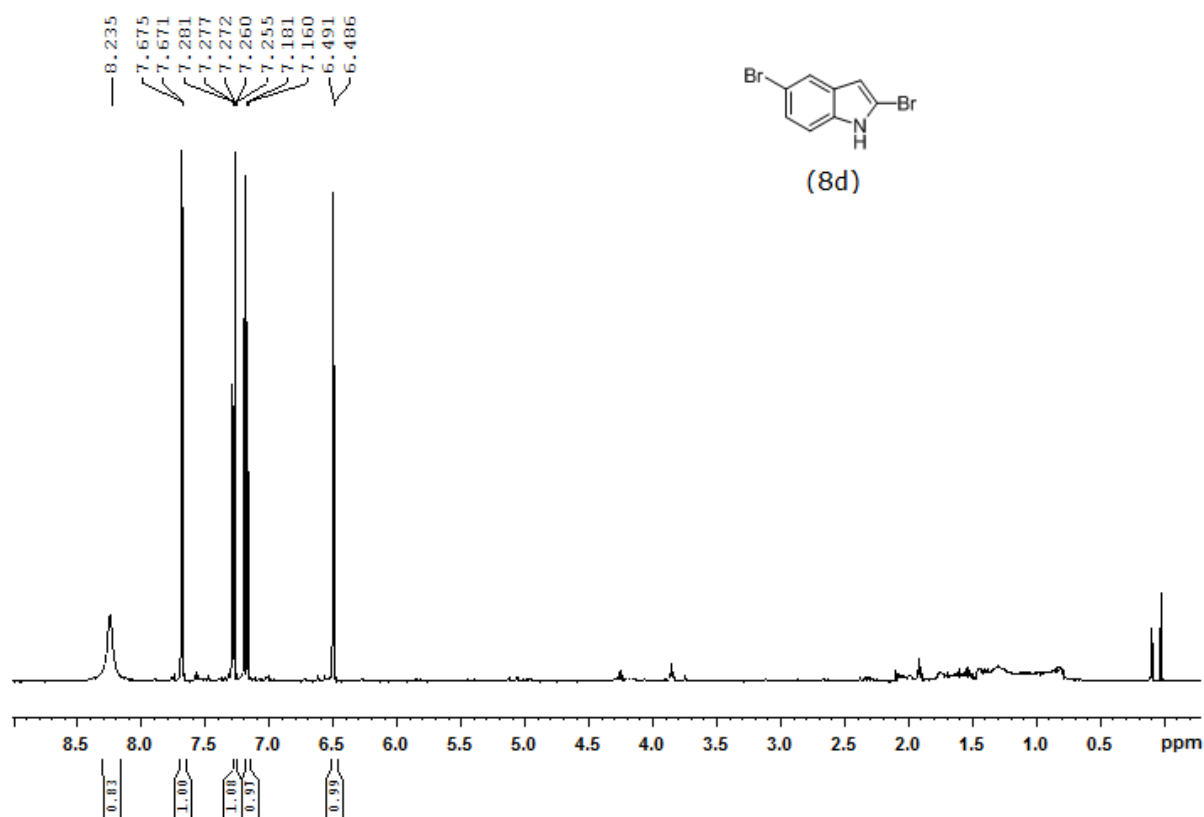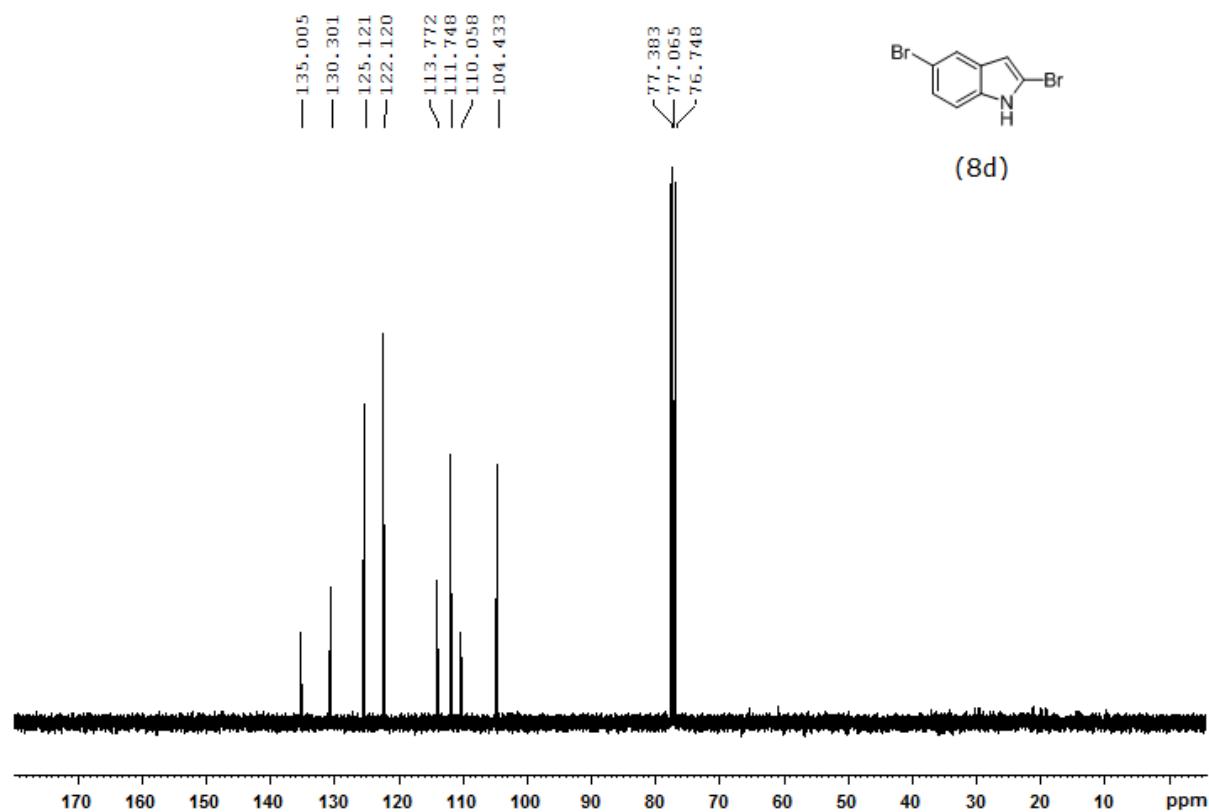



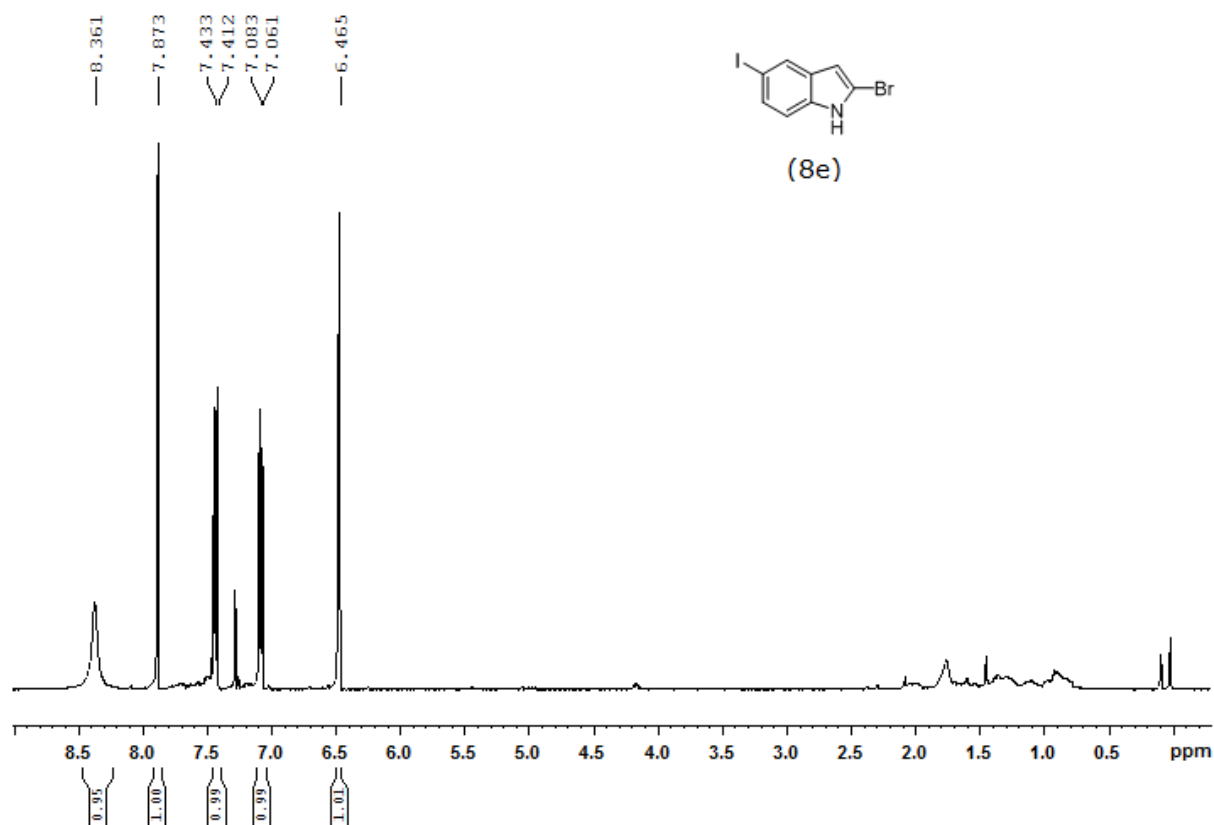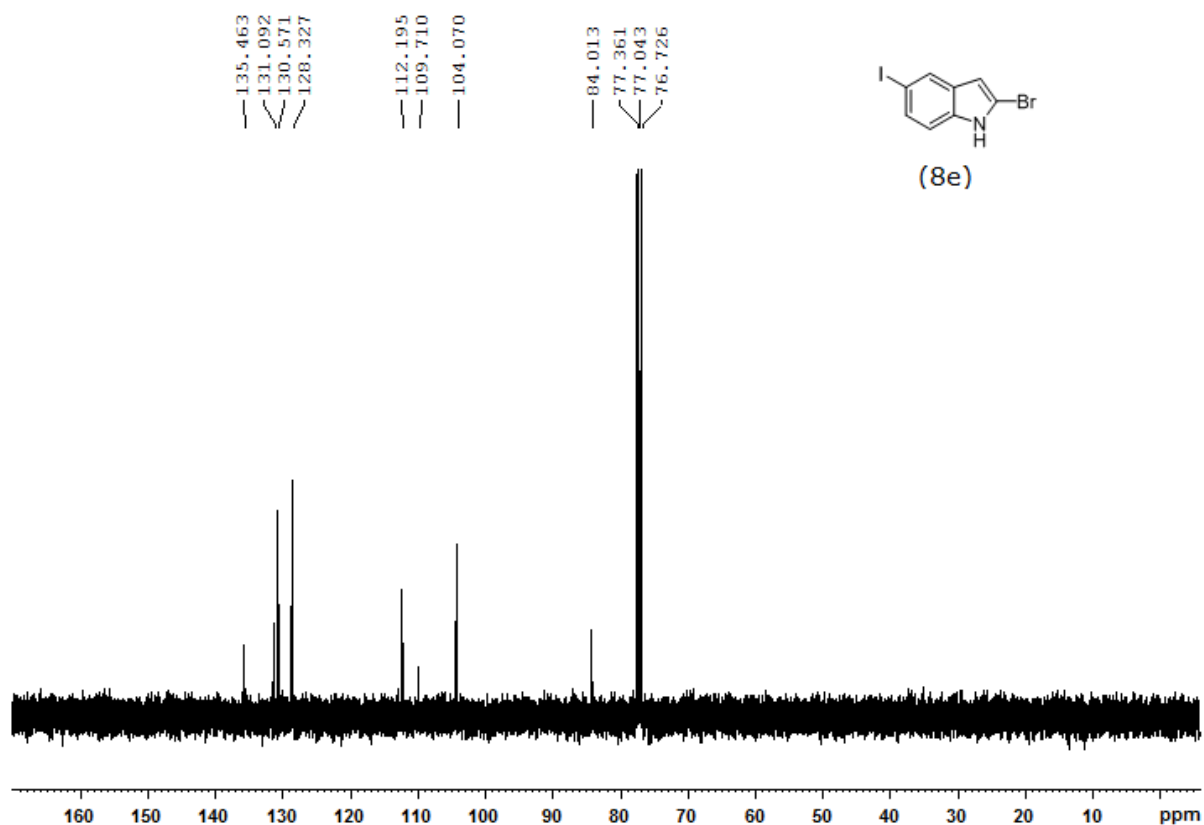

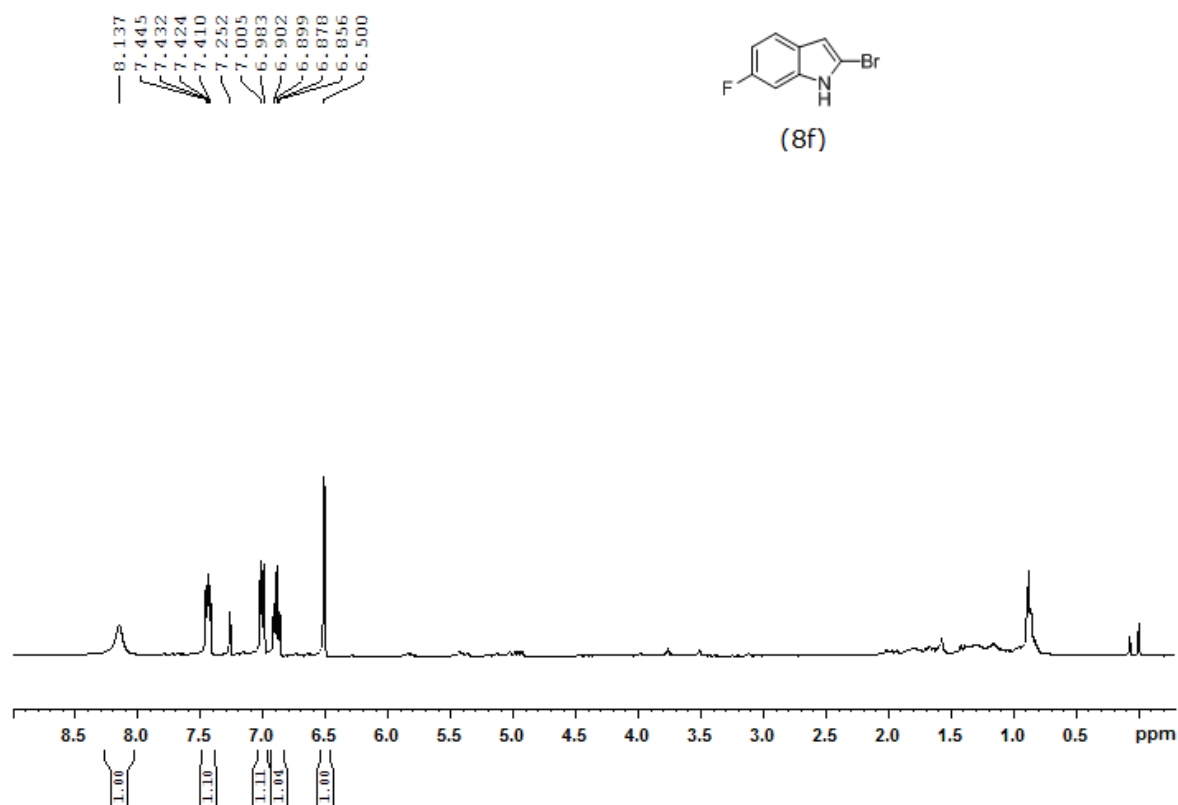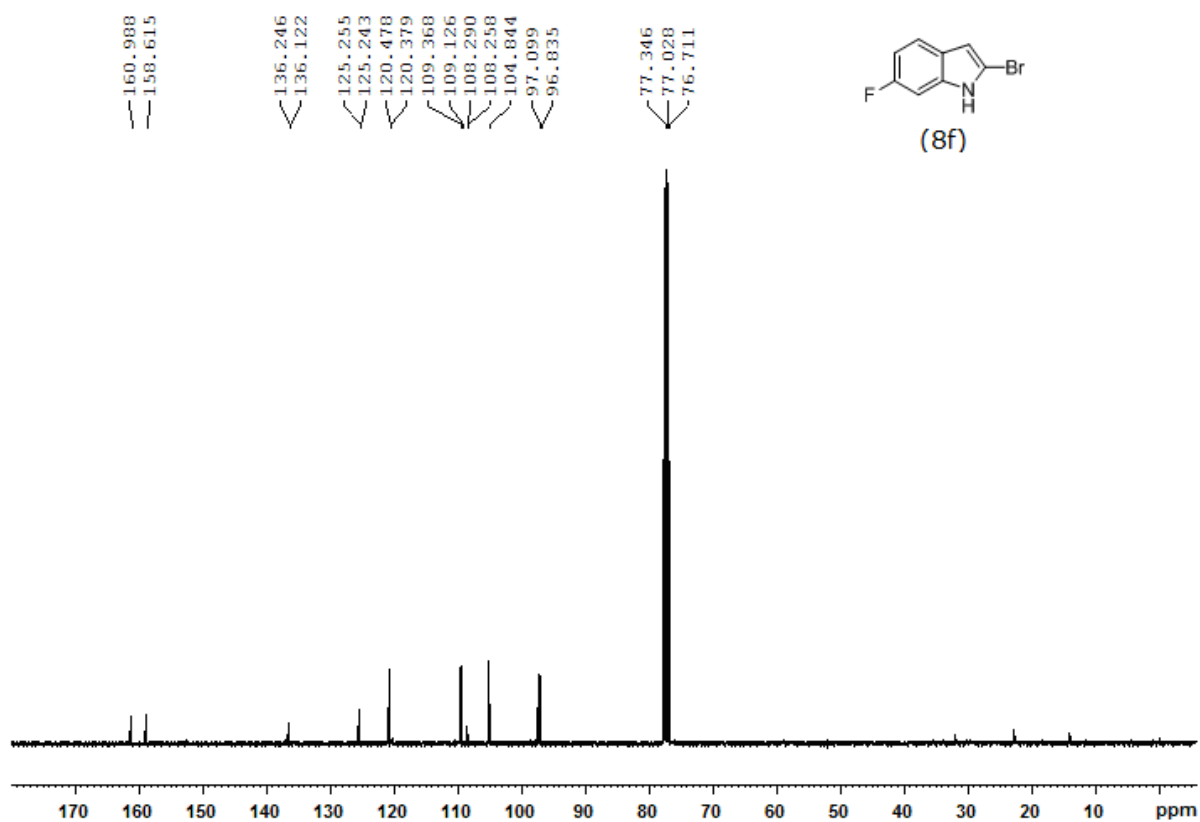

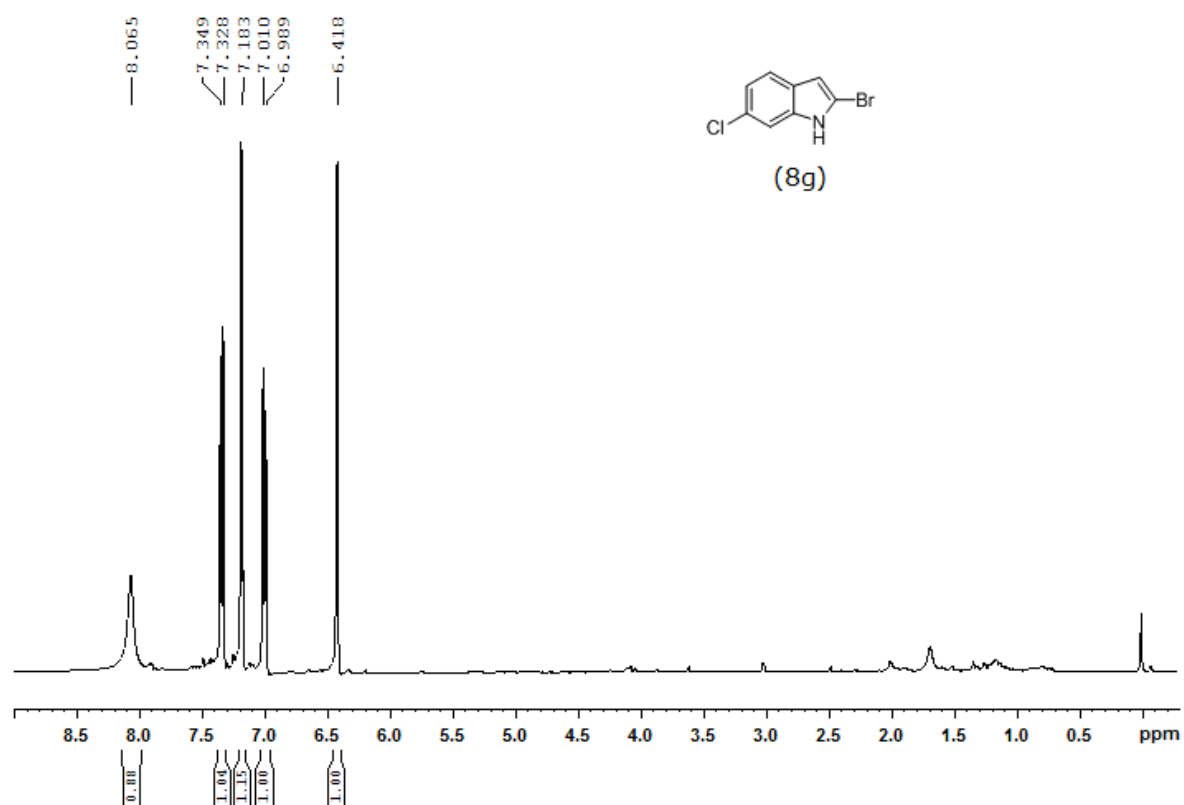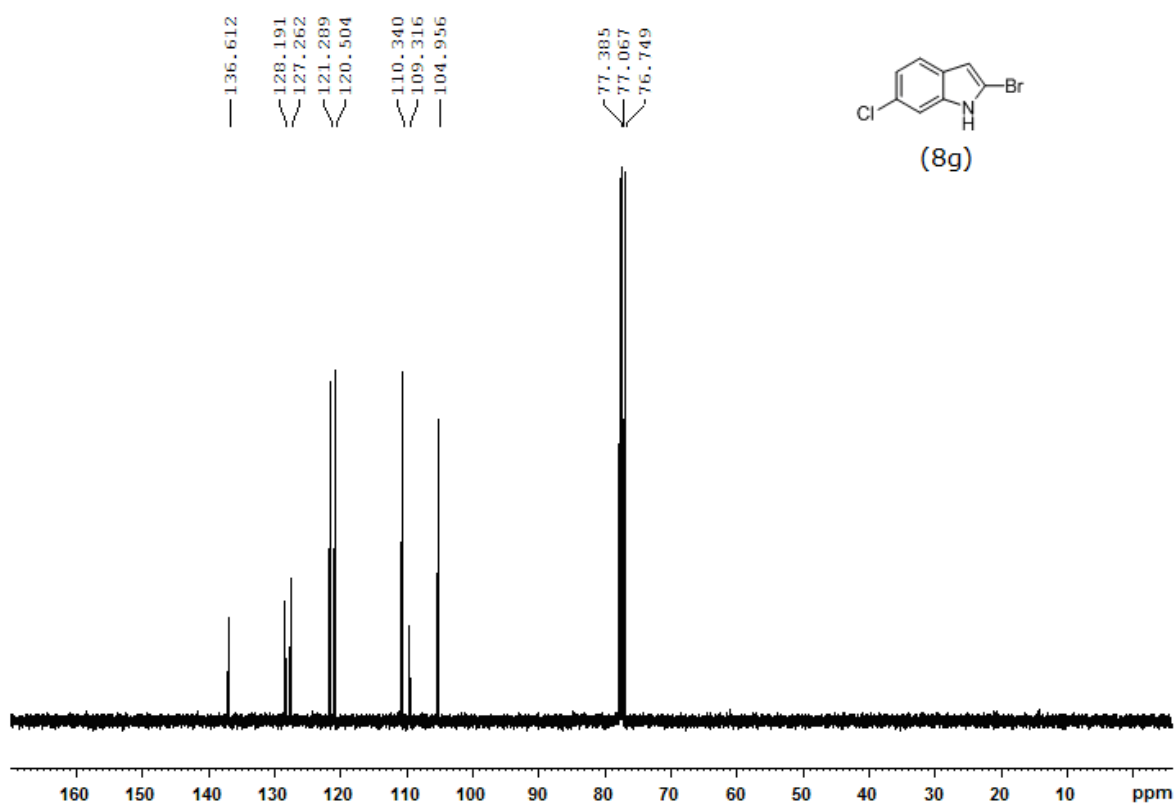

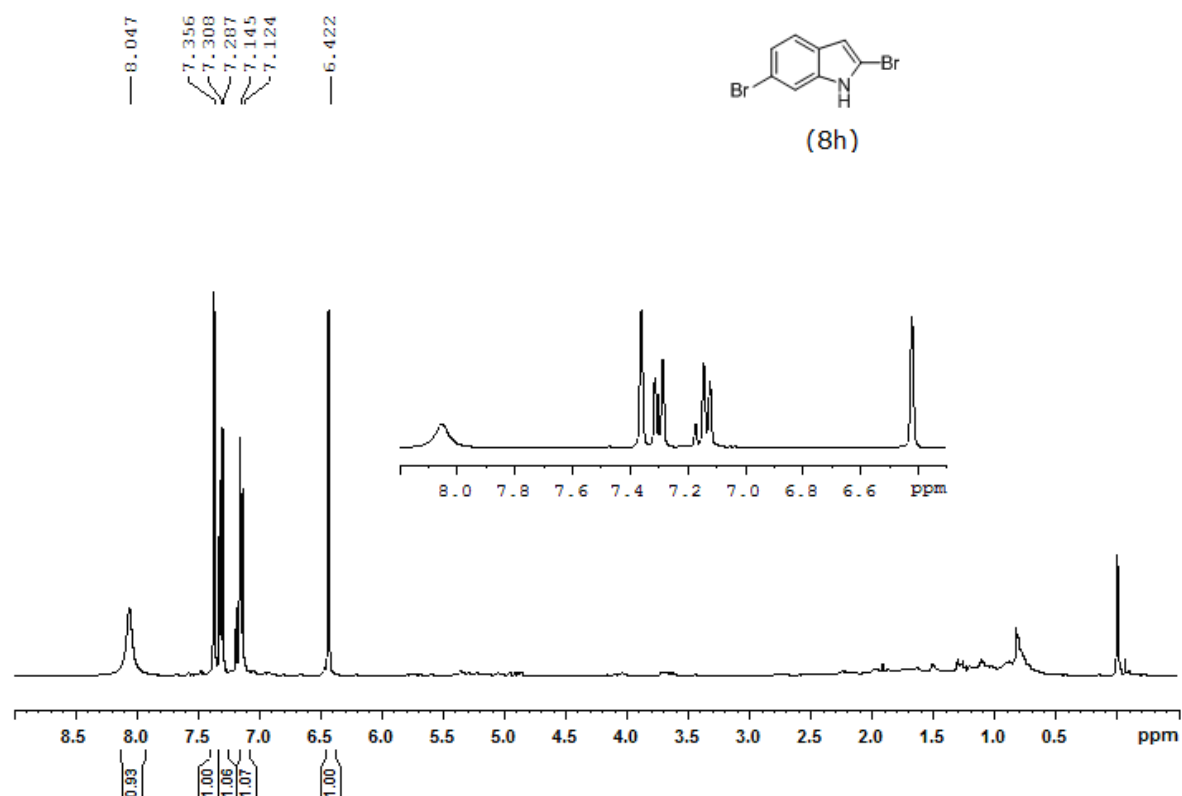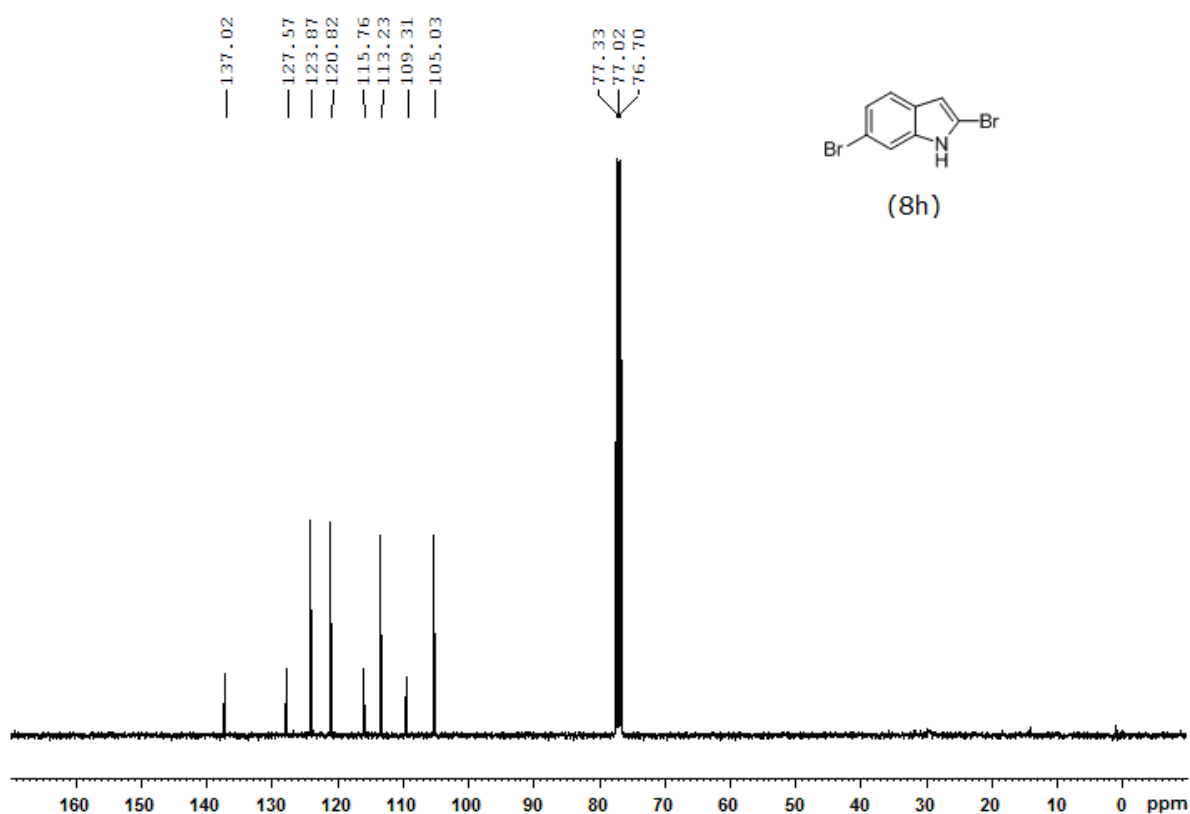

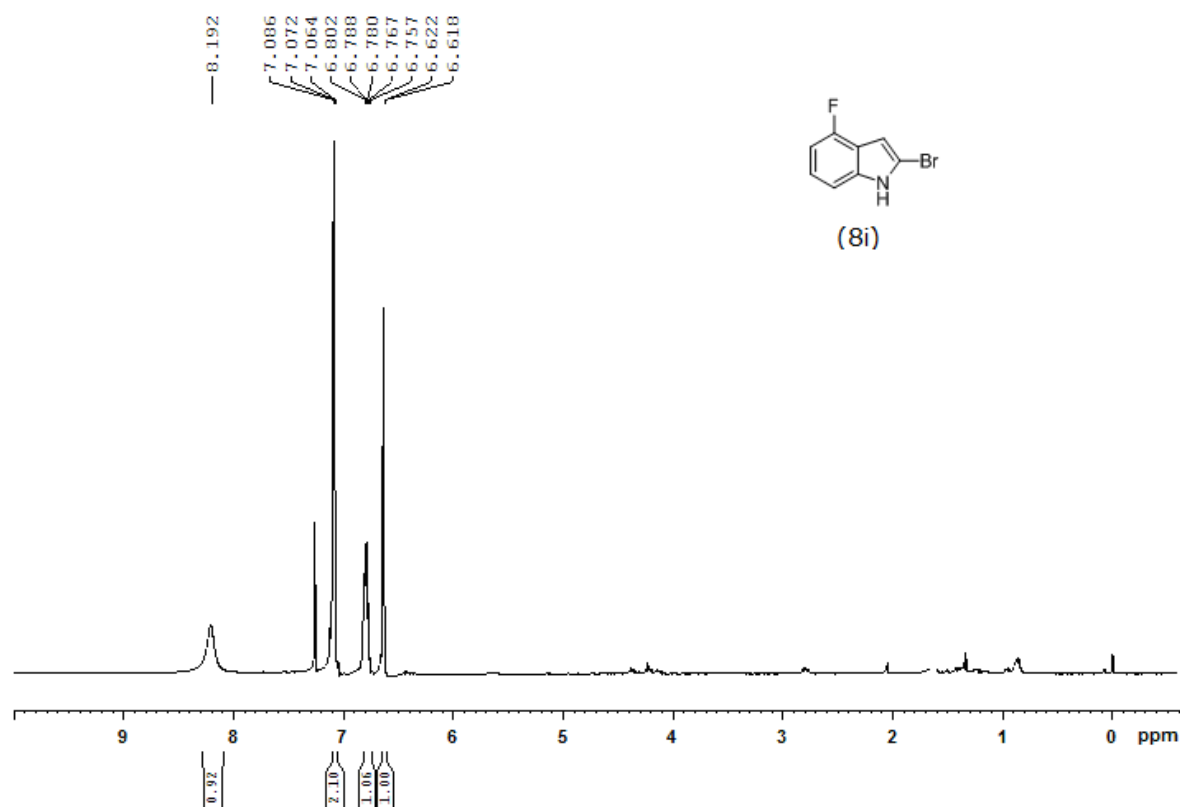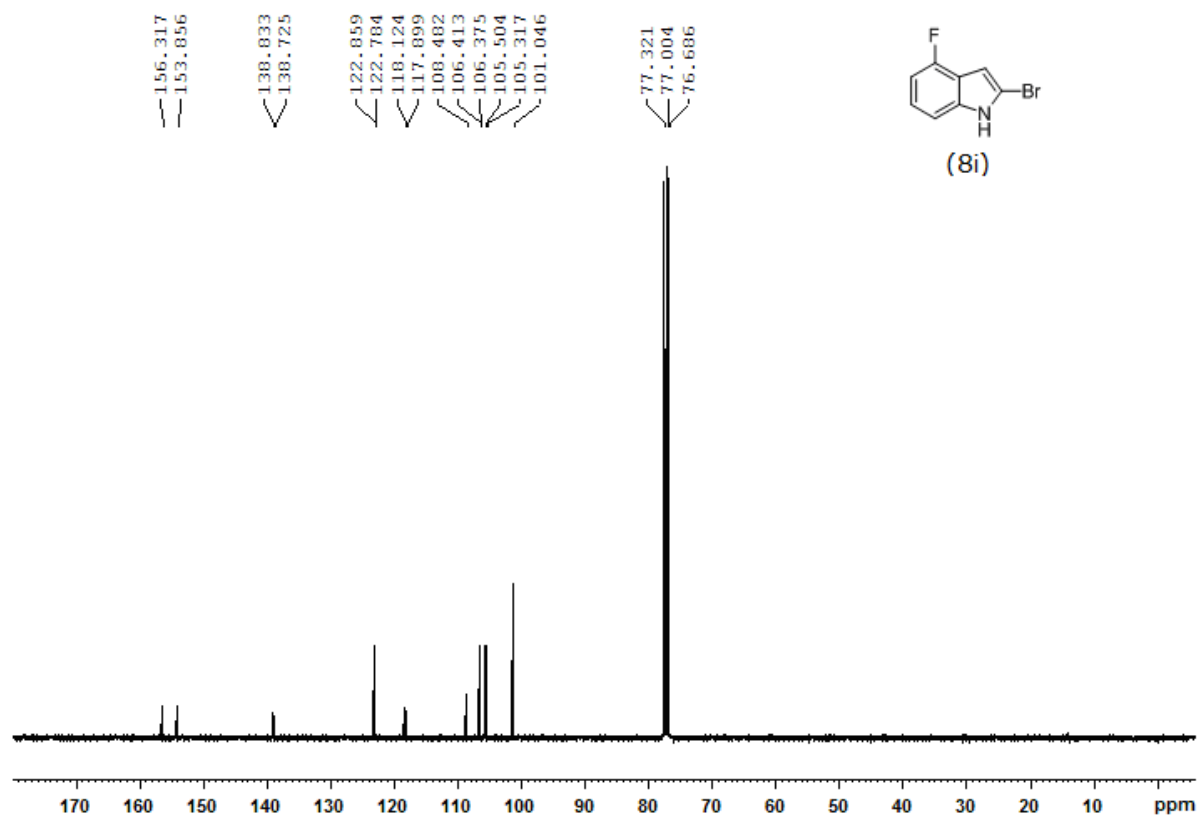

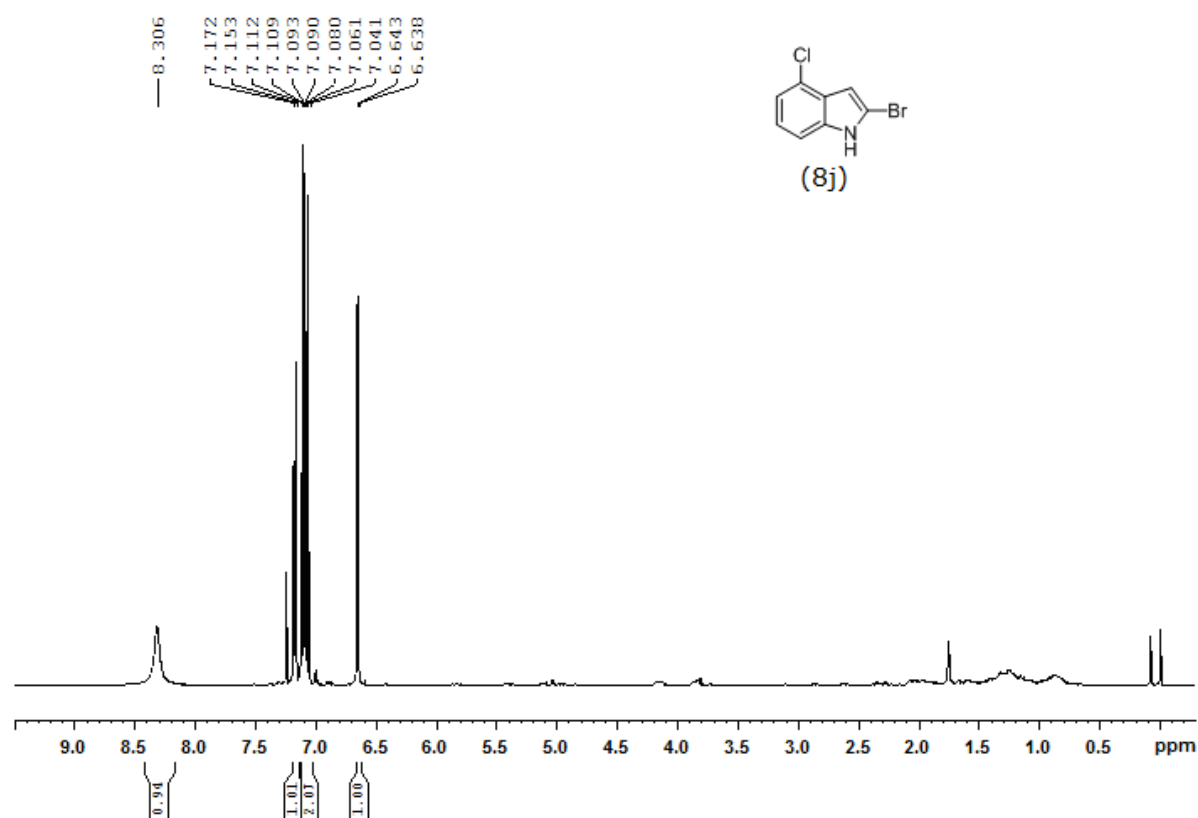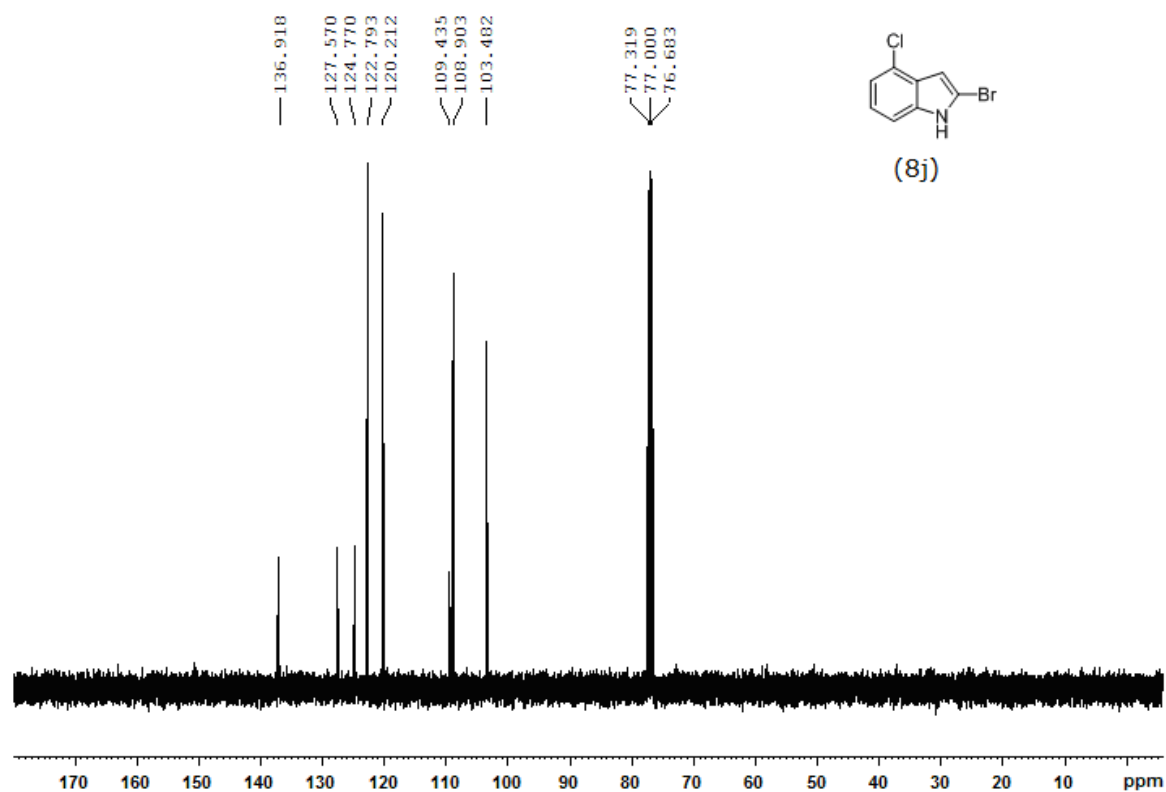

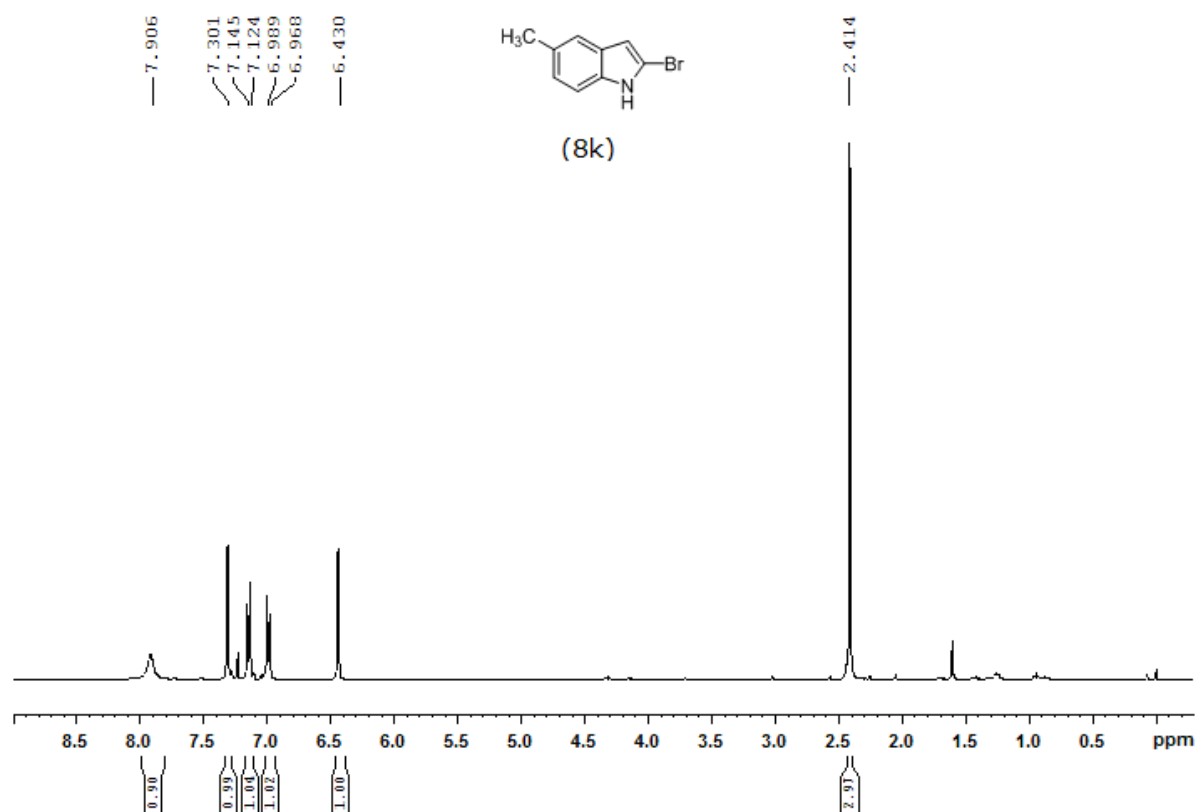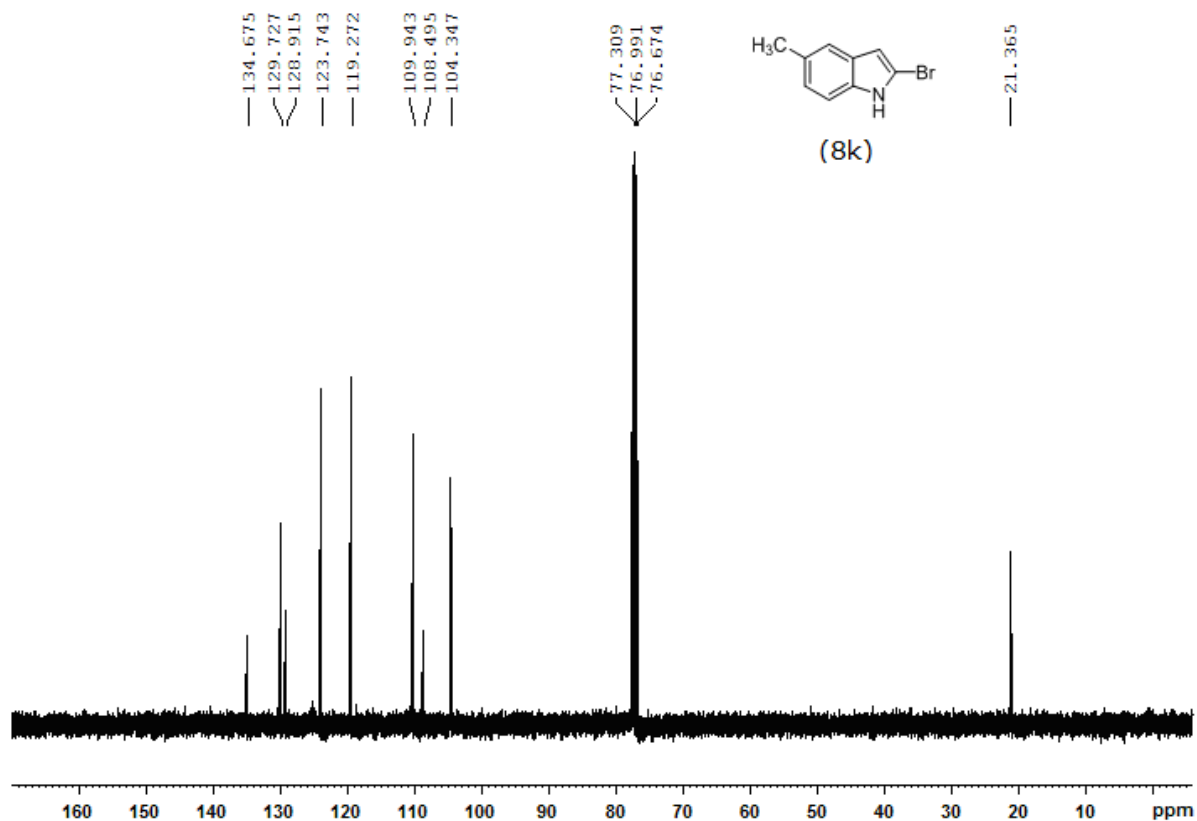

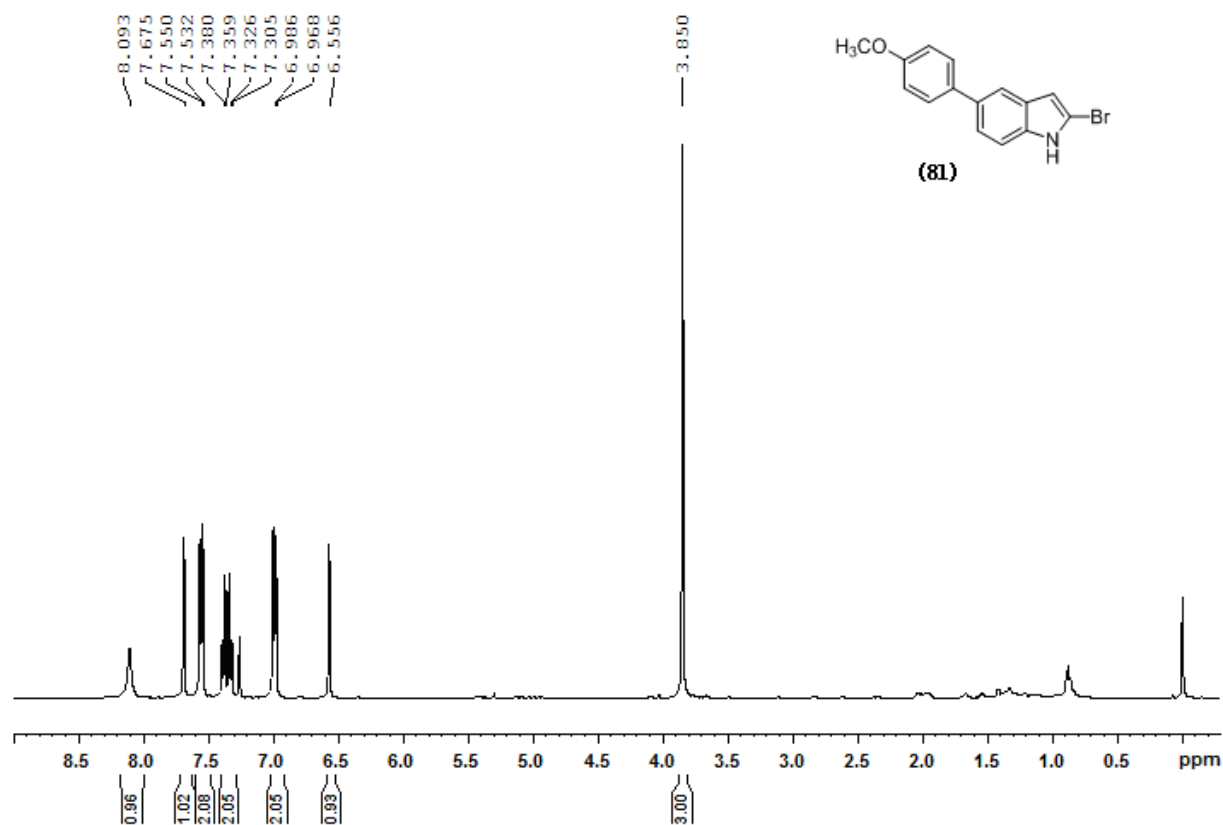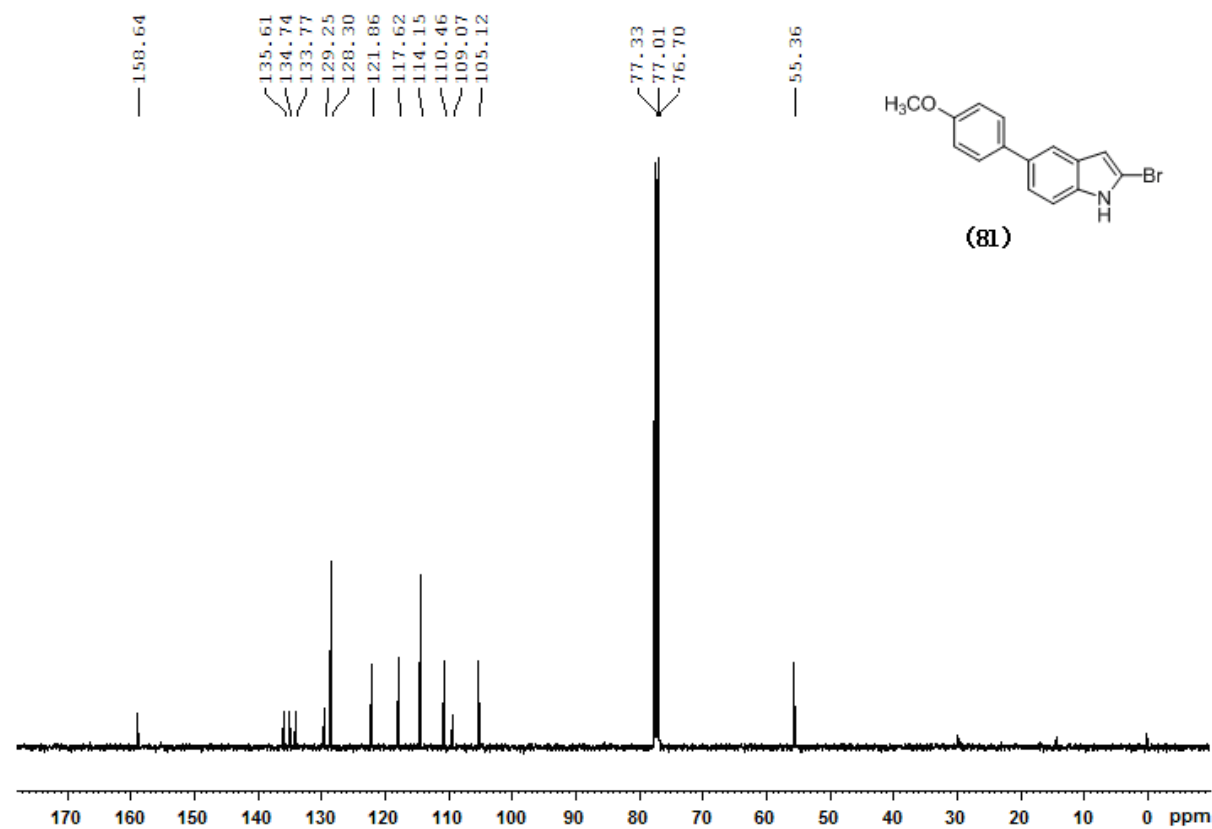



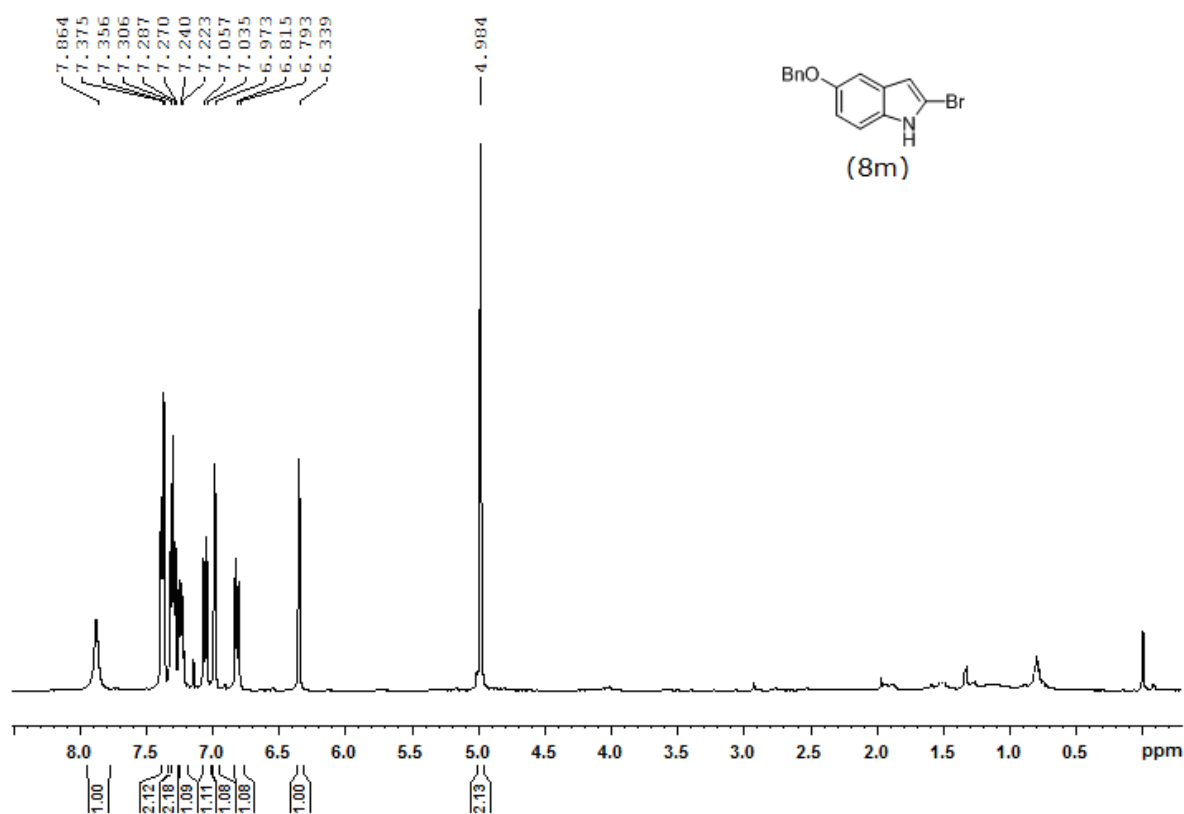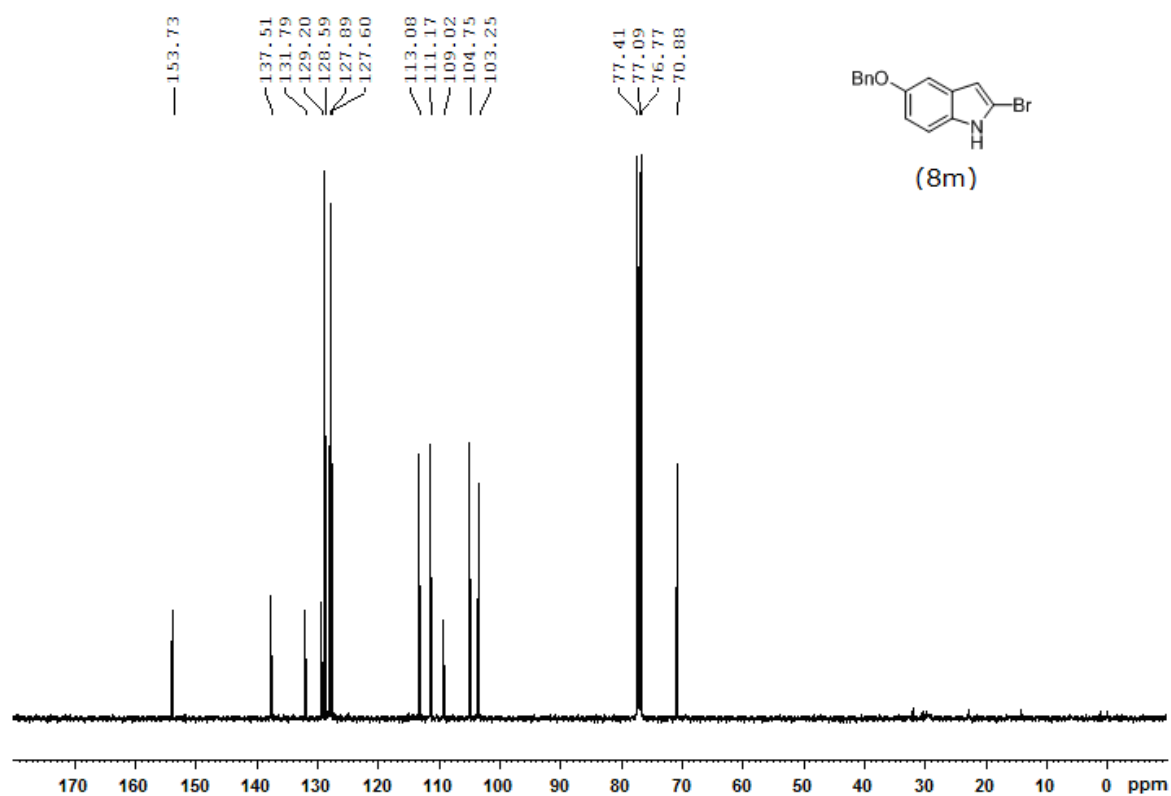

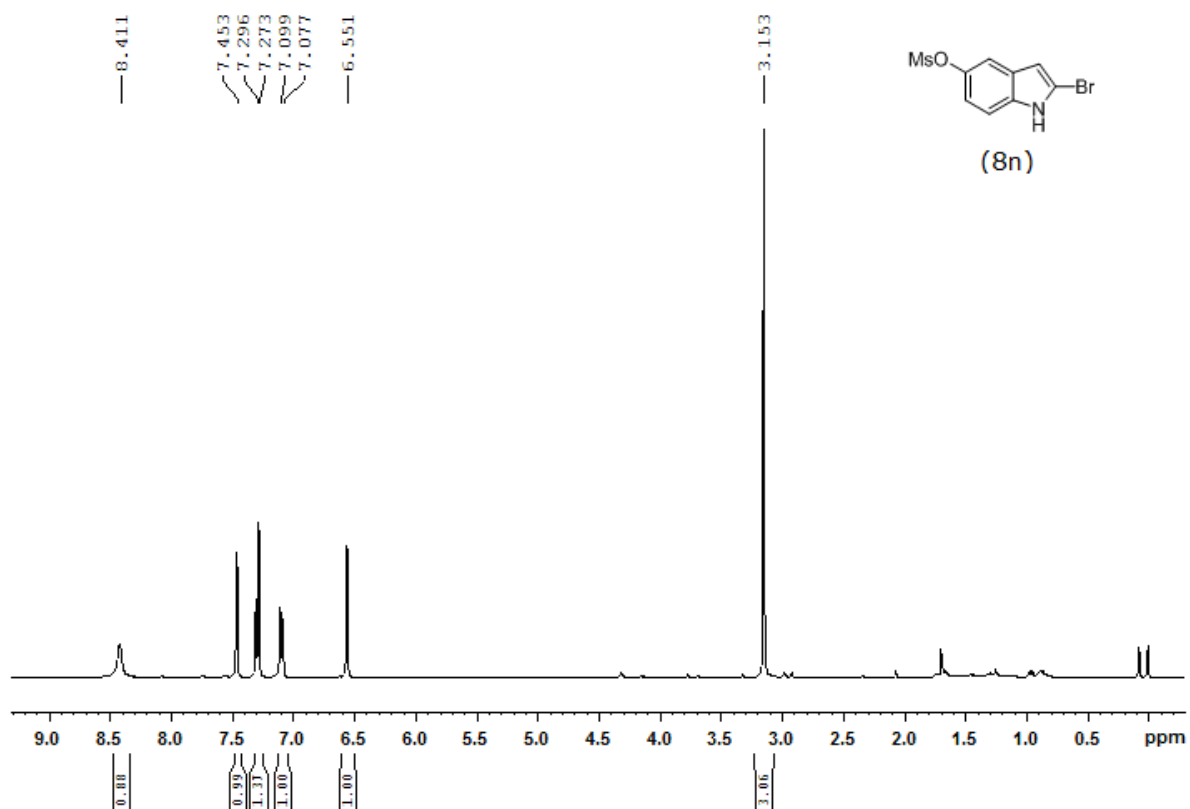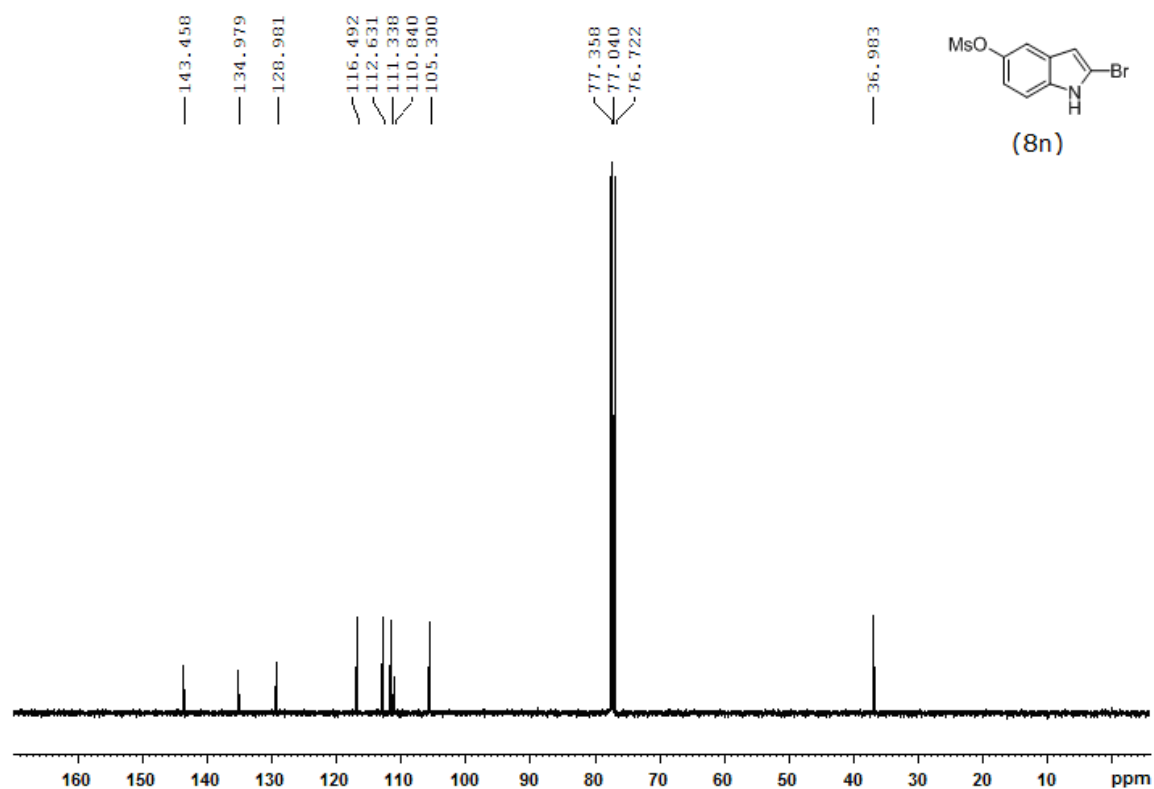

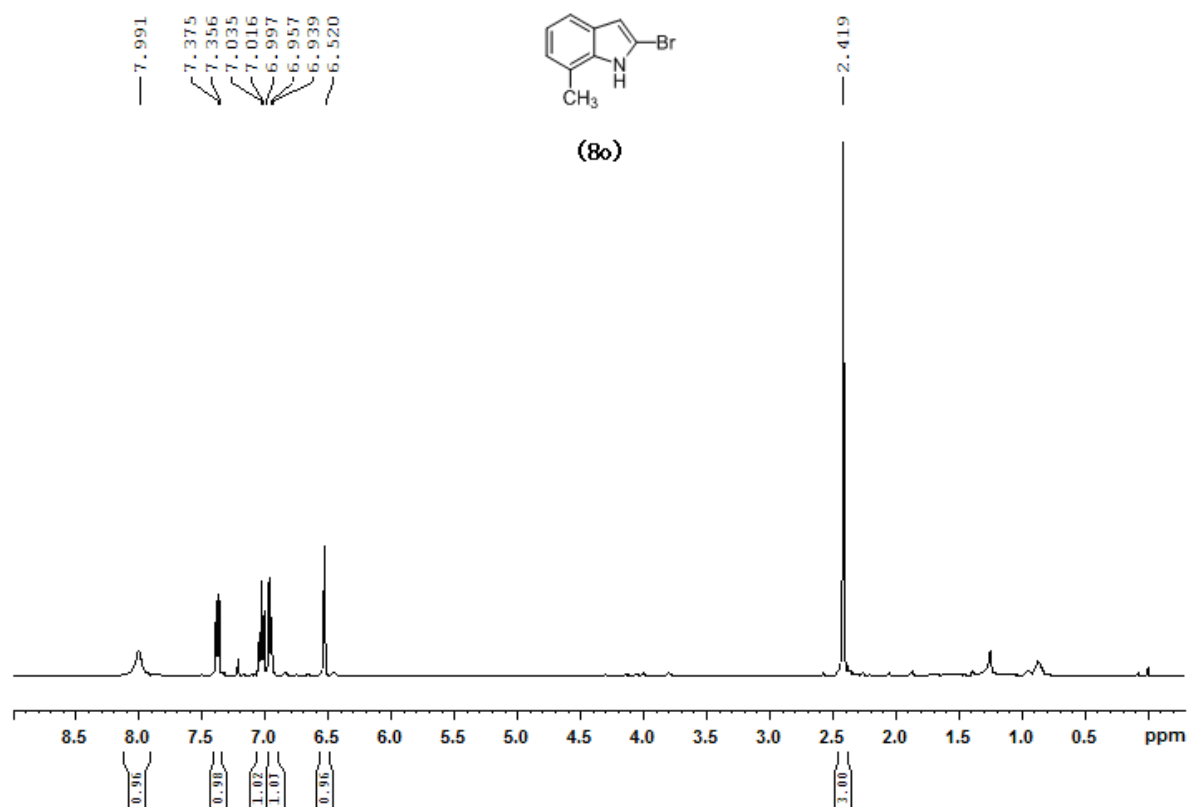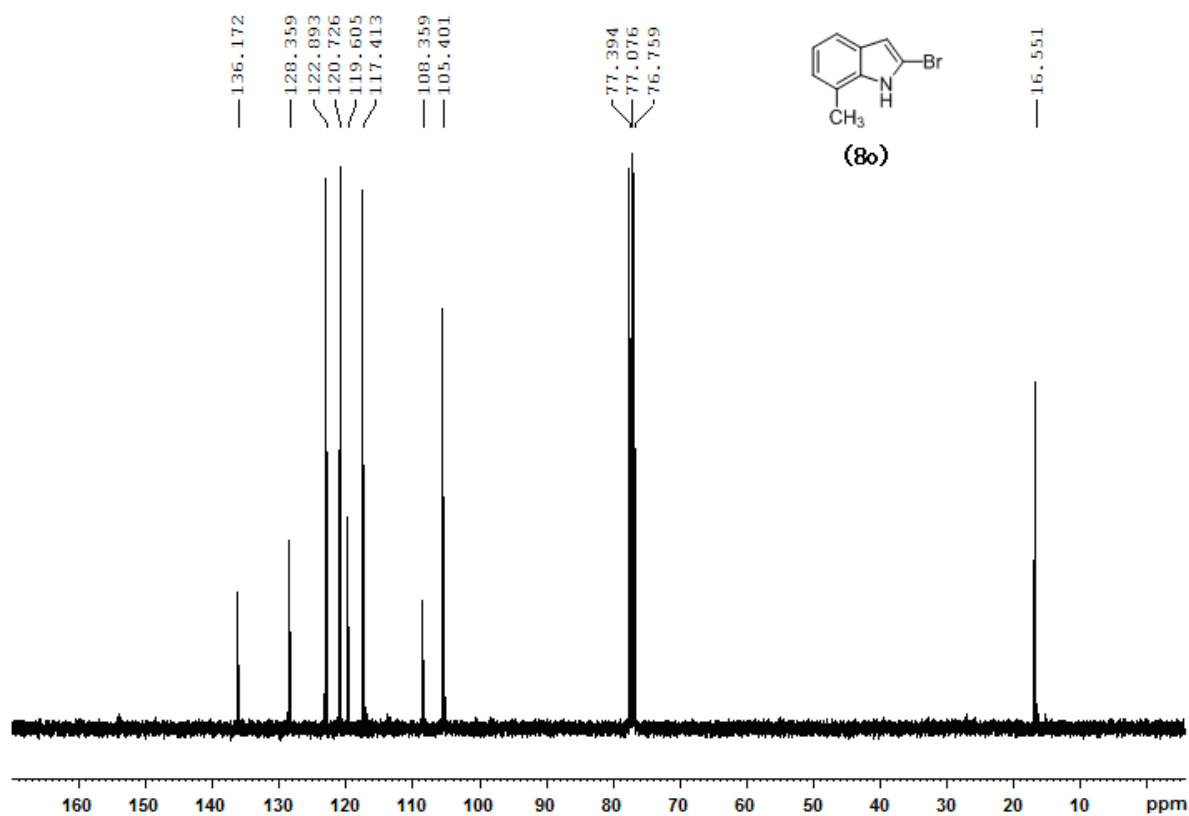

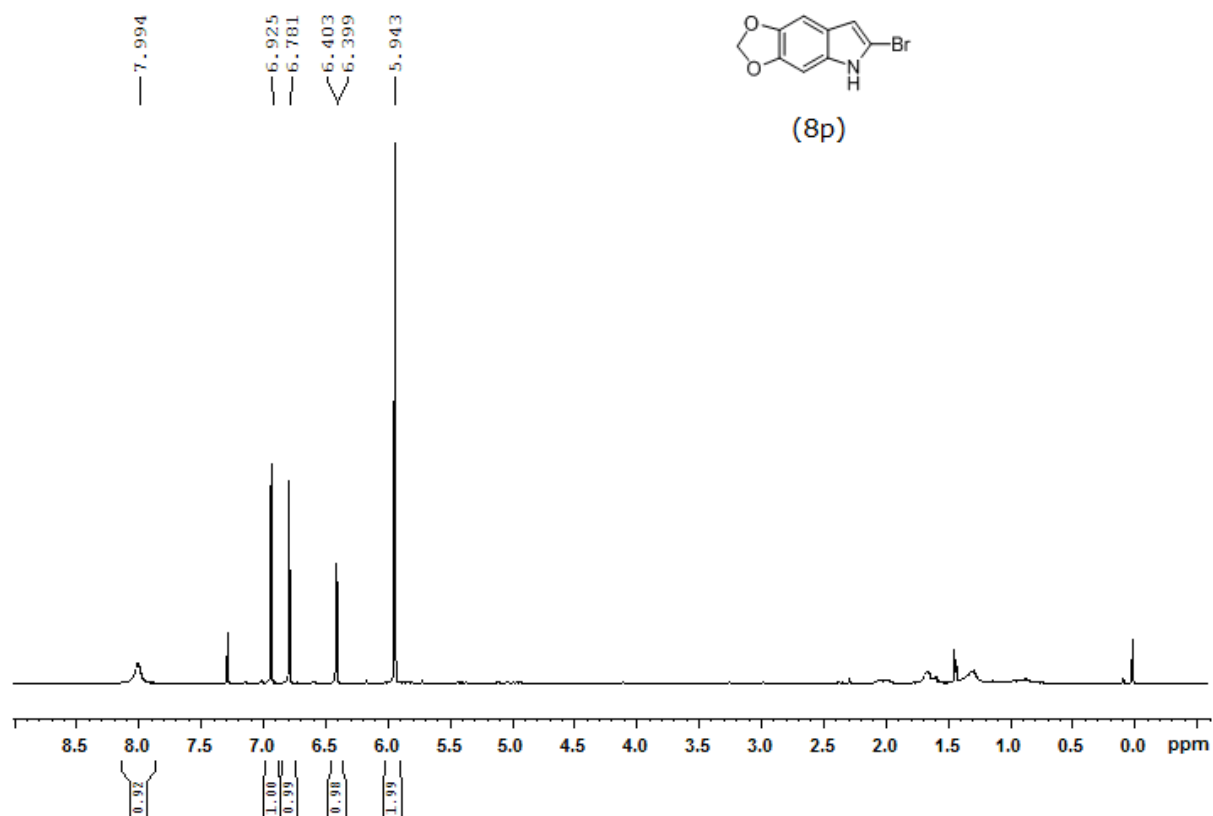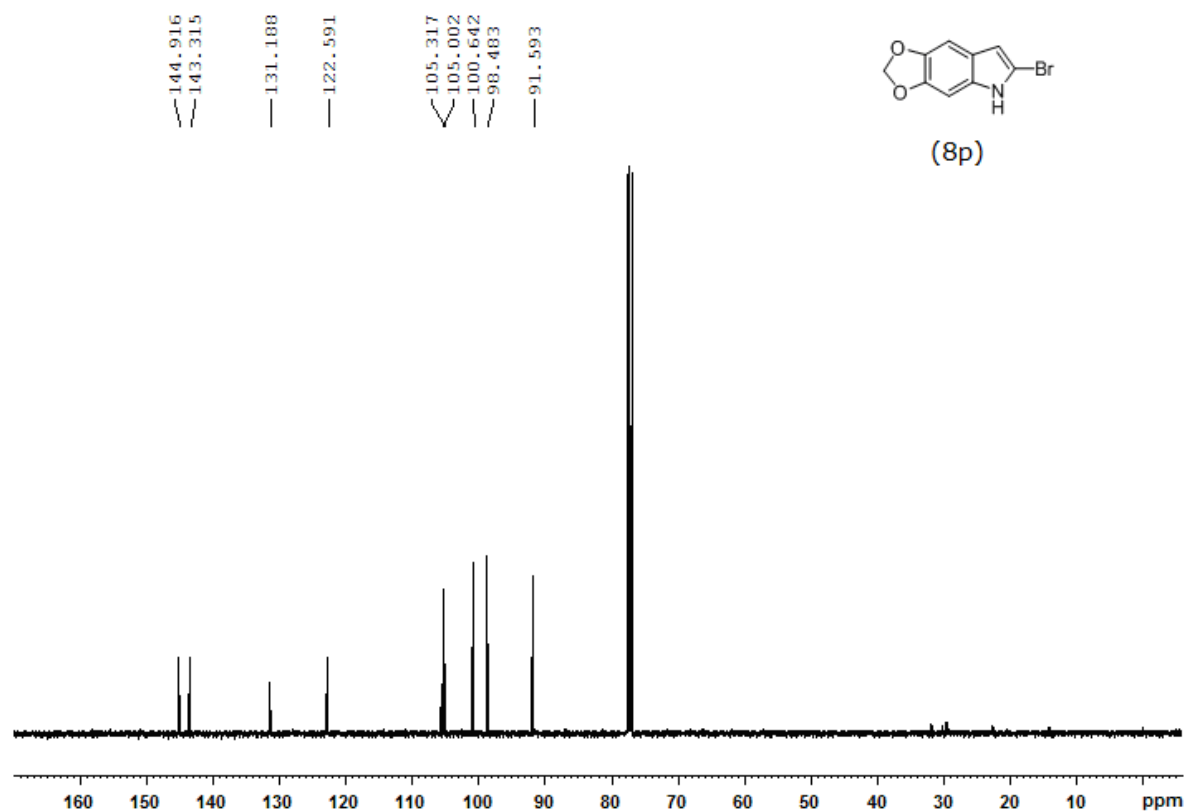

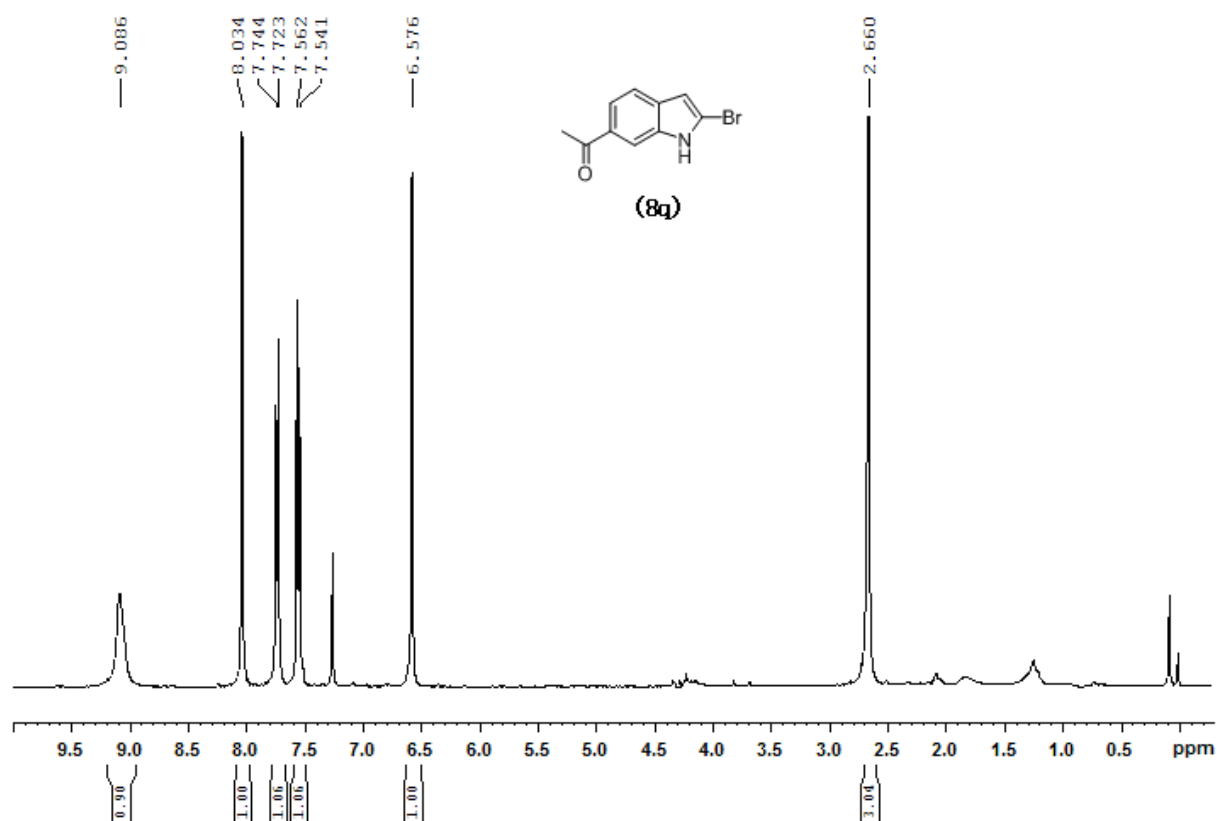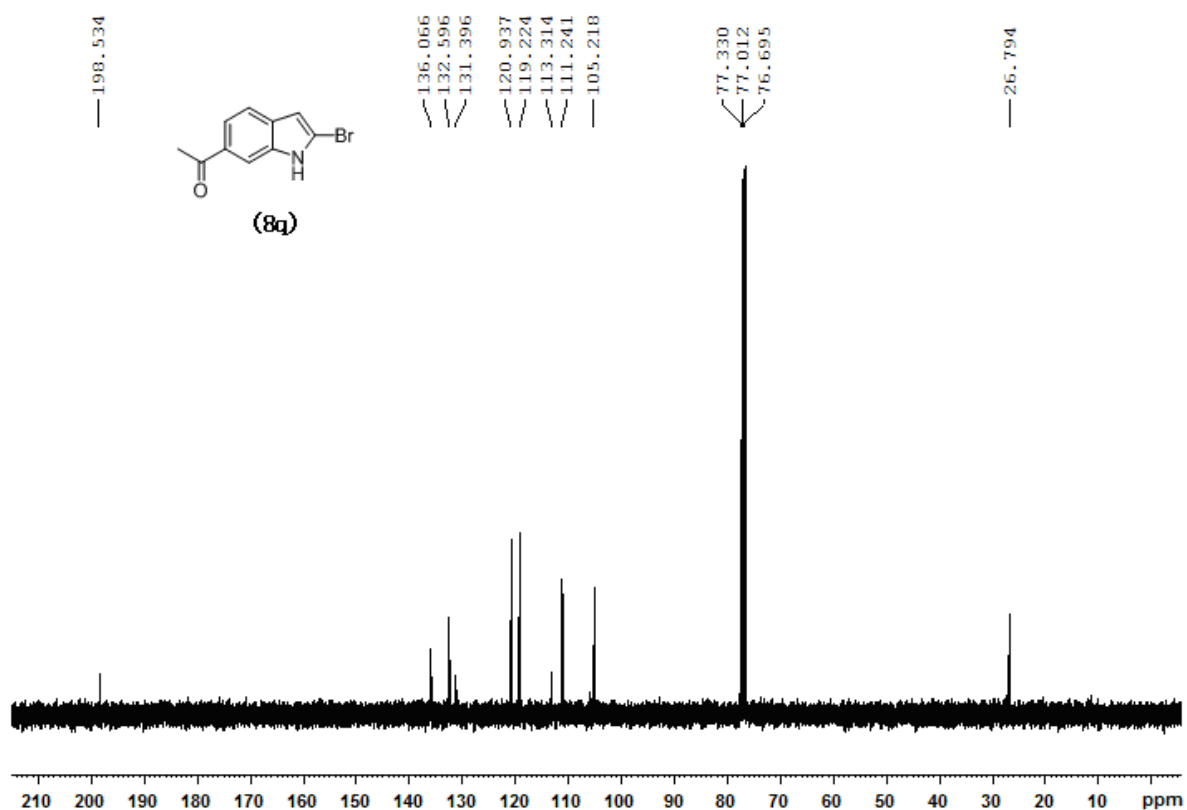

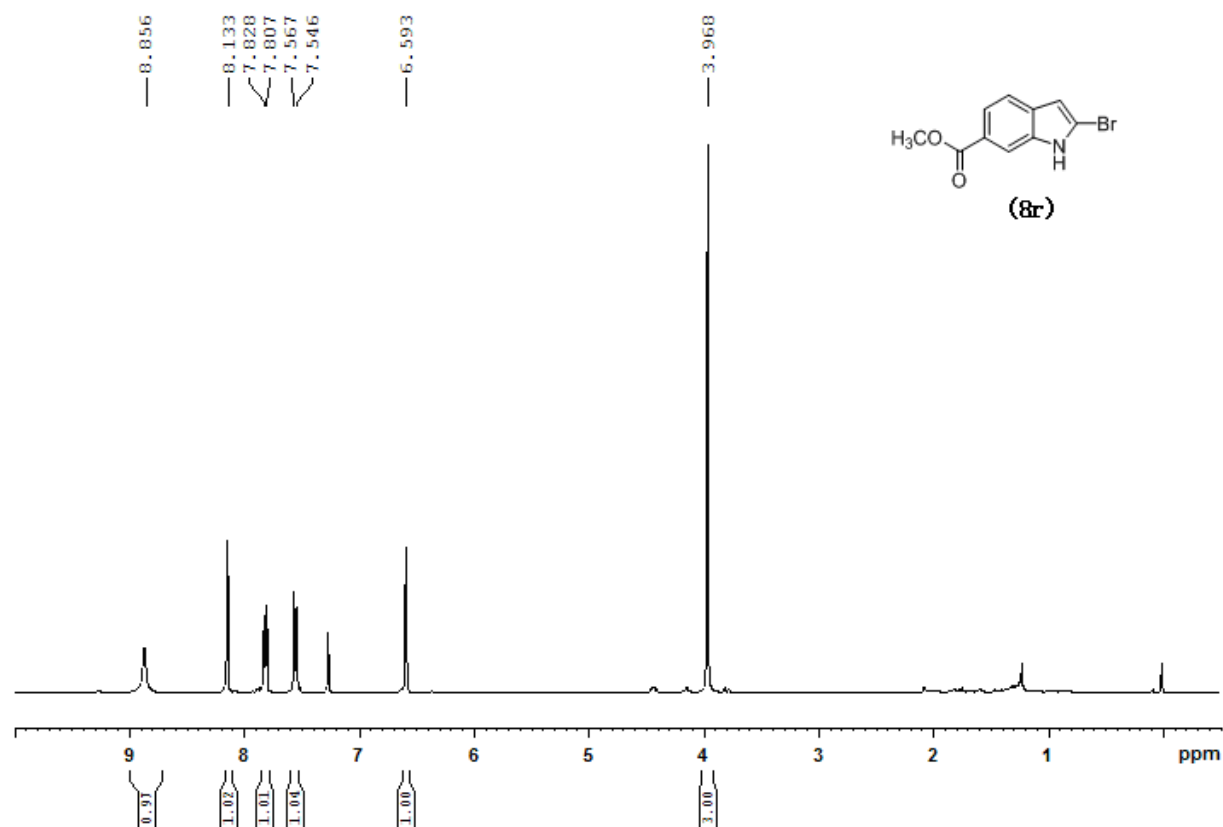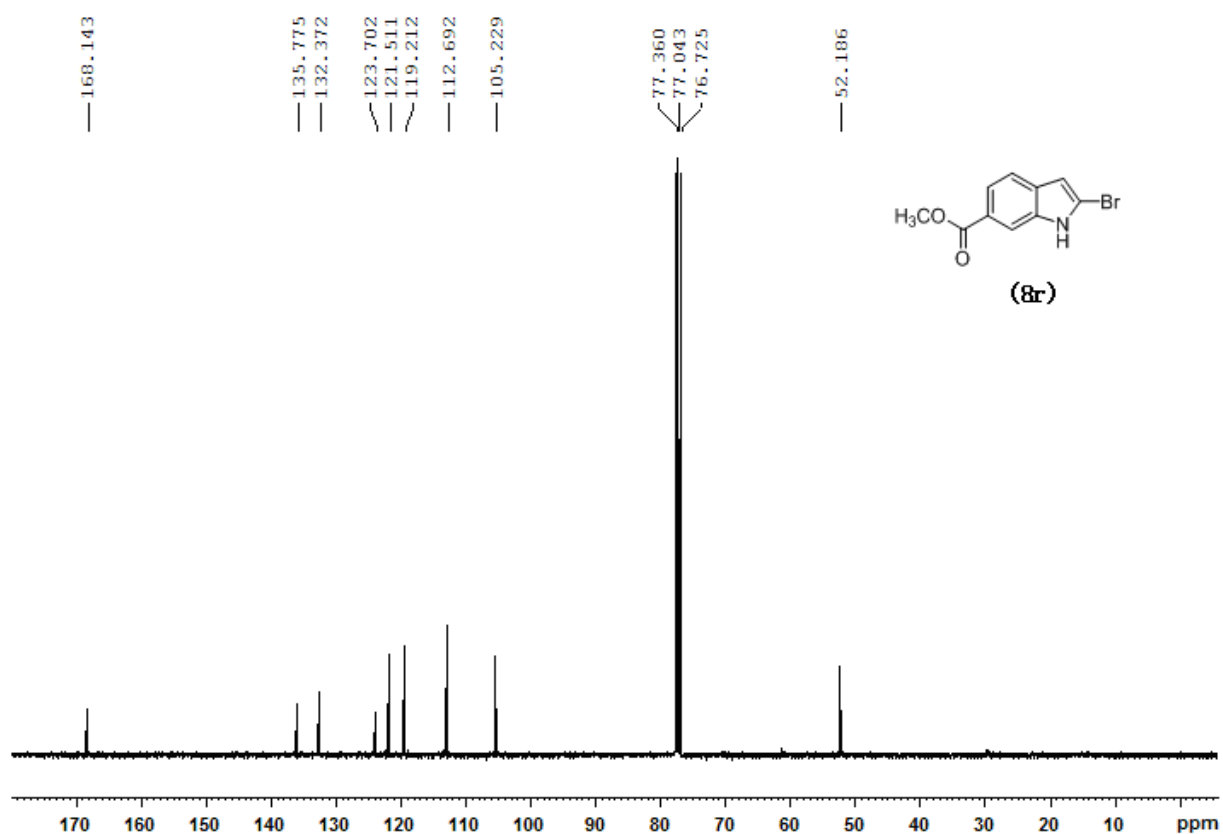

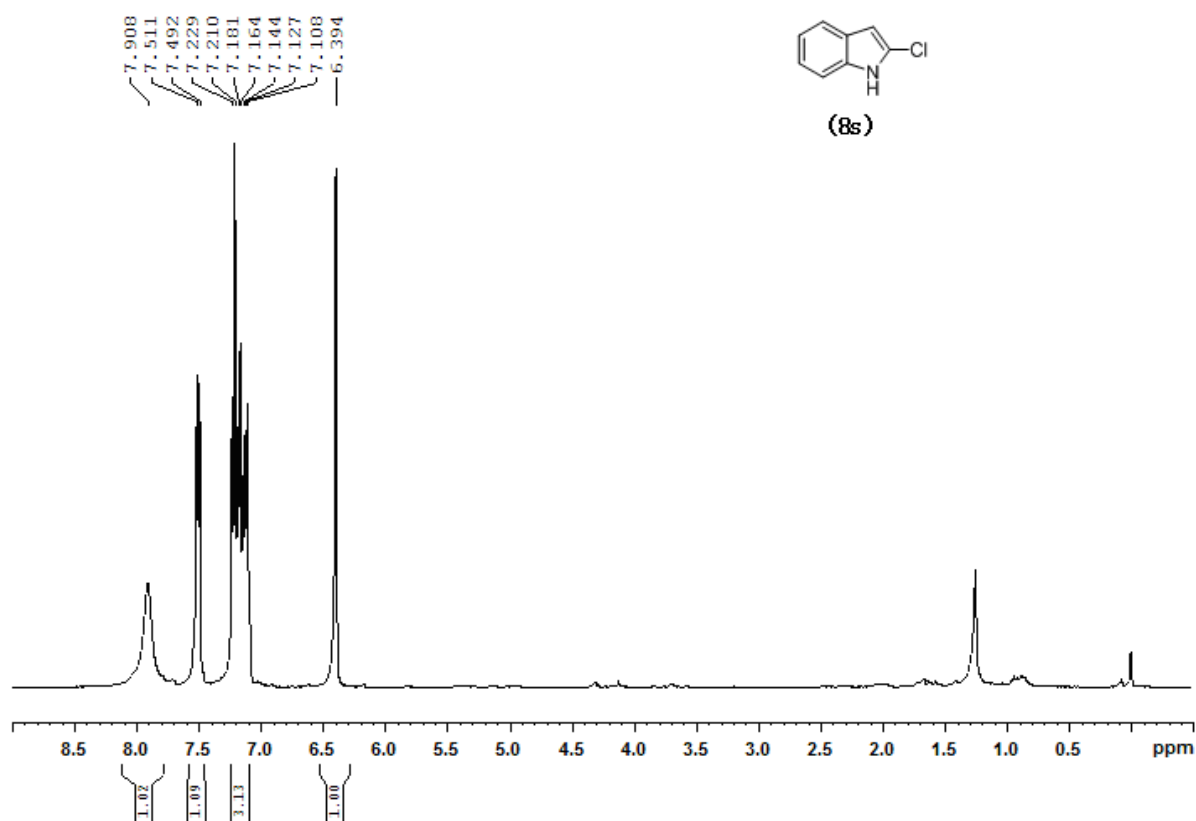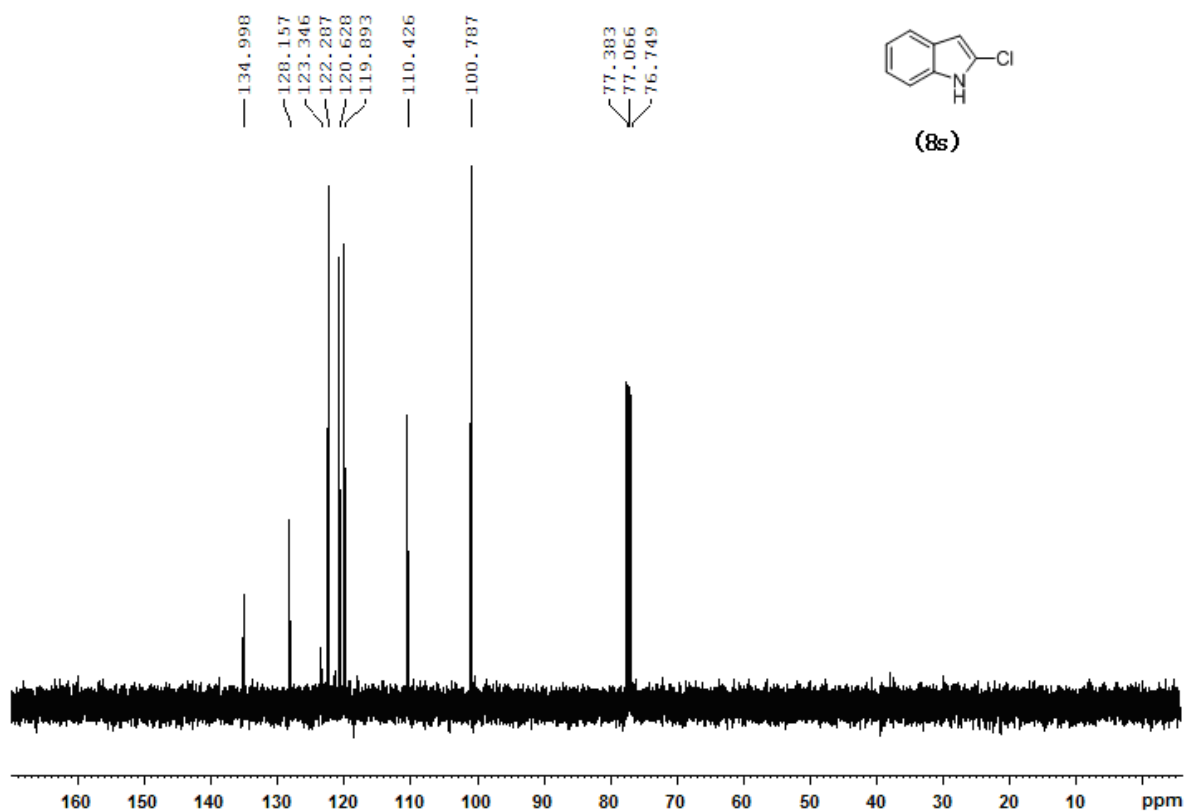

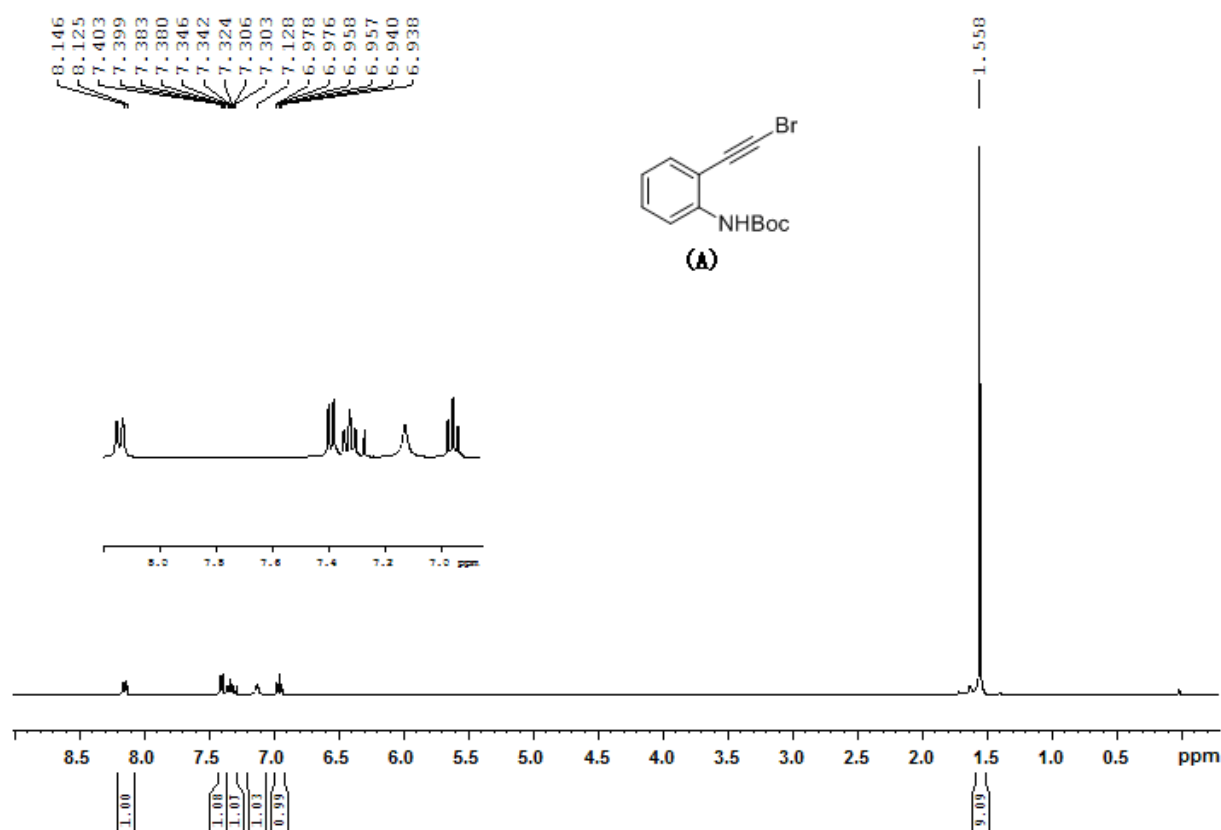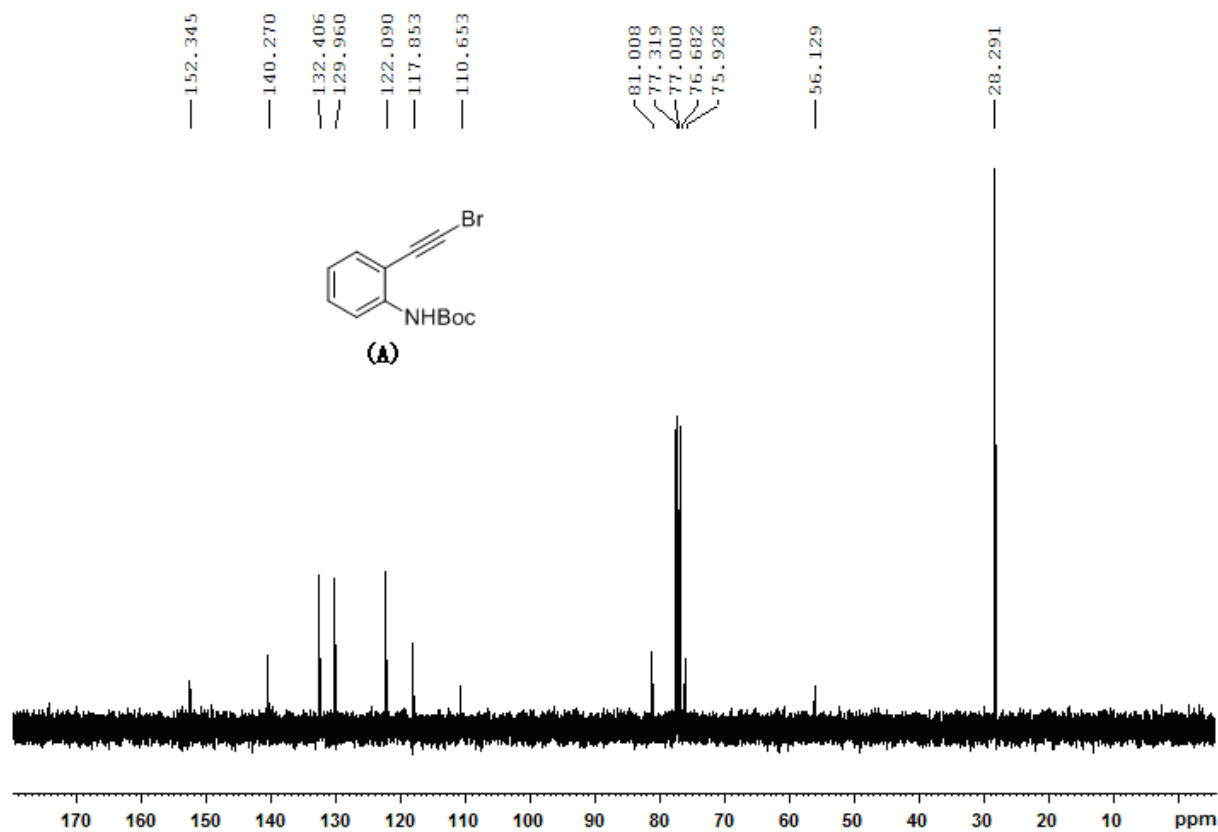



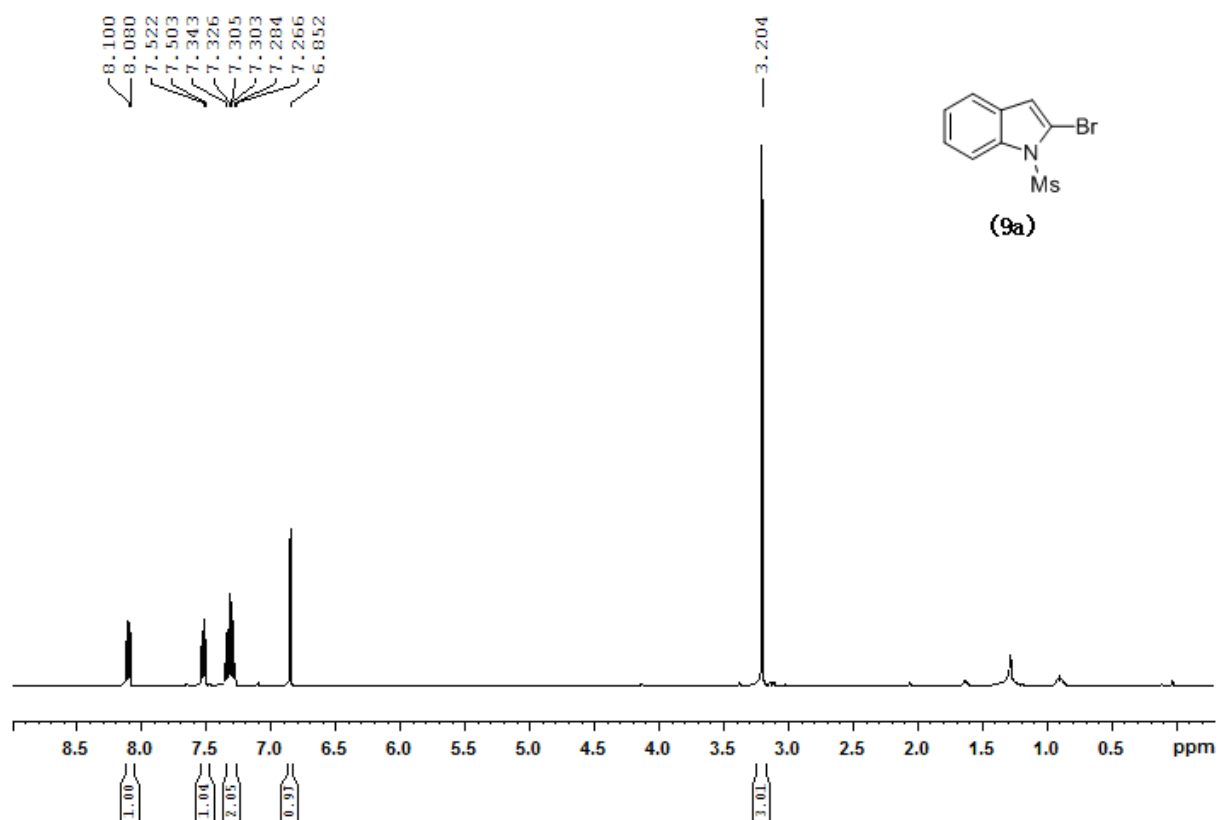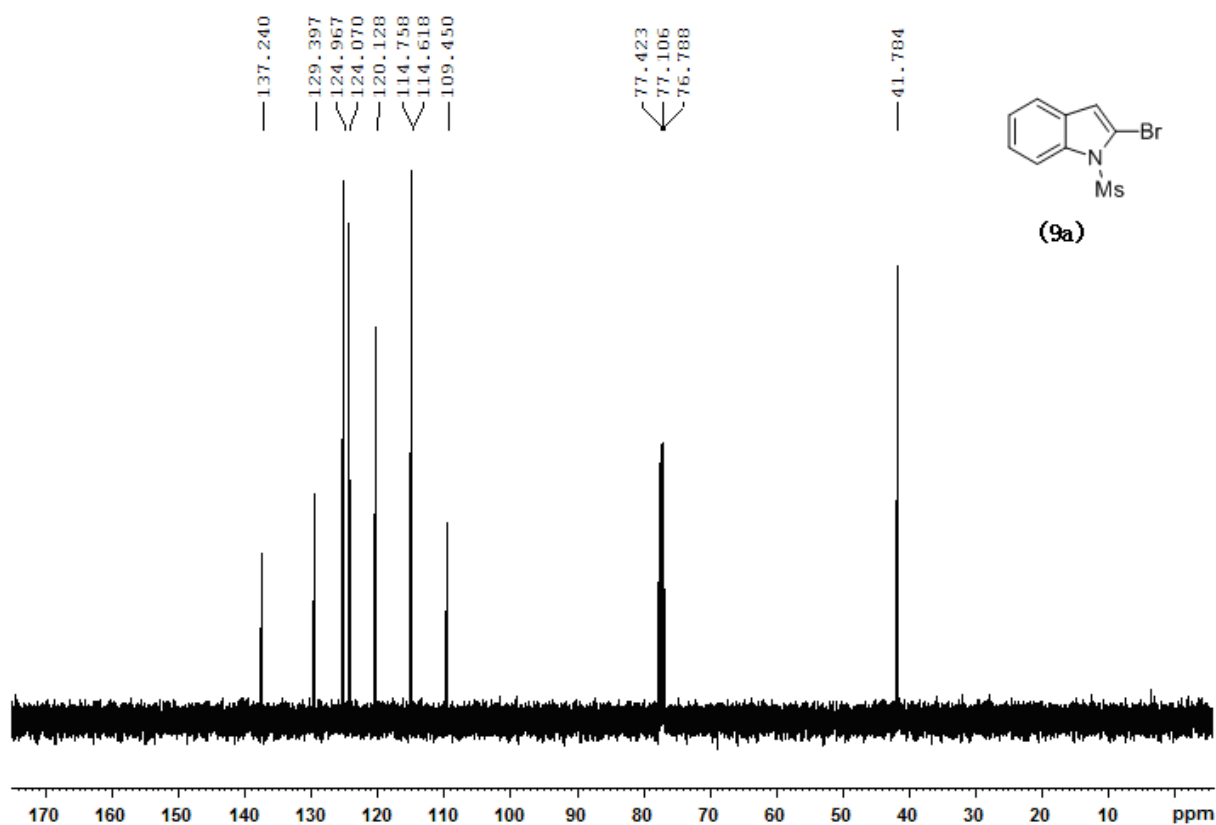

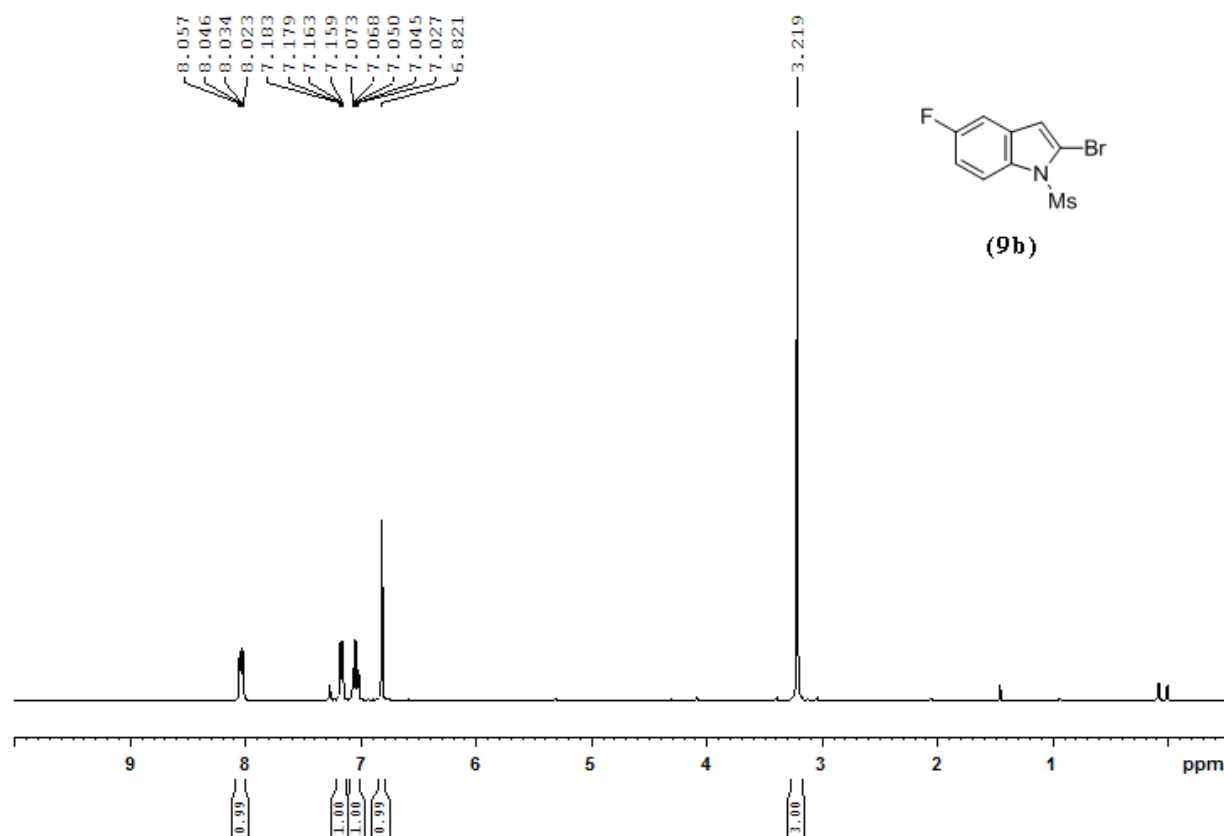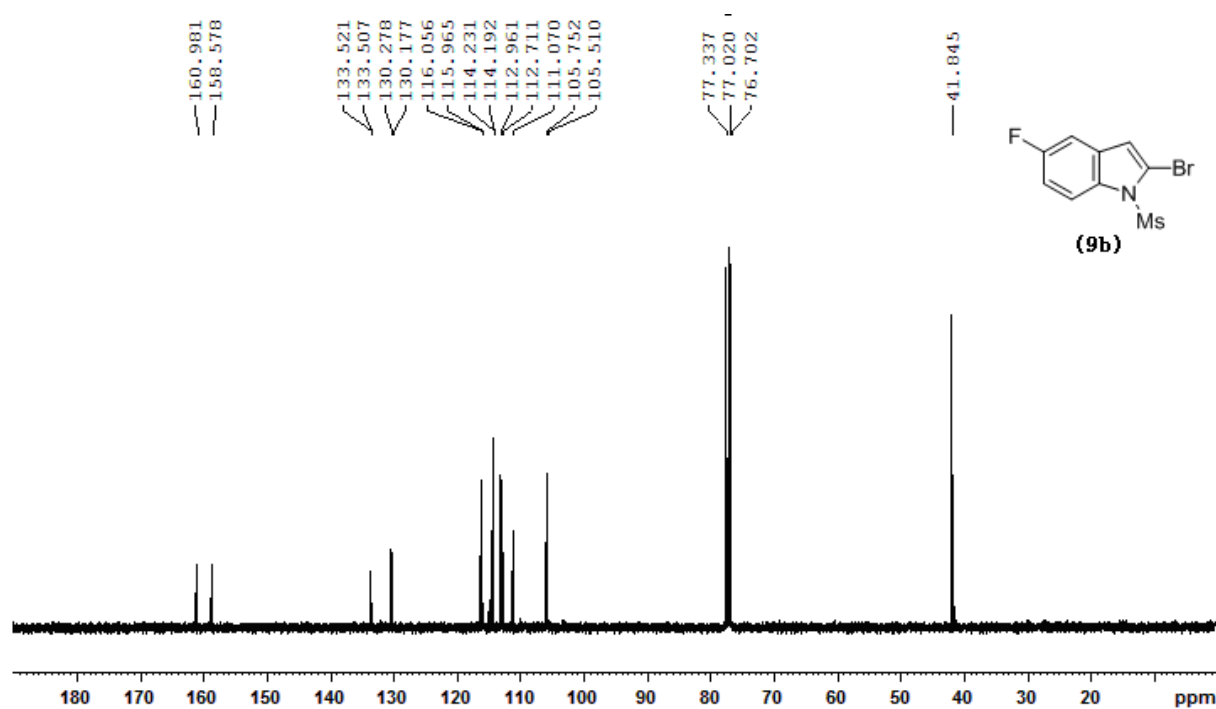

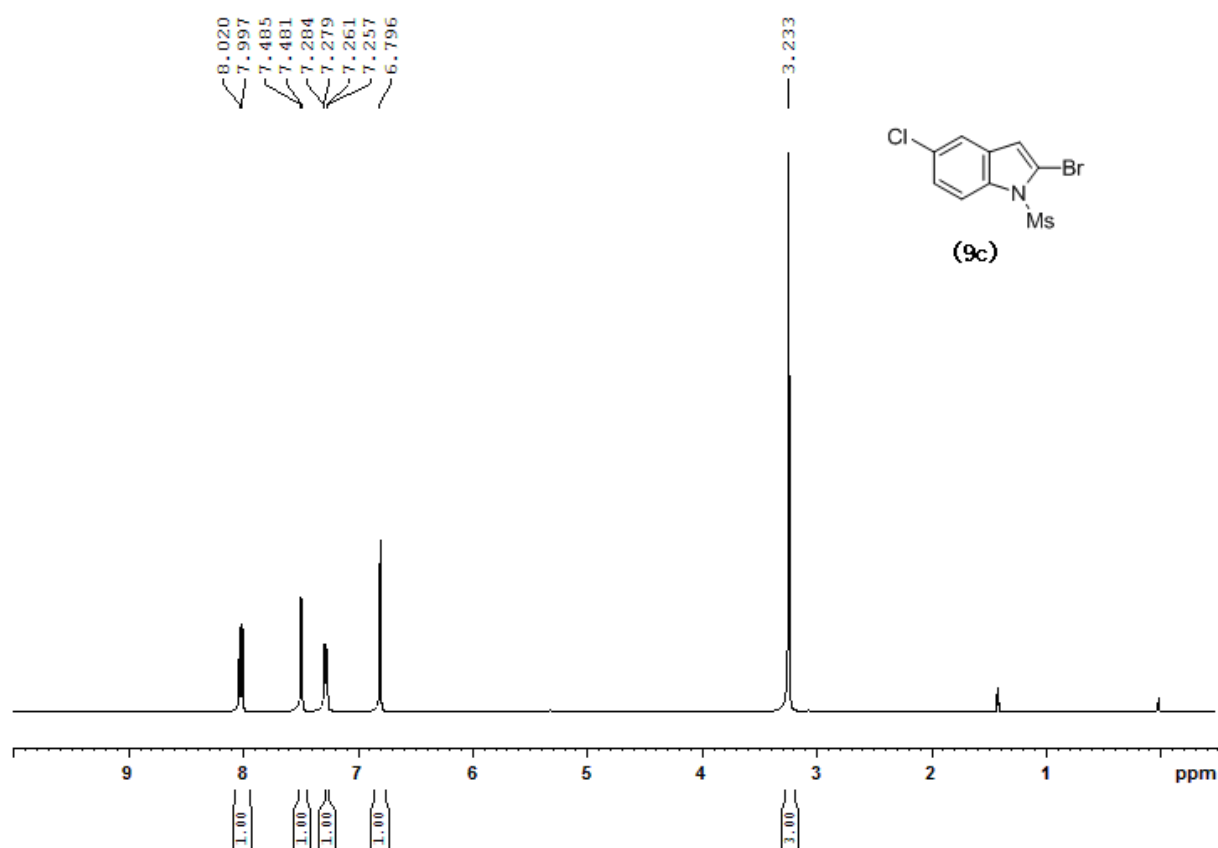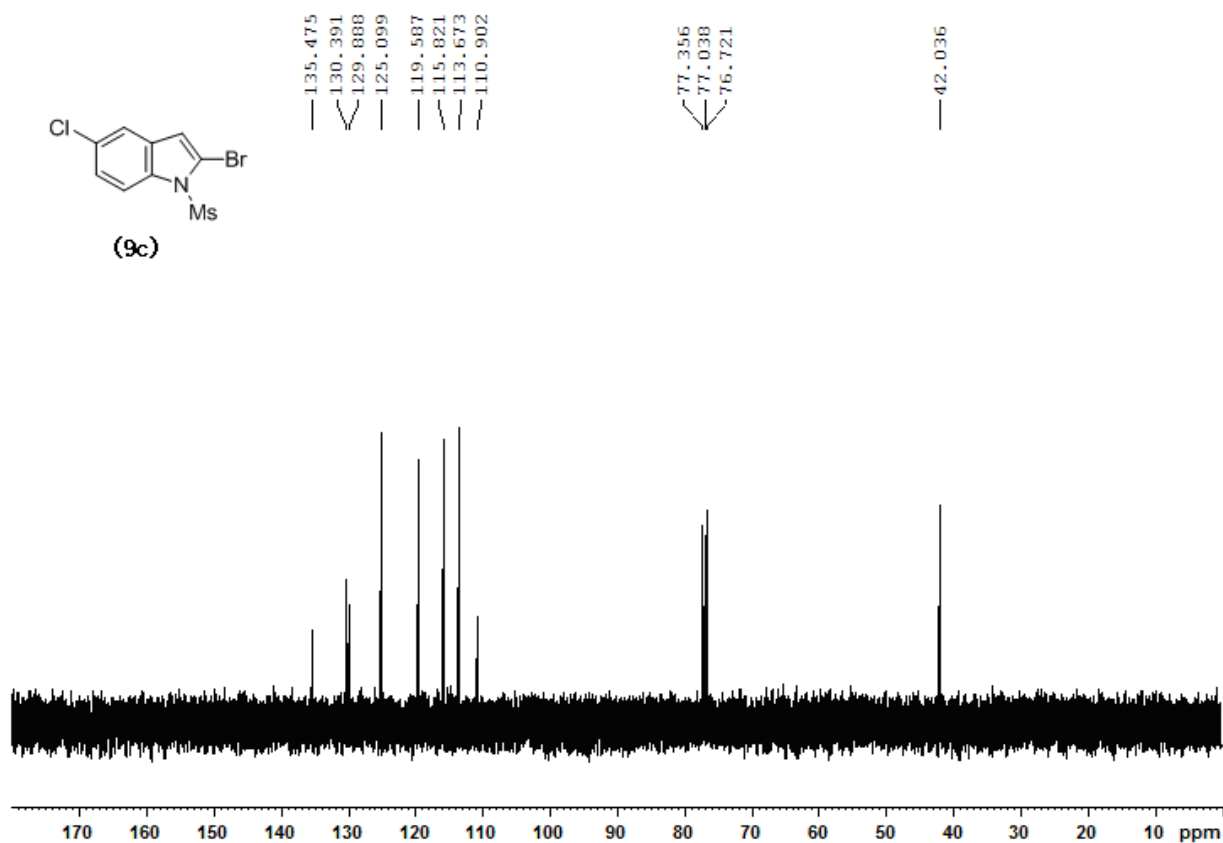

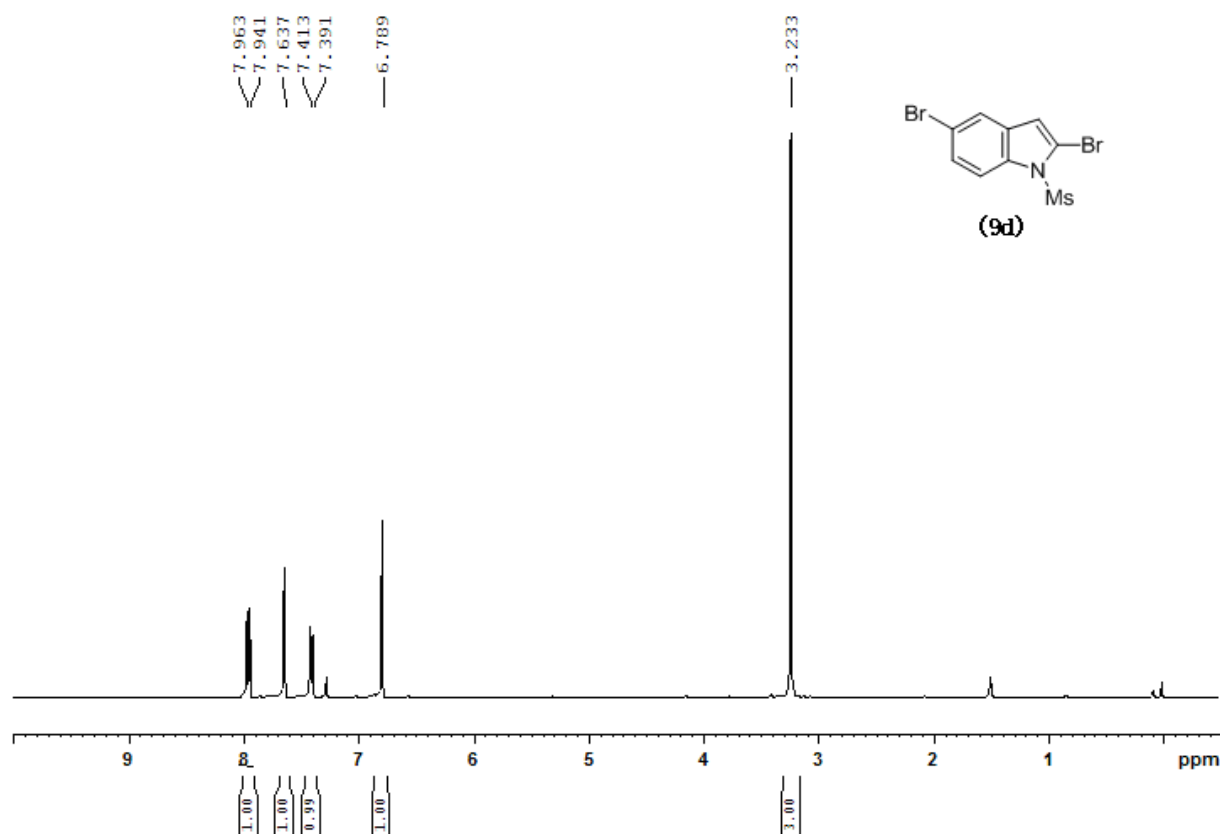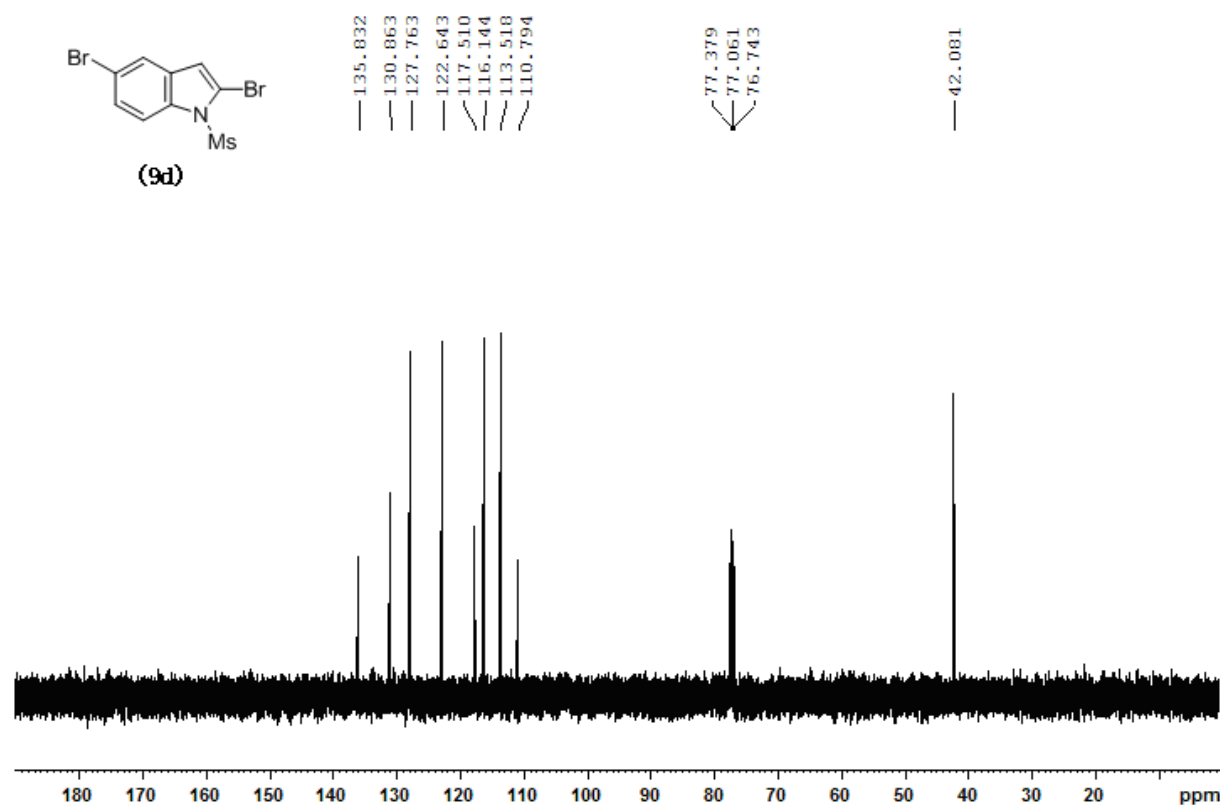

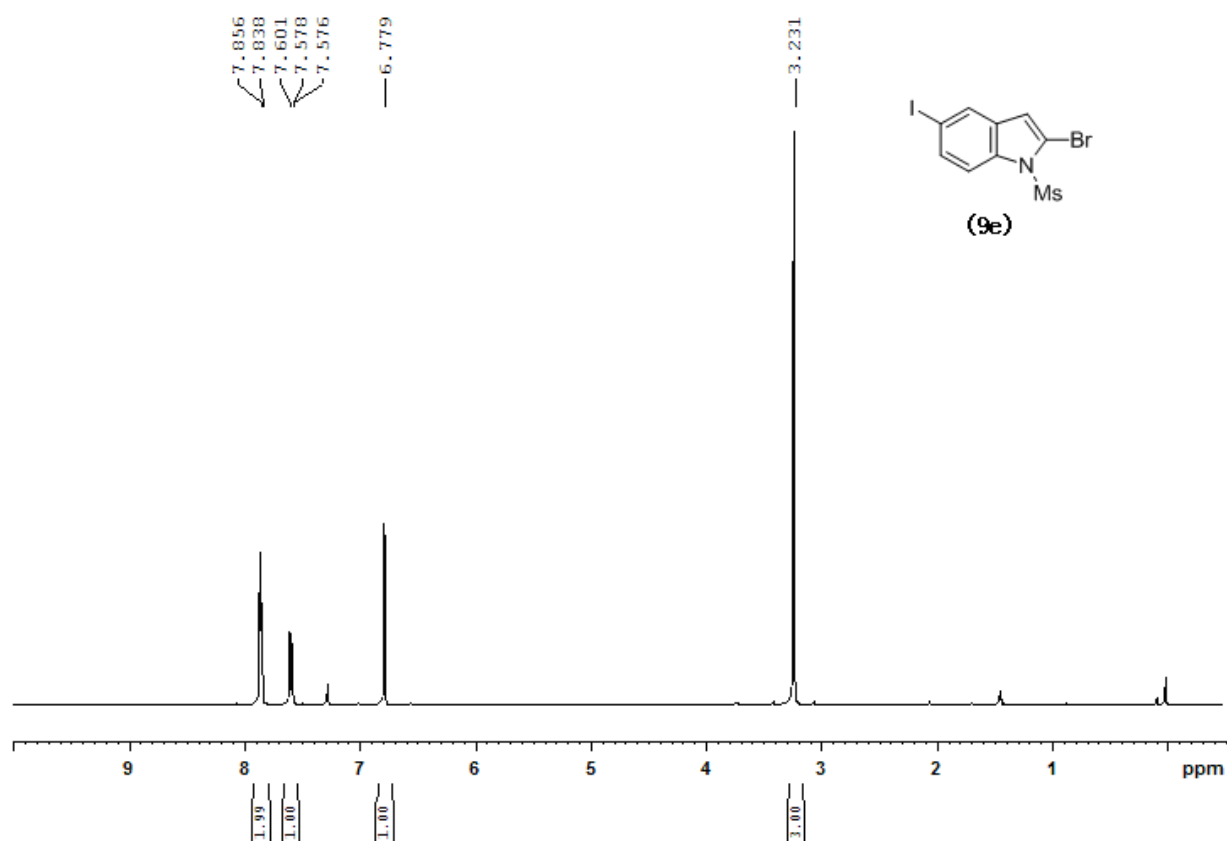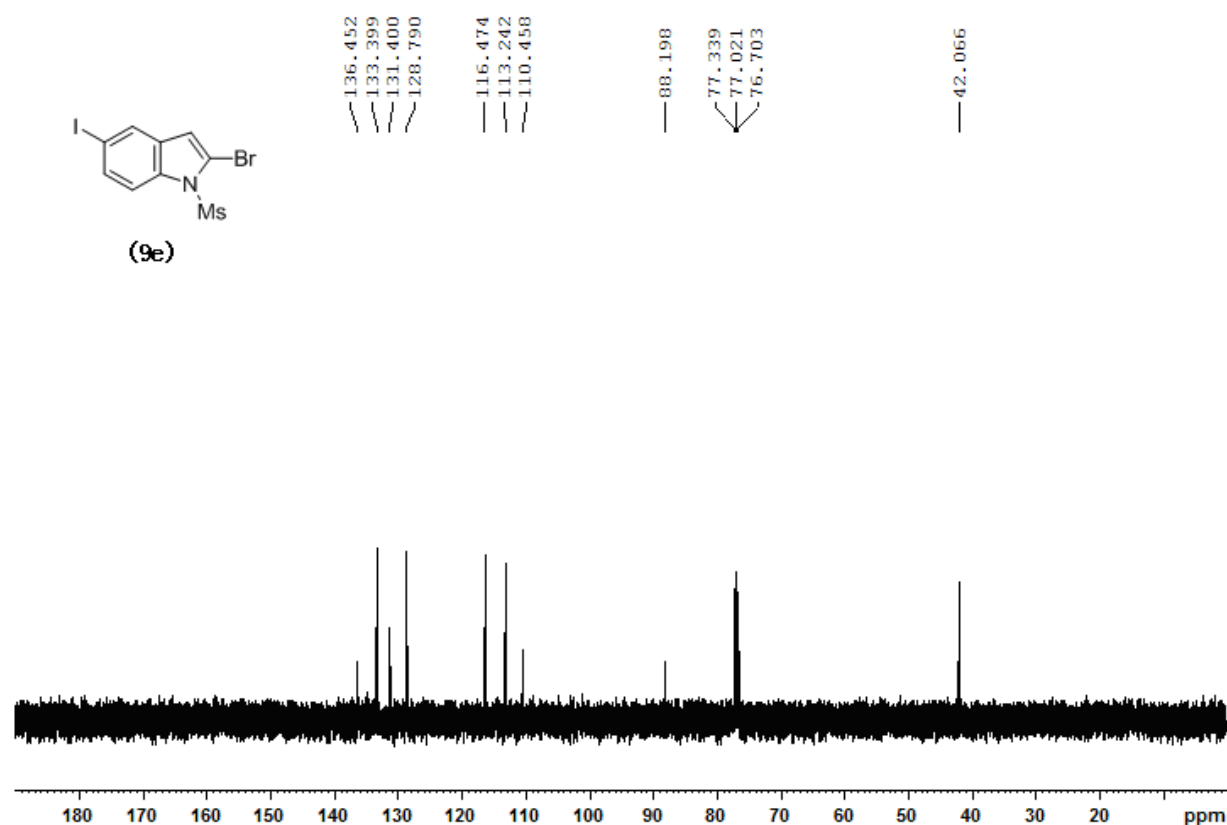

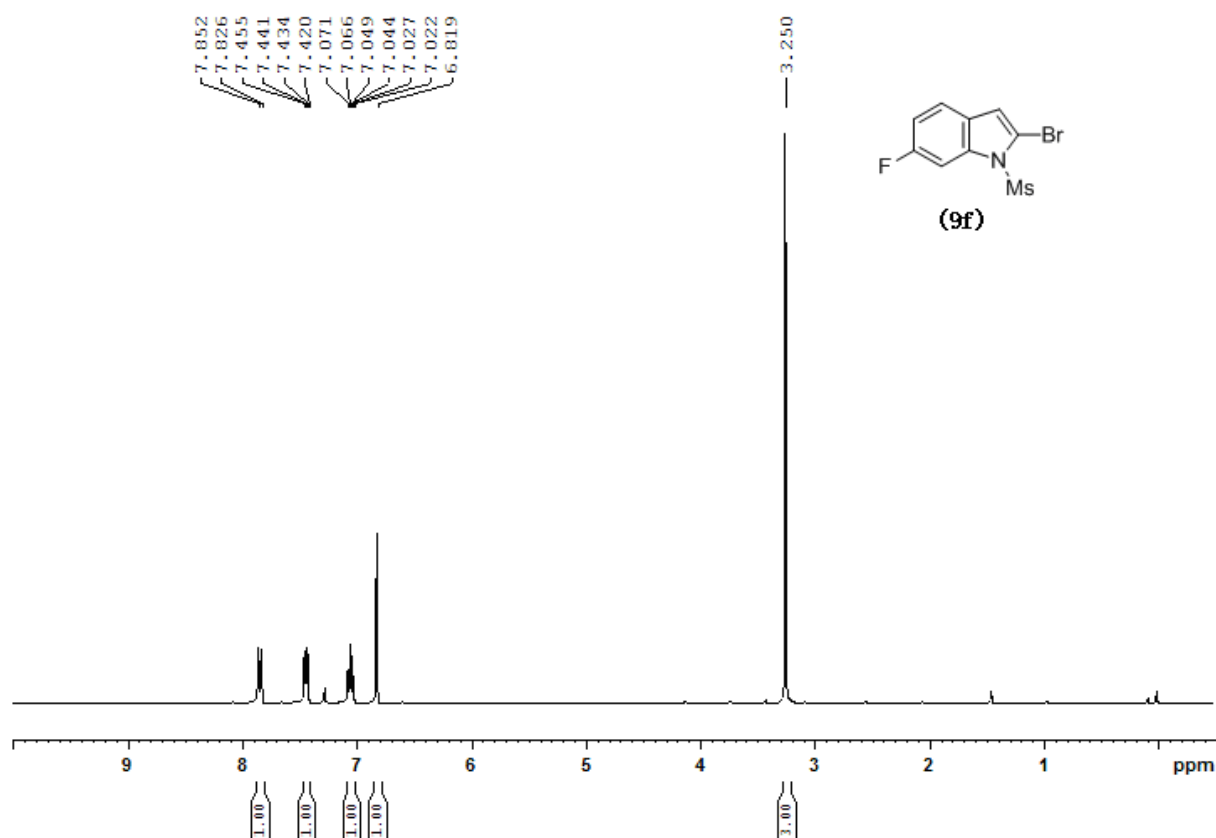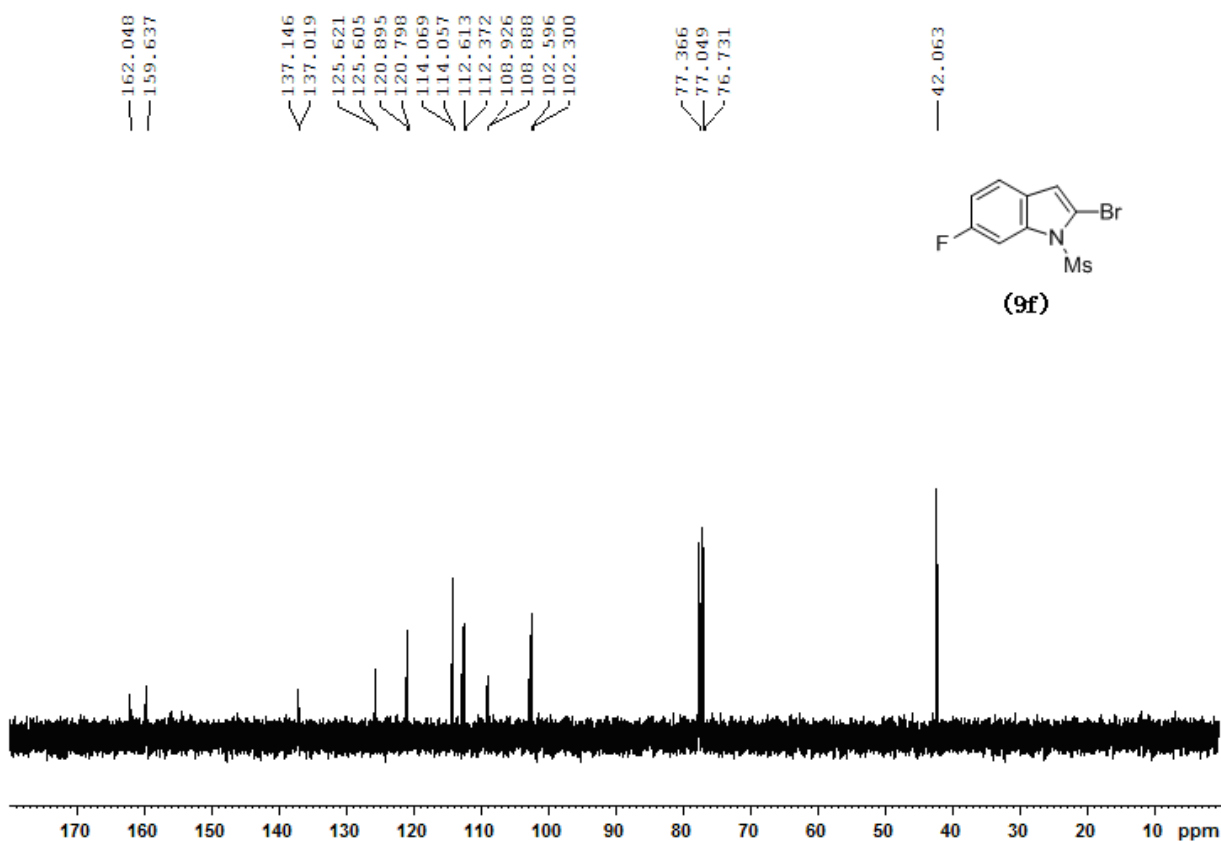

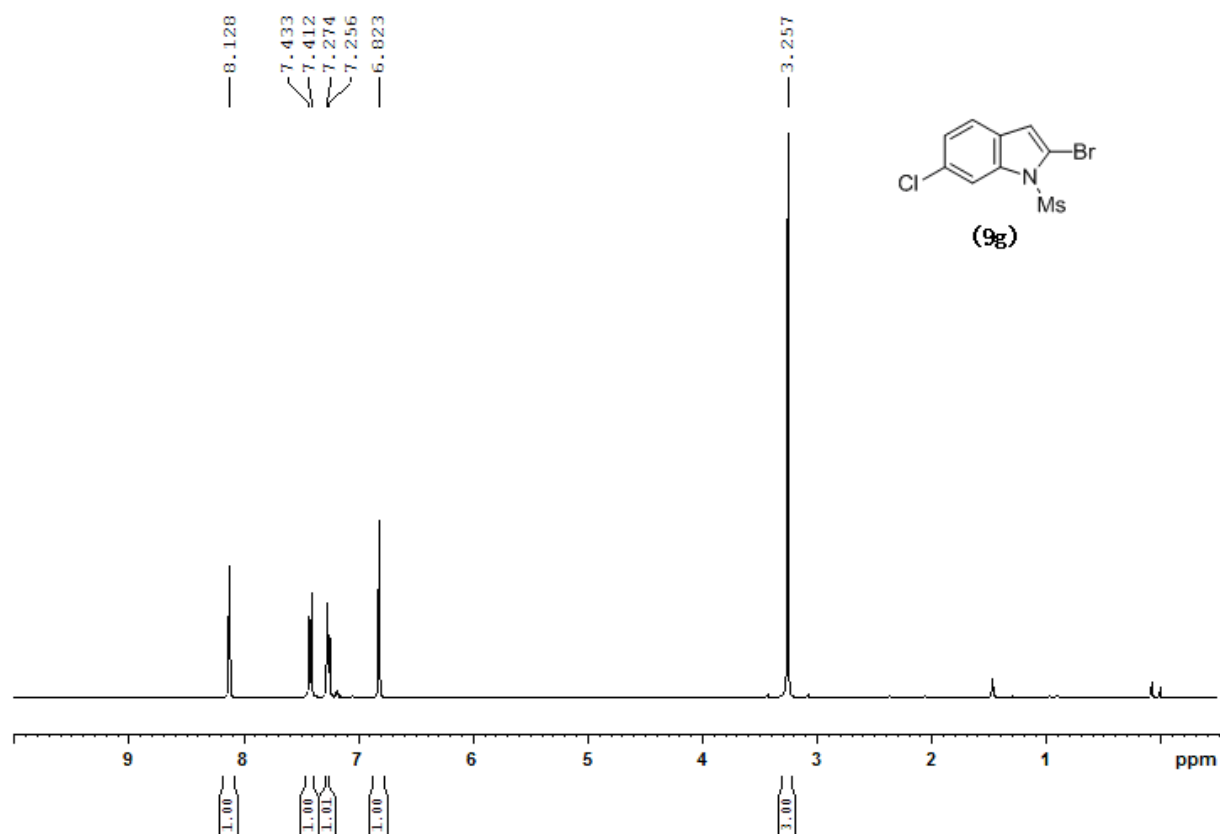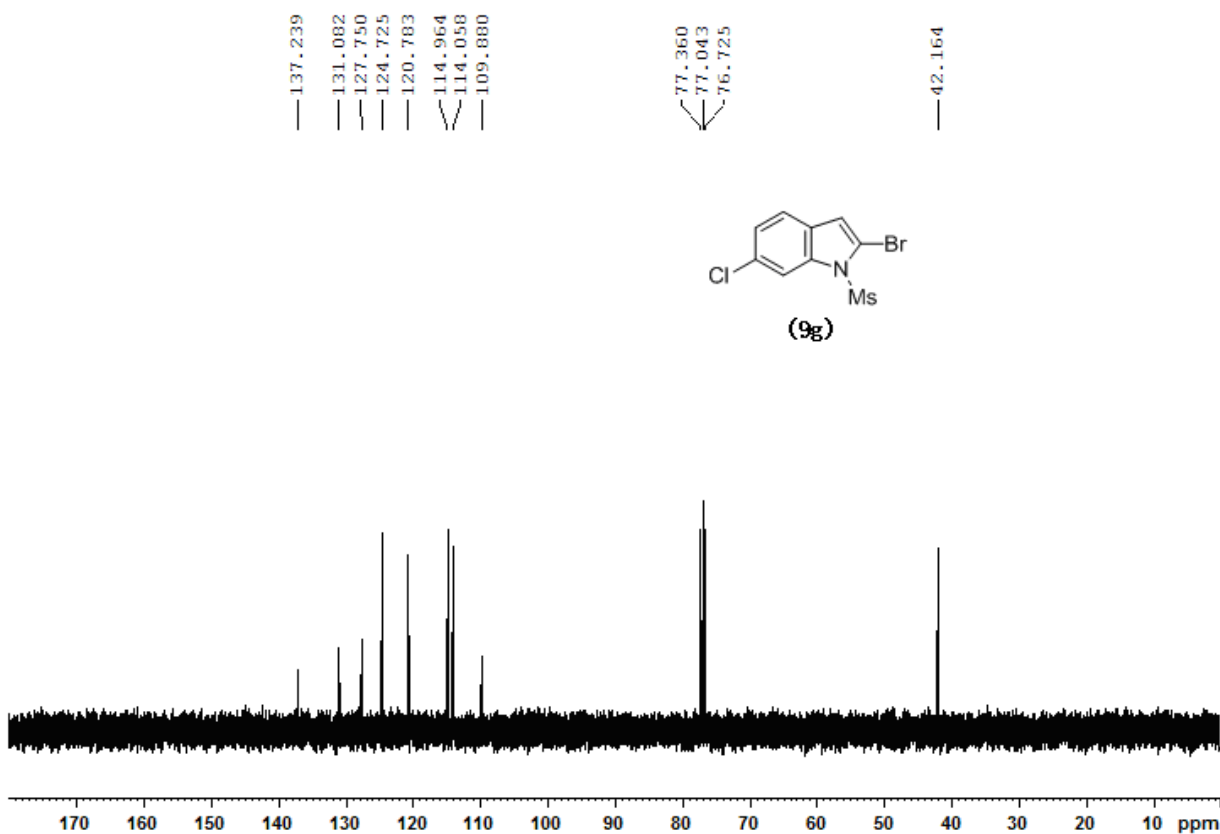

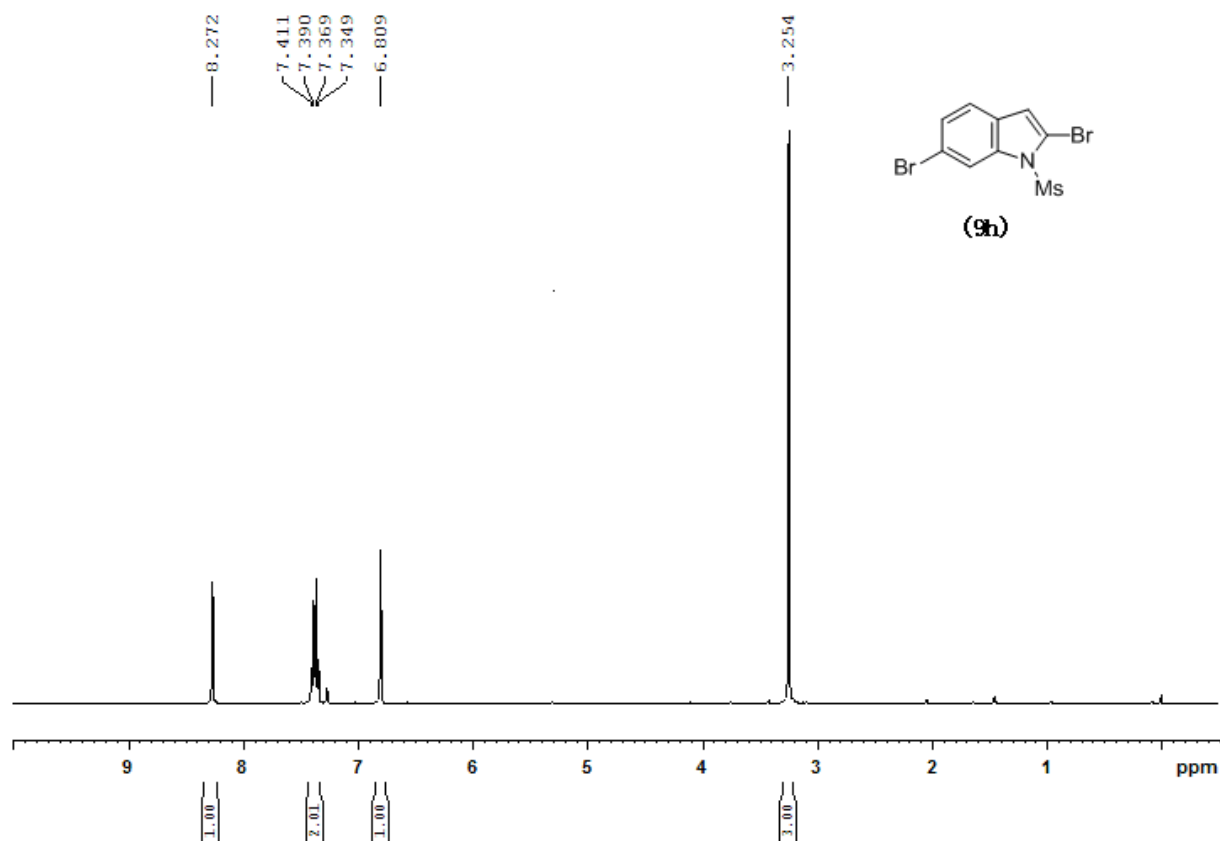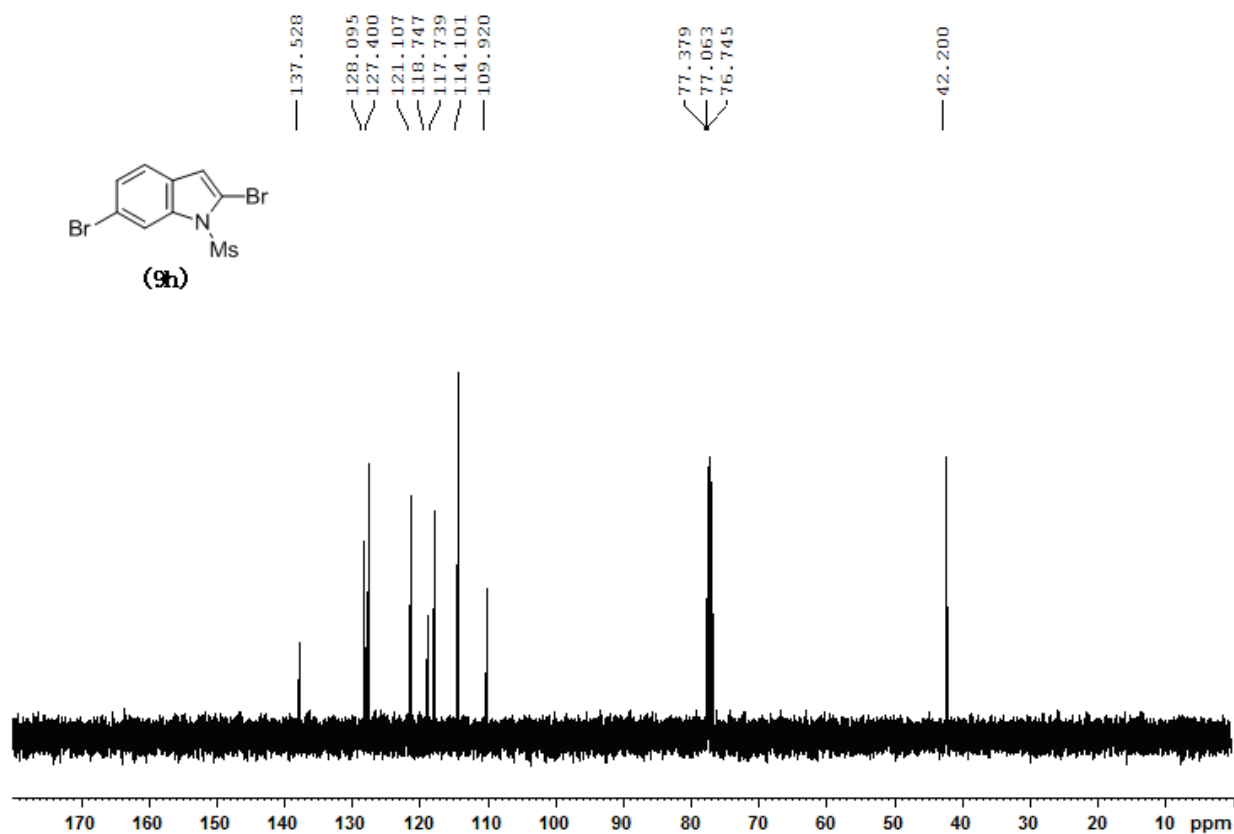



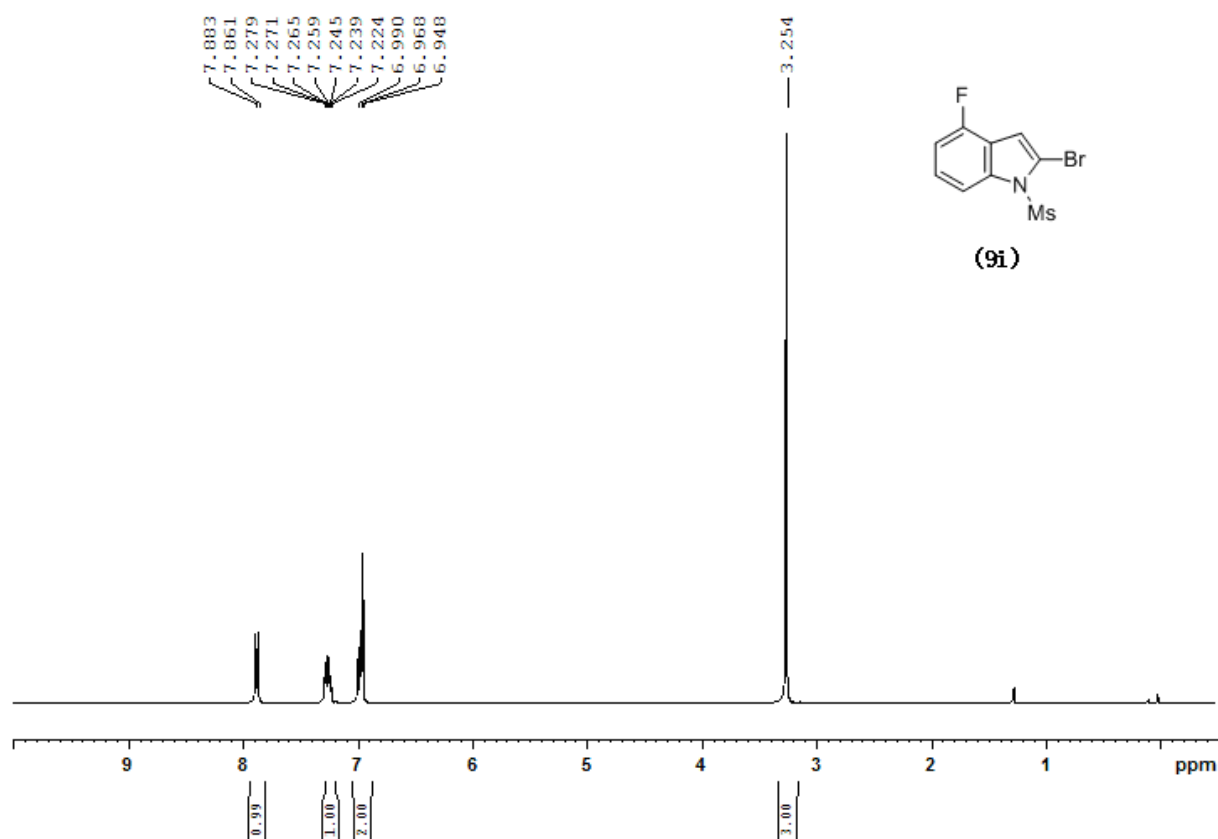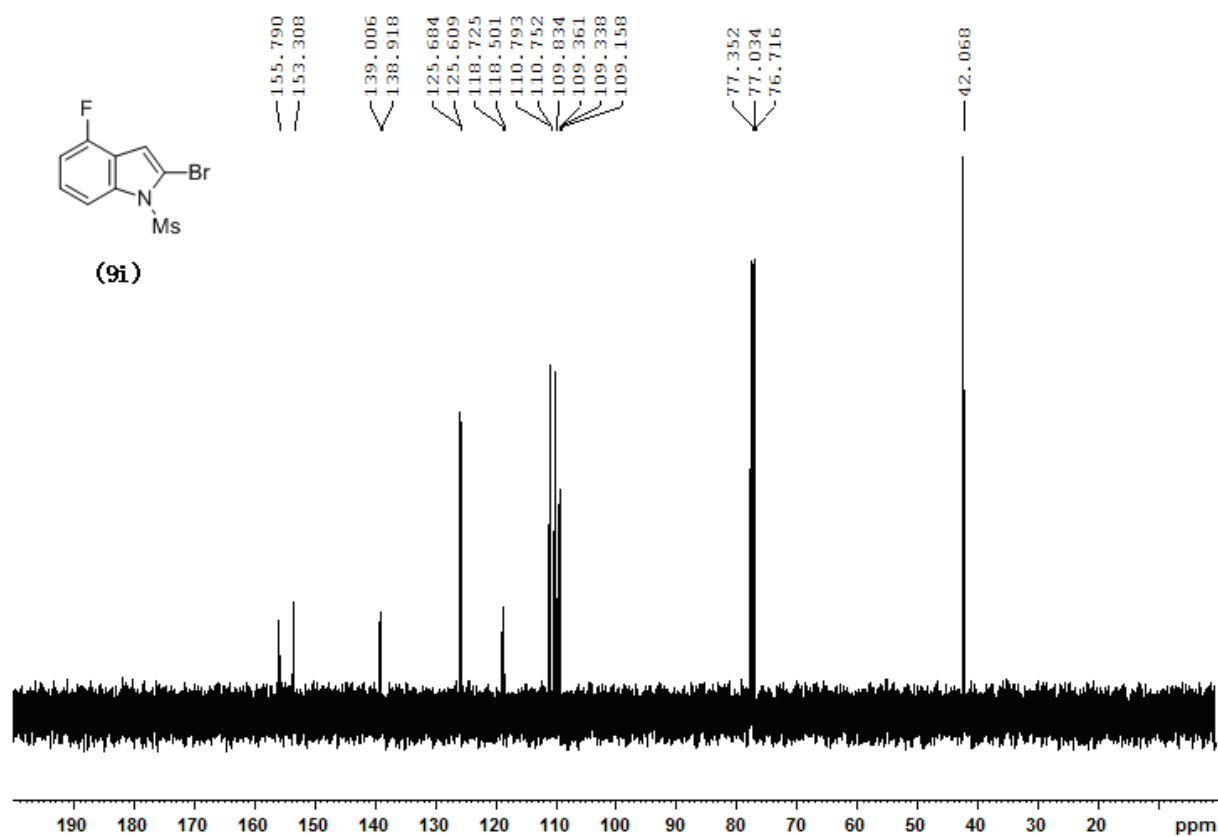

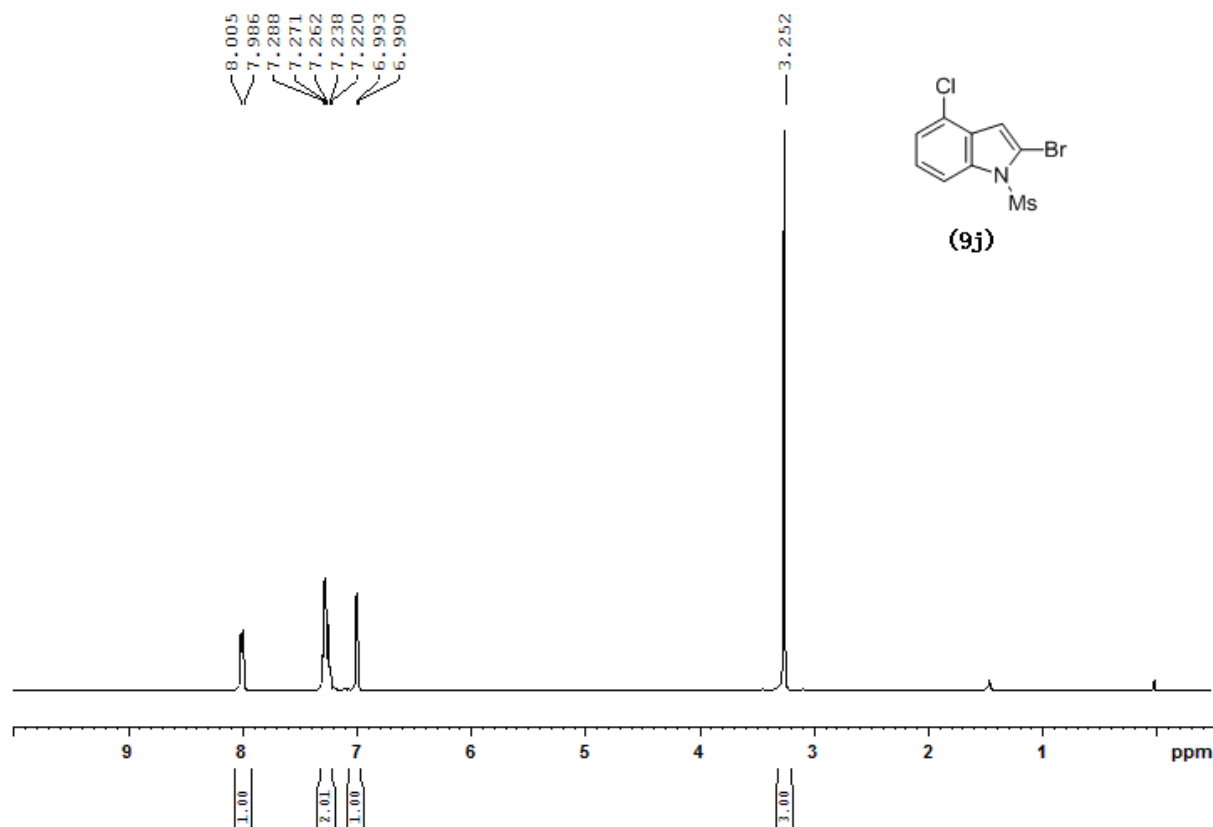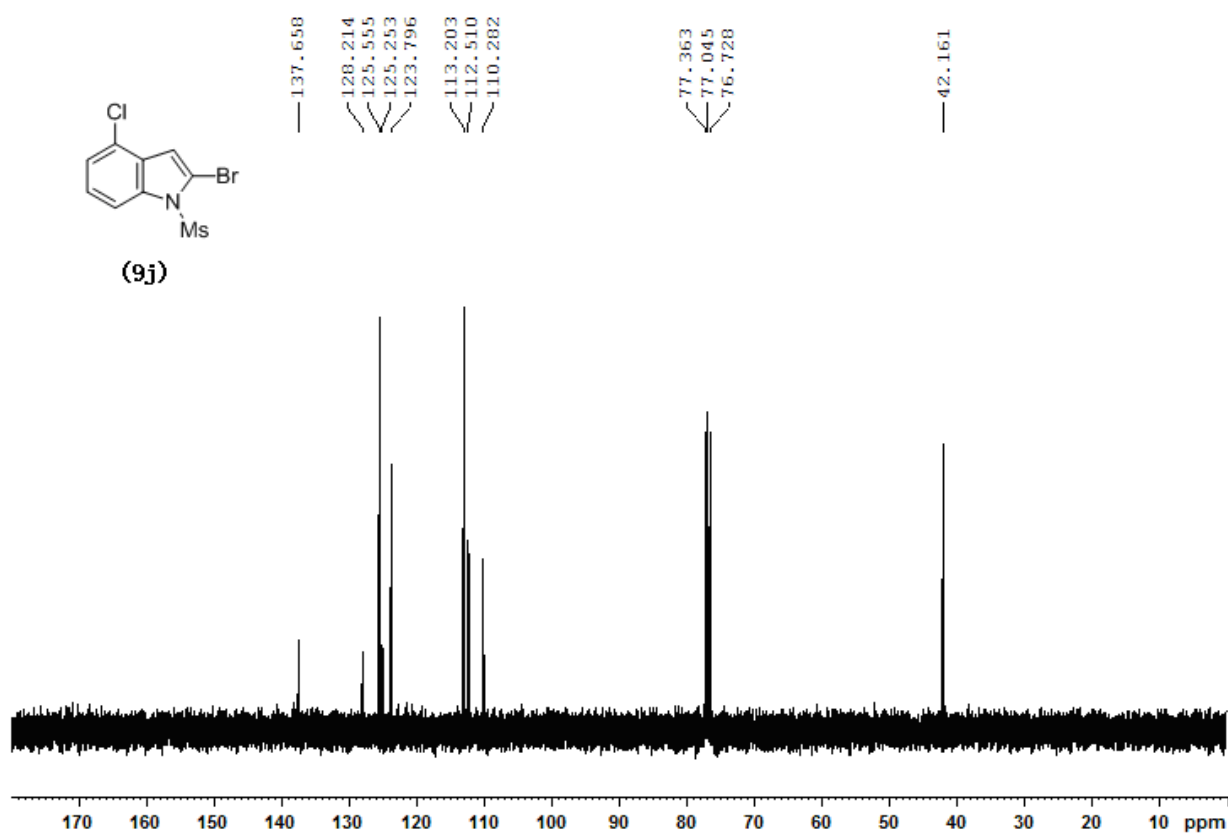

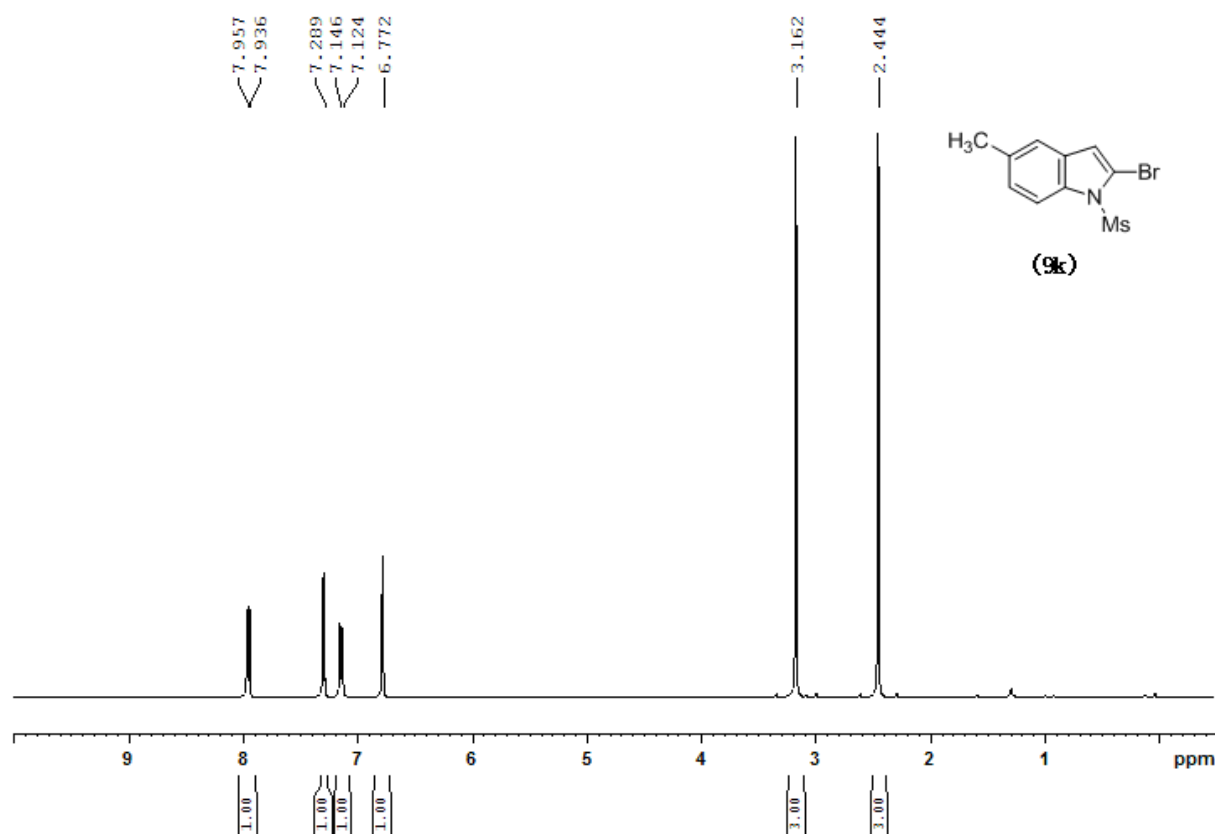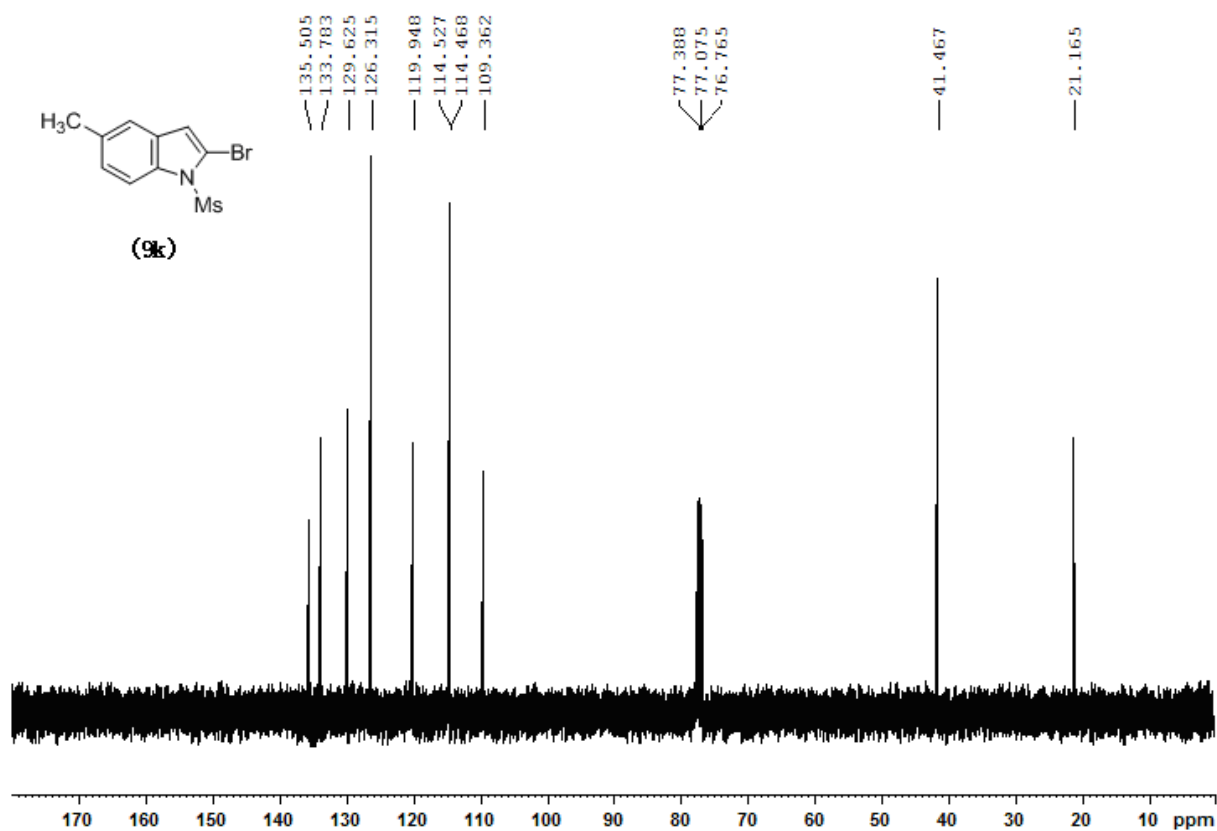

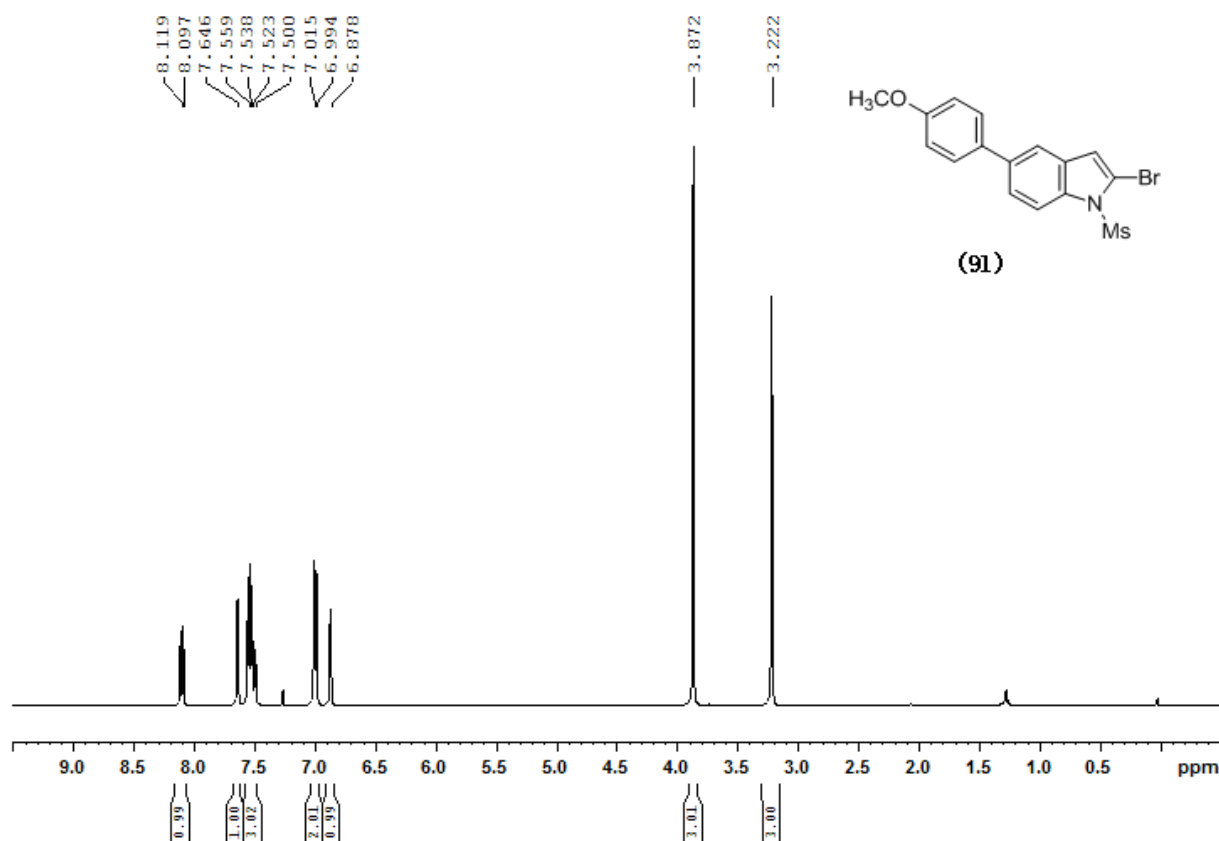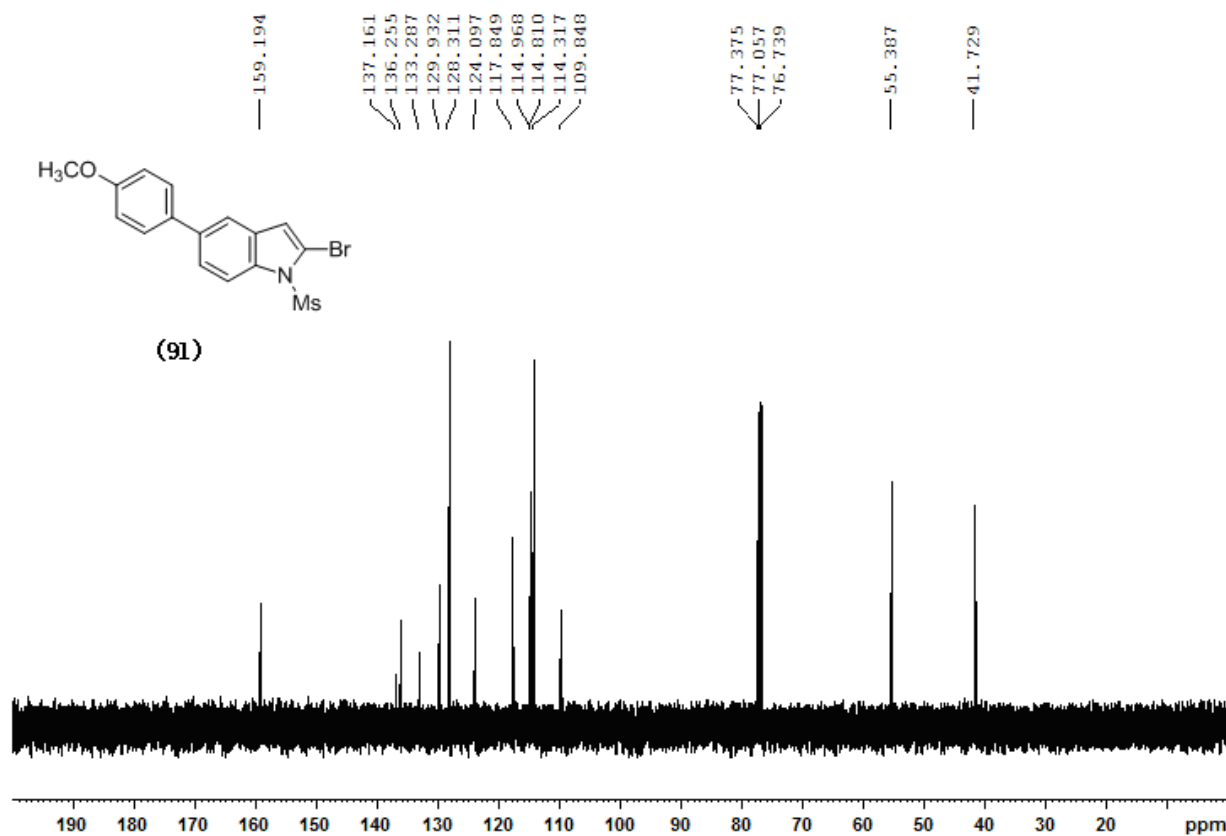

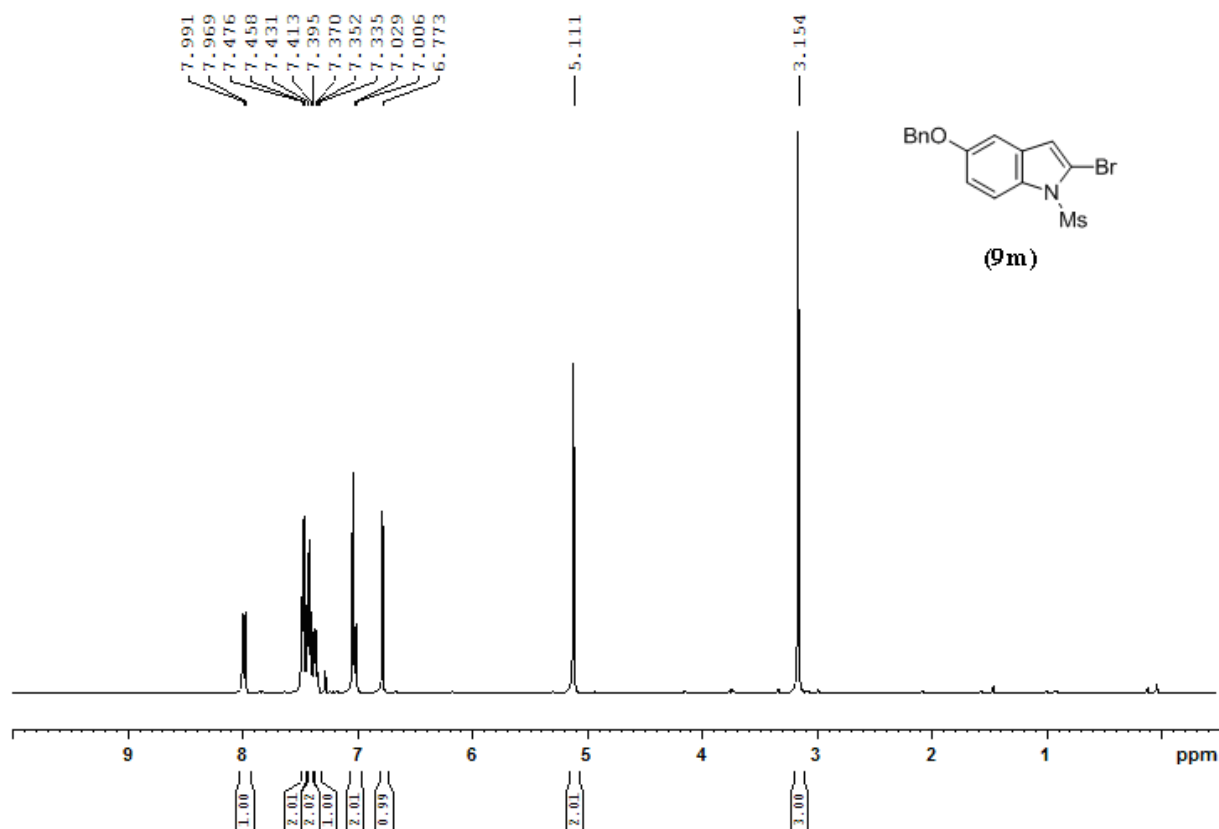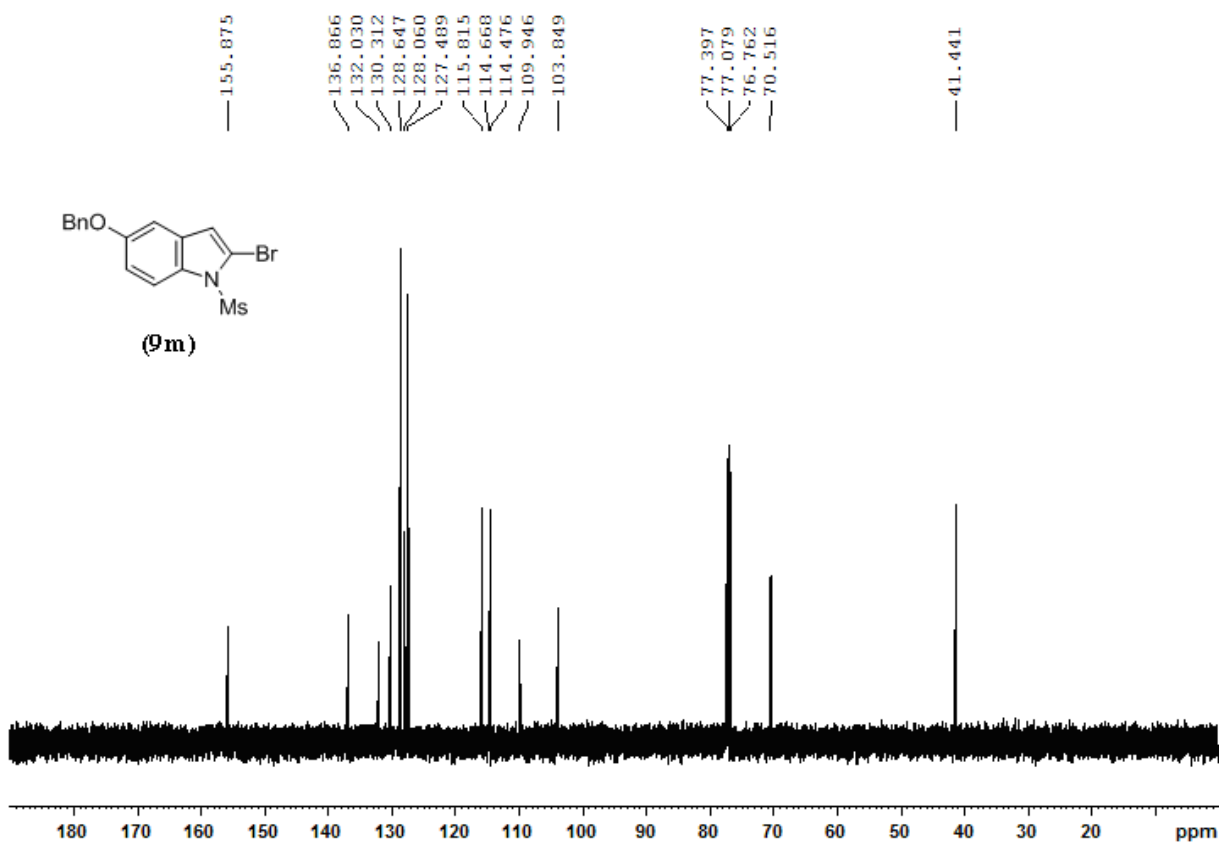

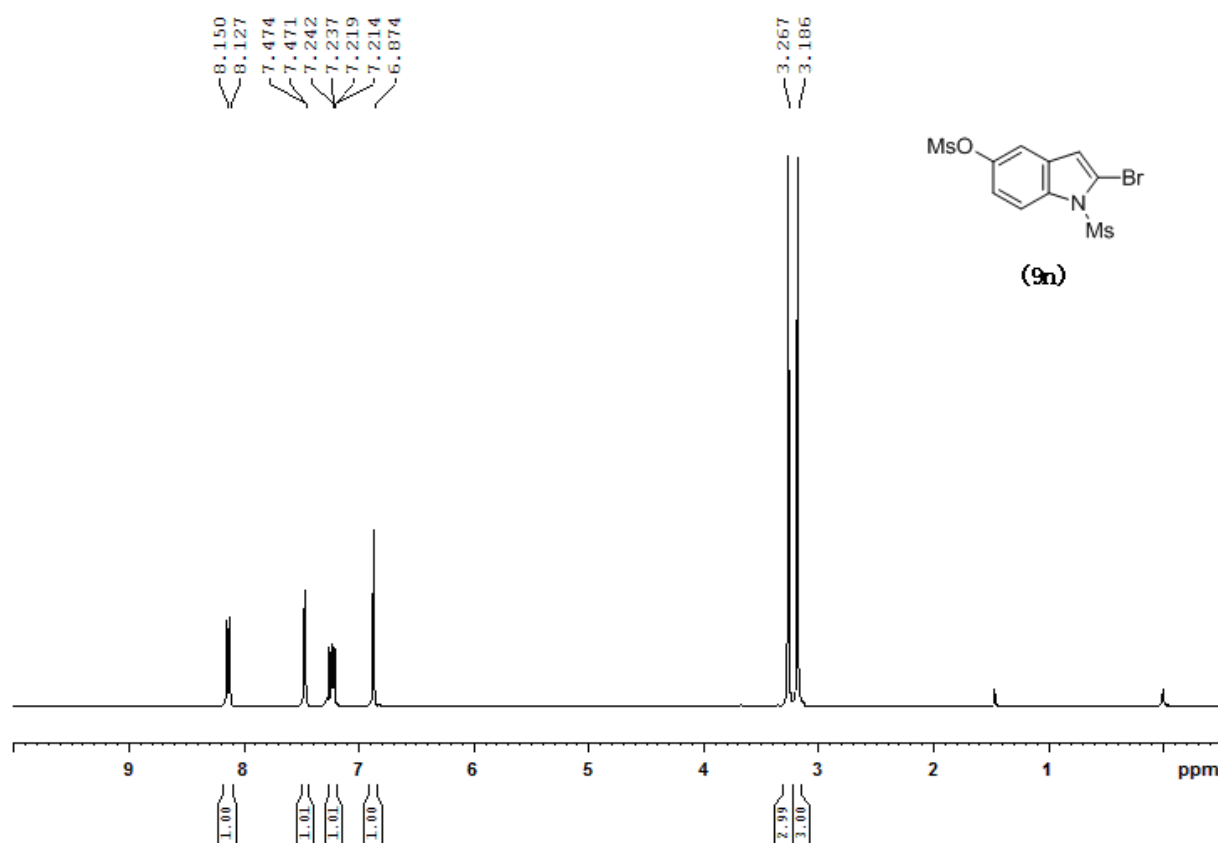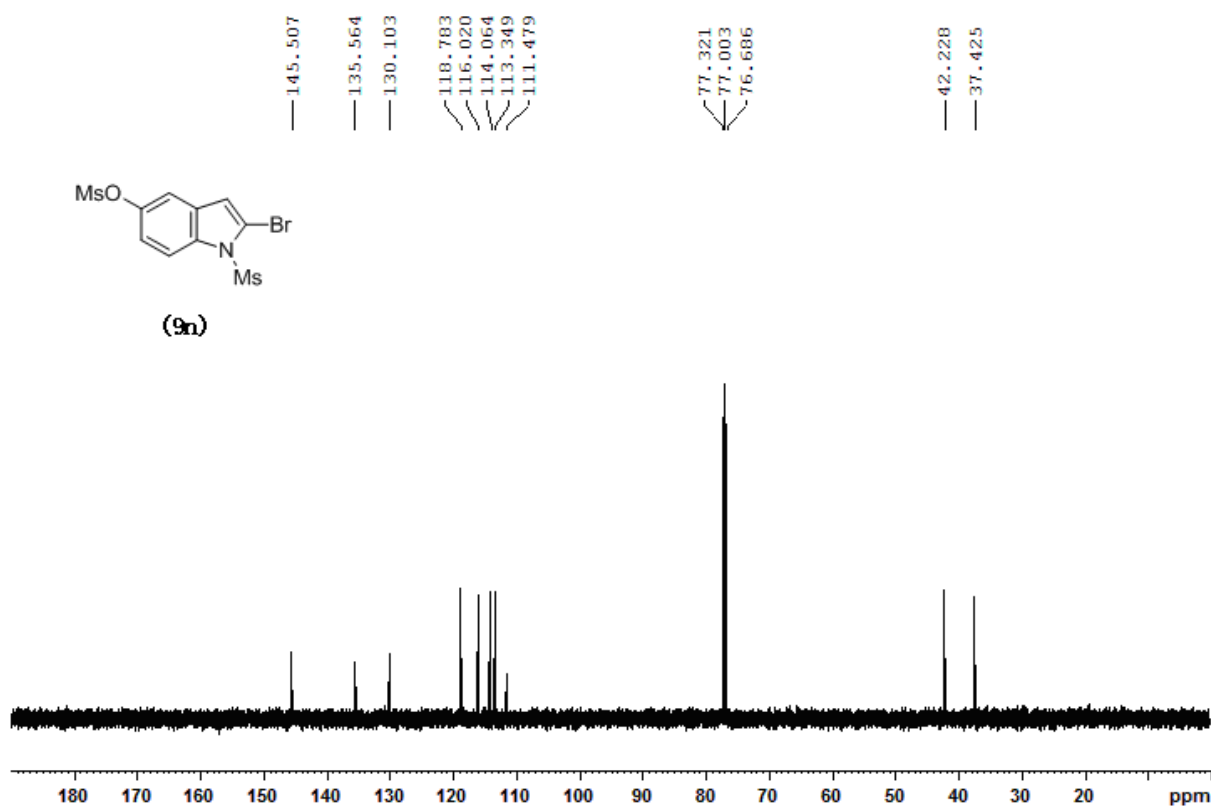

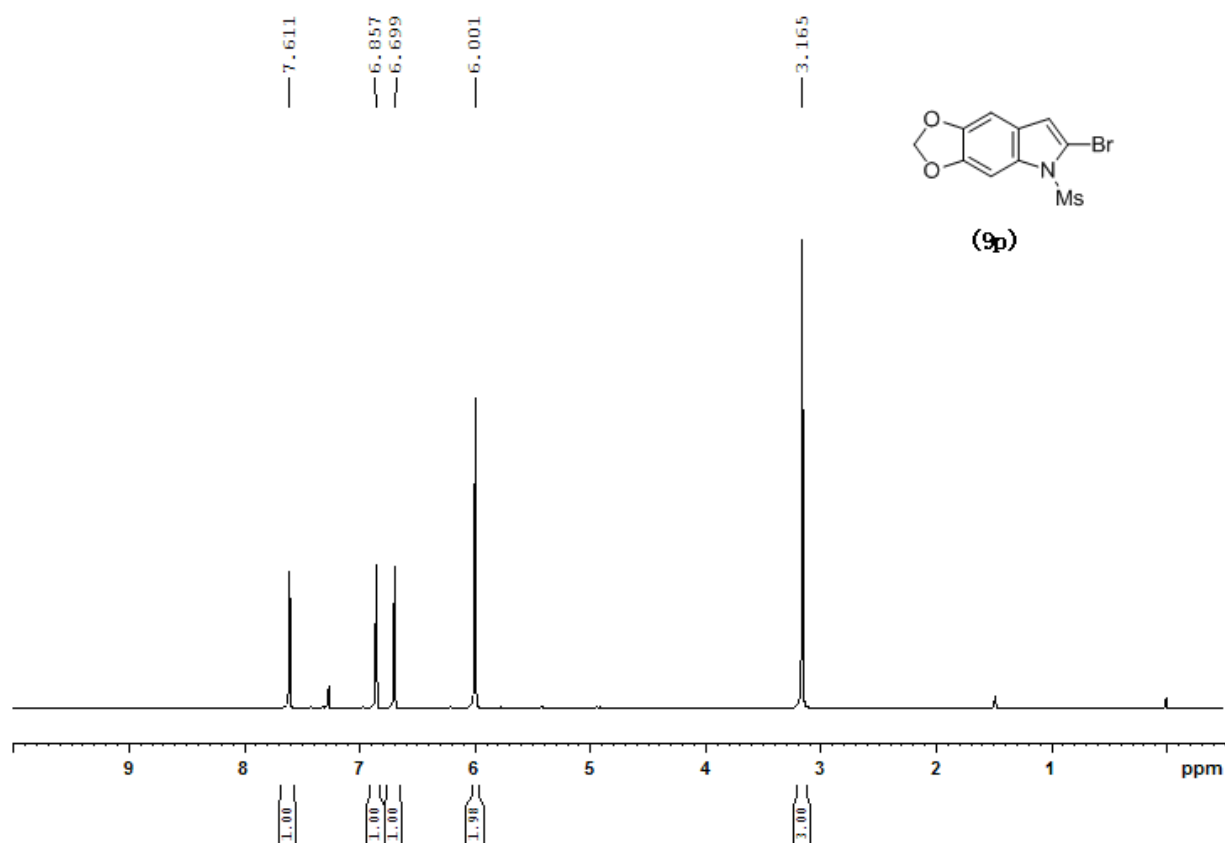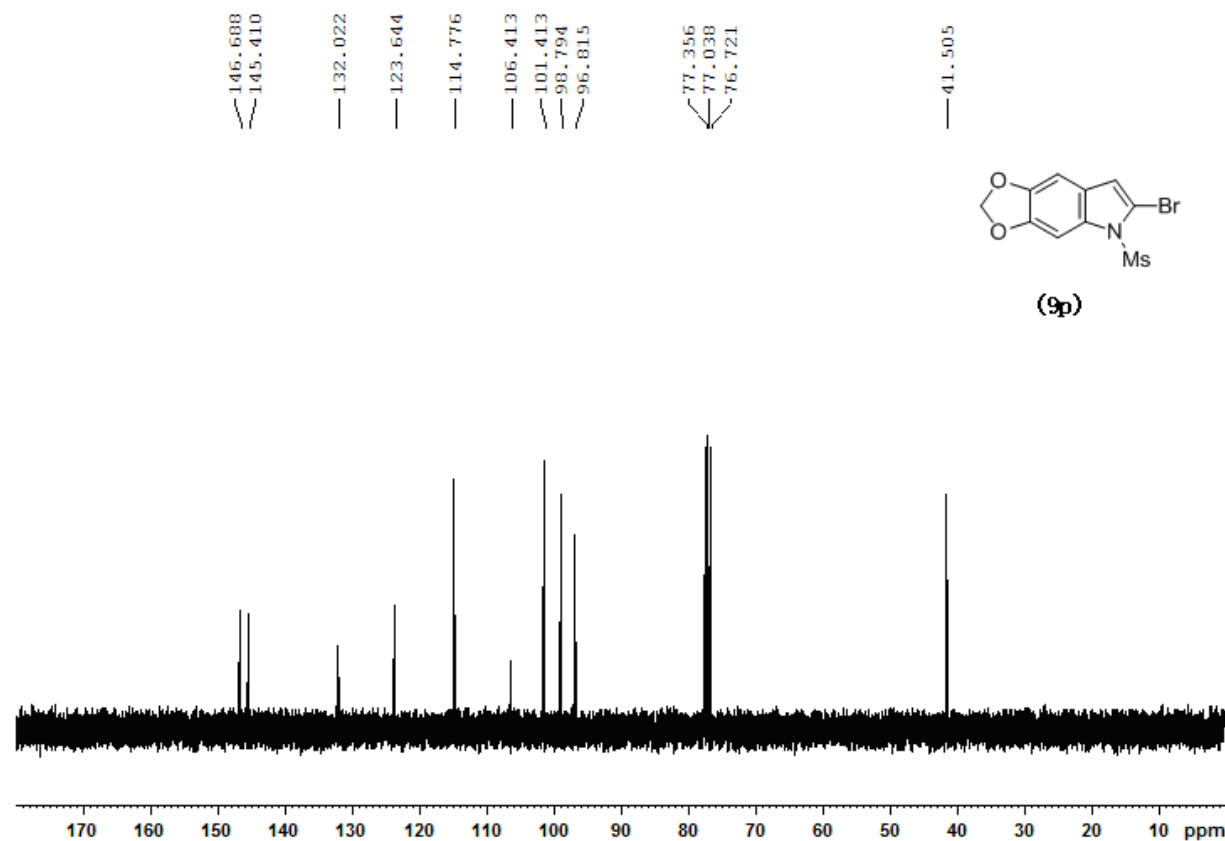

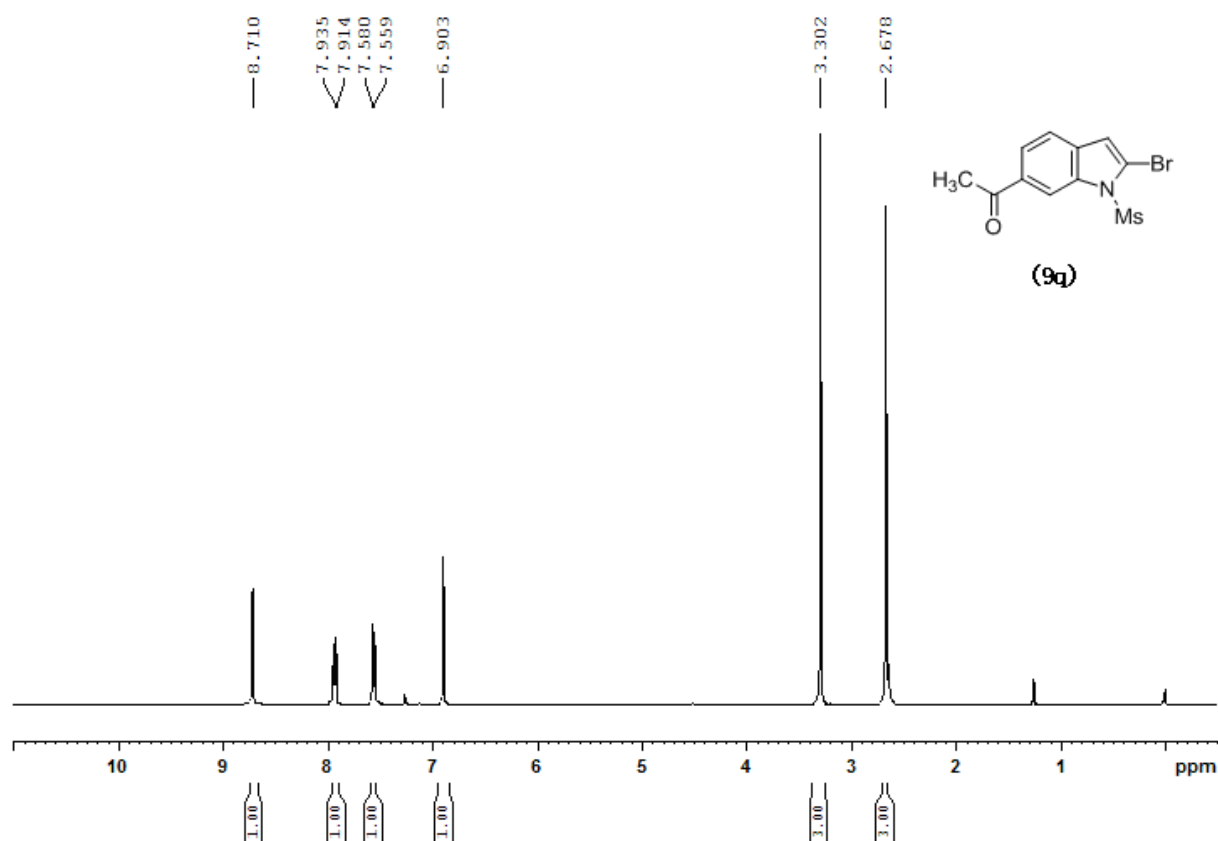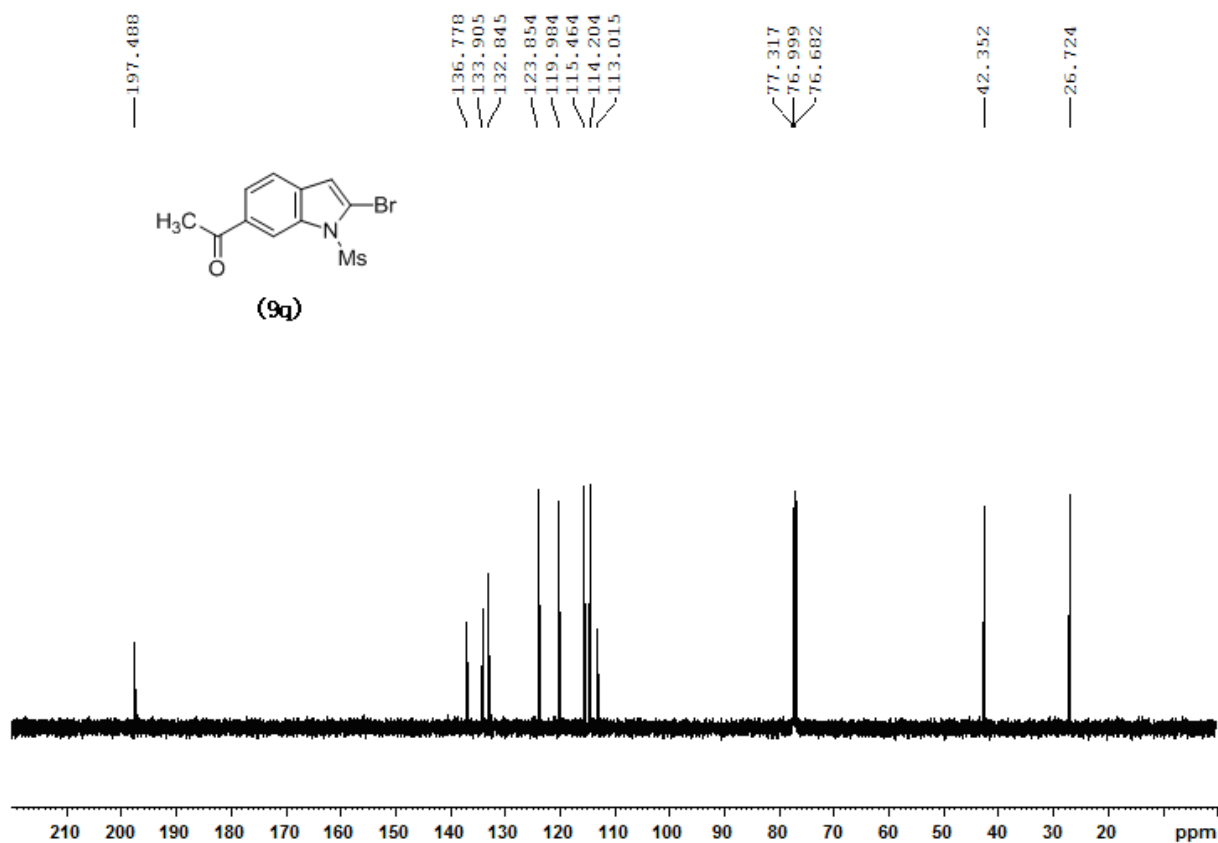



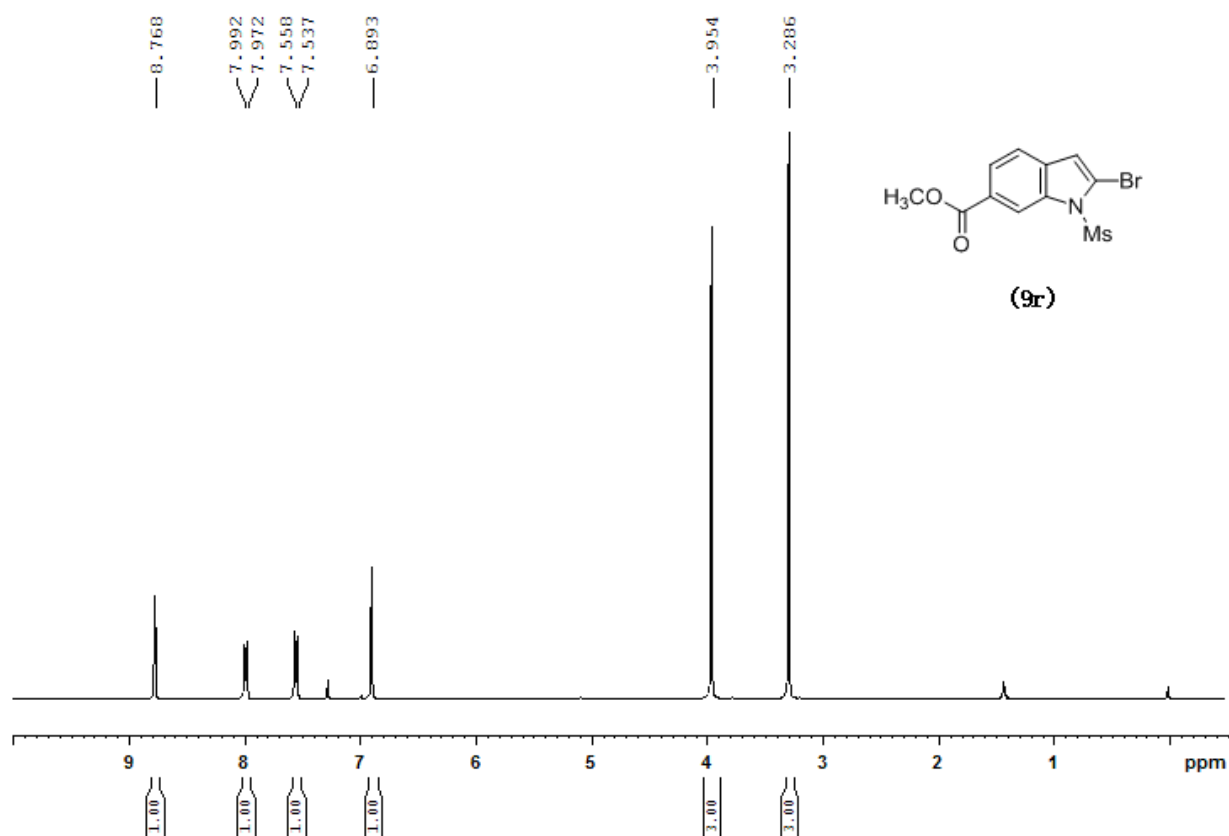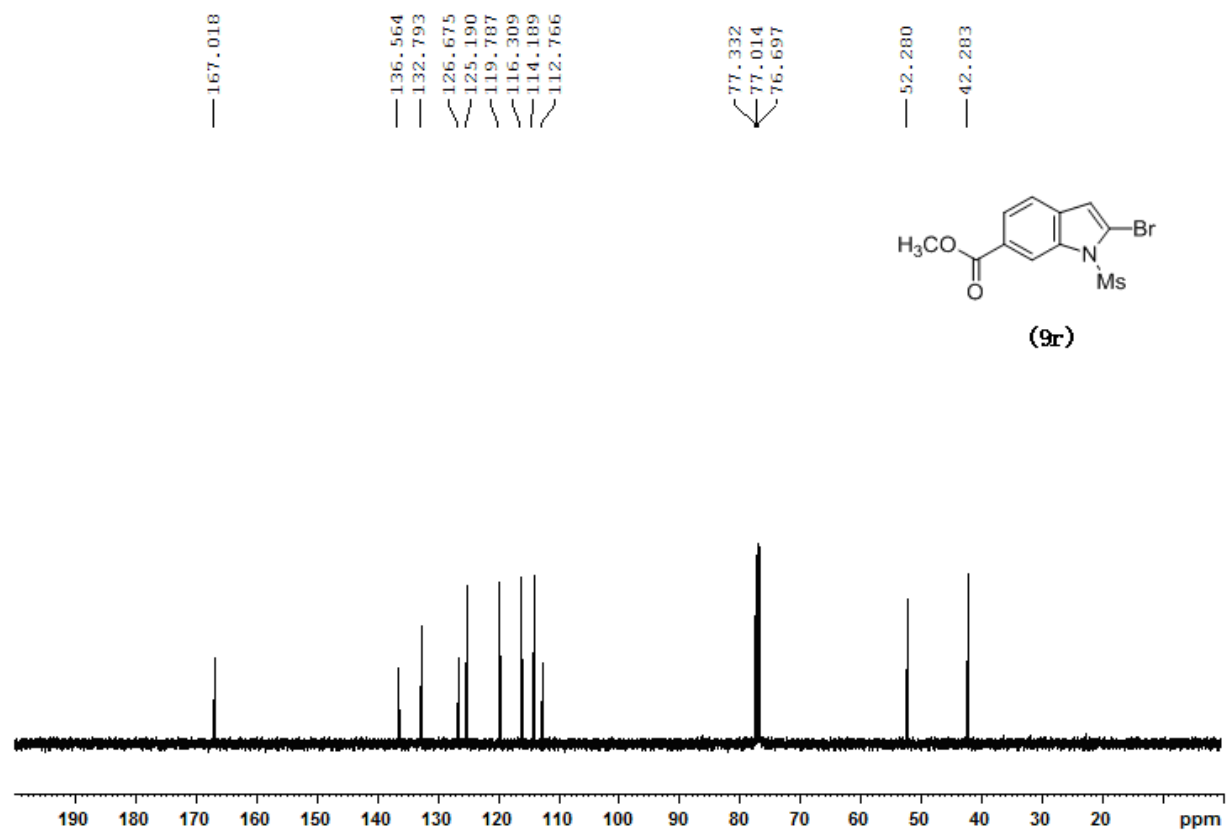

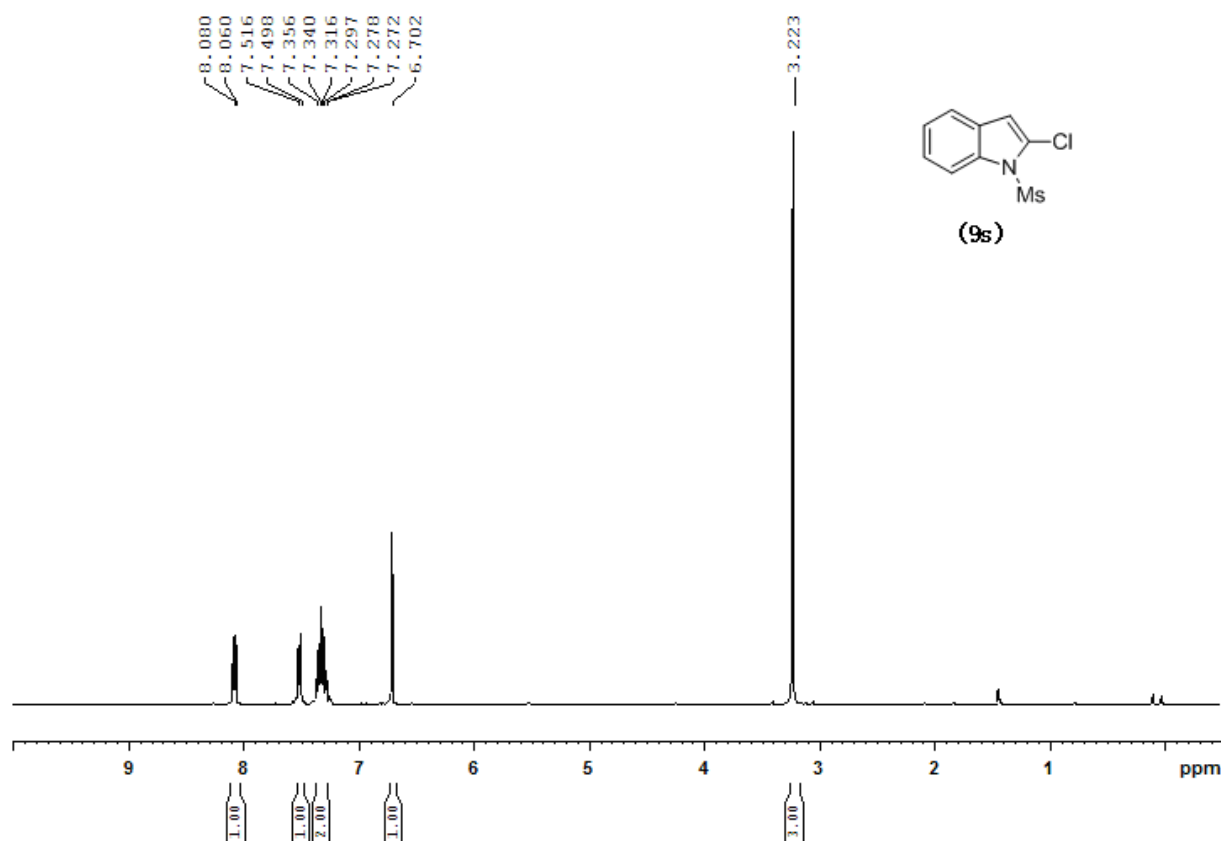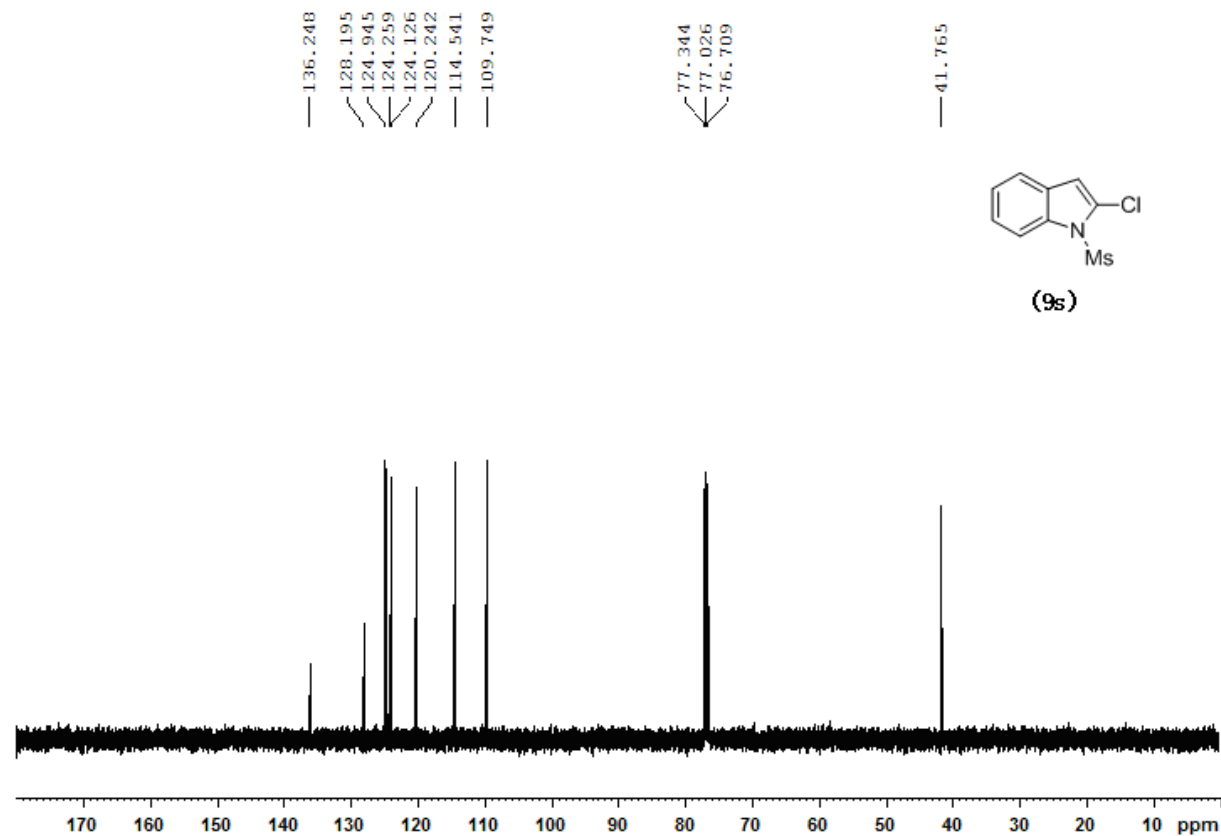

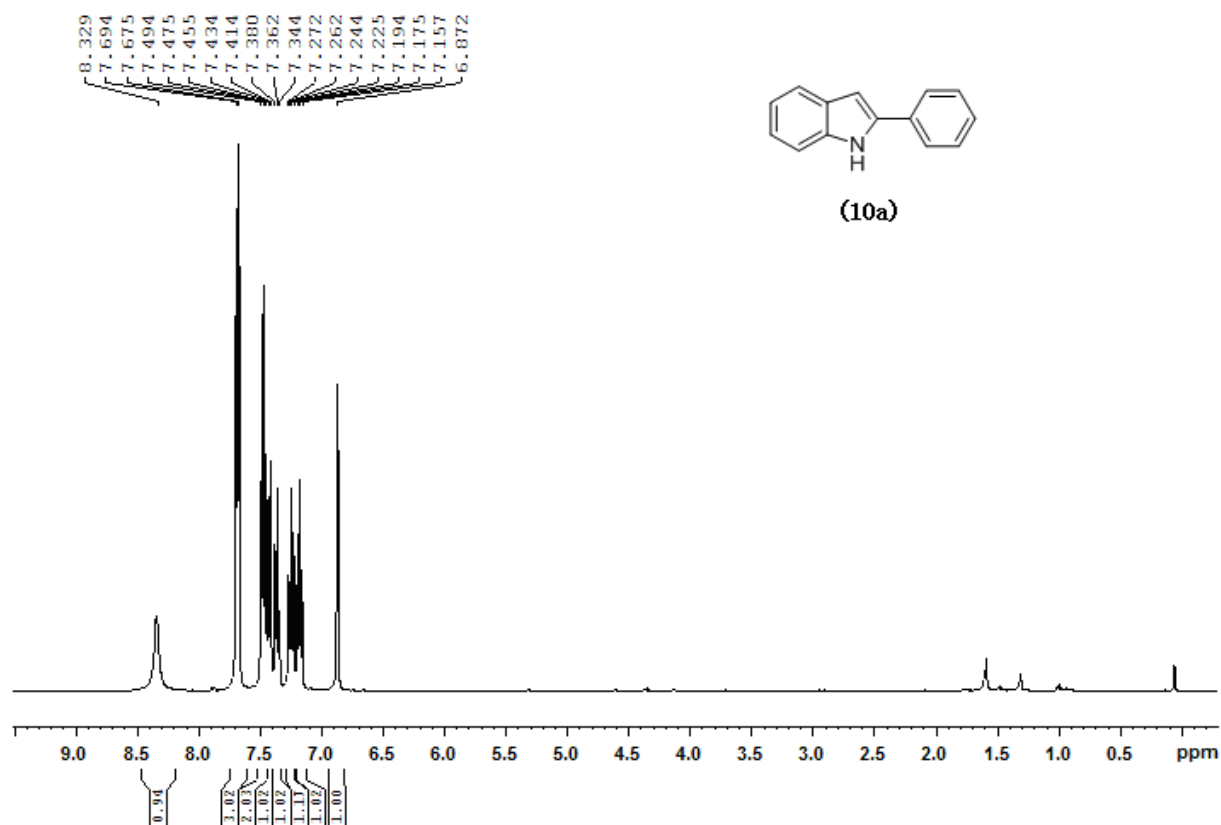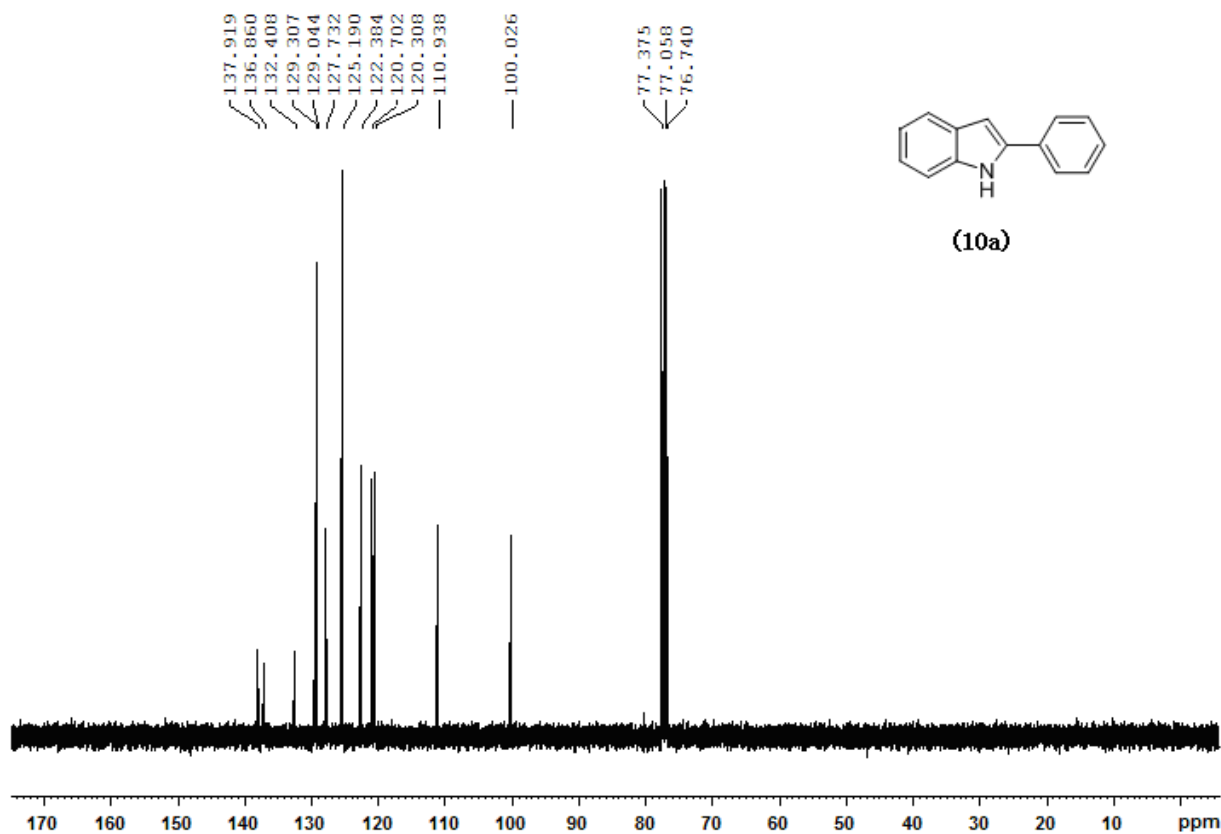

## 7. References

- [1] Fang, Y.-Q.; Lautens, M. *J. Org. Chem.* **2008**, *73*, 538.
- [2] Newman, S. G.; Lautens, M. *J. Am. Chem. Soc.* **2010**, *132*, 11416.
- [3] Bergman, J.; Venemalm, L. *J. Org. Chem.* **1992**, *57*, 2495.
- [4] Jiang, B.; Tao, K.; Shen, W.; Zhang, J. *Tetrahedron Lett.* **2010**, *51*, 6342.
